# Supplementary material
Source: publisher figshare collection journal article supplement (https://acs.figshare.com/ndownloader/files/10498600)
Supplement: Supplementary file 1 [file 10498600]

## Sheet: S2
L1 medium ES- peaks, low in daf-22					Peaks that are present but not diff. in growth medium			Peaks that are also diff. in growth medium			Peaks that are also in growth medium table		manually added entries		has corresponding peak in ES+ table
class	smid-db	rt (min)	m/z (ES-)	MS/MS (ES-)	m/z (ES+)	MS/MS (ES+)	comments
ascr		1.57042	332.172	73.02831 (C3H5O2-), 86.02363 (C3H4NO2-), 315.14468 (C15H23O7-)	334.186	88.03985 (C3H6NO2+), 99.08088 (C6H11O+), 186.11247 (C9H16NO3+), 204.12335 (C9H18NO4+), 218.10239 (C9H16NO5+)	C15H26NO7-; has corresponding peak in ES+; not in growth medium; belongs to family of puzzling amino derivatives
ascr	bhas#9	1.61804	263.114	59.01257 (C2H3O2-), 73. 02821 (C3H5O2-), 115.03921 (C5H7O3-), 245.10316 (C11H17O6-)	287.11	157.04724 (C5H10NaO4+)	C11H19O7-; also diff. in growth medium; has corresponding peak in ES+ (Na adduct, 287.11014)
		2.19	249.098				C10H17O7-; found manually looking for bhas#11, but it's too late for it; not in XCMS; also diff. in growth medium
S		3.4317	304.087	63.96117 (SO2-), 74.00575 (C2H4NS-), 84.04430 (C4H6NO-), 113.04218 (C6H9S-), 116.01672 (C4H6NSO-), 128.03465 (C5H6NO3-), 175.04337 (C7H11SO3-), 178.01790 (C5H8NSO4-)	306.101	84.04497 (C4H6NO+), 88.03983 (C3H6NO2+), 130.04997 (C5H8NO3+)	C12H18NSO6-; has S; has corresponding peak in ES+; not in growth medium
		3.44	291.145				C13H23O7-; found manually looking for bhas#1, but it may be too late, based on bhas#9; not in XCMS; also diff. in growth medium
ascr/osas	osas#13	3.45658	841.303	78.95785 (PO3-), 96.96857 (H2PO4-), 152.99545 (C3H6PO5-), 171.00627 (C3H8PO6-), 444.16269 (C16H31NPO11-)	843.317	126.09169 (C7H12NO+), 144.10194 (C7H14NO2+)	C34H54N2PO20-; glucoside of GPE of osas#9; has corresponding peak in ES+ (843.31723); not in growth medium
		3.46941	370.137				C14H20N5O7-; not differential in ES- and ES+ on 9/2/16; not in growth medium
		3.62693	212.973	69.03333 (C4H5O-), 97.02843 (C5H5O2-), 113.02338 (C5H5O3-), 133.00554 (C5H6ClO2-), 141.01881 (C6H5O4-), 176.99593 (C6H6ClO4-)			C6H7Cl2O4-; unrelated to ascr#9, has 2 Cl; very little in growth medium
ascr		3.66375	374.219	73.02828 (C3H5O2-), 128.07094 (C6H10NO2-), 357.19171 (C18H29O7-)	376.233	99.08086 (C6H11O+), 130.08635 (C6H12NO2+), 246.16989 (C12H24NO4+)	C18H32NO7-; homolog of m/z 332 @ 1.57 min; has corresponding ES+ peak; also diff. in growth medium (small peak); belongs to family of puzzling amino derivatives
ascr/osas	osas#92	3.82624	679.25	78.95792 (PO3-), 96.96864 (H2PO4-), 152.99548 (C3H6PO5-), 171.00626 (C3H8PO6-), 214.04912 (C5H13NPO6-), 234. 07750 (C12H12NO4-), 370.12827 (C13H25NPO9-), 444.16376 (C16H31NPO11-), 661.23810 (C28H42N2PO14-)	681.264	83.04975 (C5H7O+), 126.09148 (C7H12NO+), 136.07576 (C8H10NO+), 144.10199 (C7H14NO2+), 236.09113 (C12H14NO4+), 316.11551 (C10H23NPO8+)	C28H44N2PO15-; GPE of osas#9; has corresponding peak in ES+; not in growth medium
ascr		3.83146	333.156	73.02825 (C3H5O2-), 87.00761 (C3H3O3-), 315.14514 (C15H23O7-)			C15H25O8-; not in ES+; not in growth medium
ascr/osas	osas#15	3.94131	567.256	73.02833 (C3H5O2-), 86.02363 (C3H4NO2-), 159.06607 (C7H11O4-), 315.14529 (C15H23O7-), 332.17200 (C15H26NO7-)	569.271	95.04970 (C6H7O+), 99.08087 (C6H11O+), 119.04942 (C8H7O+), 136.07573 (C8H10NO2+), 218.08138 (C12H12NO3+), 236.09196 (C12H14NO4+), 348.14420 (C18H22NO6+)	C27H39N2O11-; related to 332.17215 based on MS/MS, its analog with oct-suc attached to 4'-position; has corresponding peak in ES+; not in growth medium
		3.96743	701.351				maybe in growth medium?; p.38, need to check 293.15115 --> 293.15115 is not diff. Fishy.
ascr/osas	osas#91	4.28943	561.223	73.02827 (C3H5O2-), 98.02370 (C4H4NO2-), 99.00785 (C4H3O3-), 107.04919 (C7H7O-), 119.04951 (C8H7O-), 135.04468 (C8H7O2-), 160.09793 (C7H14NO3-), 216.06636 (C12H10NO3-), 234.07727 (C12H12NO4-), 290.16089 (C13H24NO6-)	549.243	62.06076 (C2H8NO+), 144.10199 (C7H14NO2+), 166.08386 (C7H13NaNO2+), 176.06816 (C8H11NaNO2+), 184.09436 (C7H15NaNO3+), 212.08916 (C8H15NaNO4+), 226.10486 (C9H17NaNO4+), 276.08420 (C12H15NaNO5+), 296.14679 (C13H23NaNO5+)	C25H37N2O10-; HCl adduct of 525.24634; N-ethanolamide of osas#9; has corresponding peaks in ES+ (527.26093 and Na adduct 549.24274); not in growth medium
GPE		4.31615	424.071	78.95785 (PO3-), 96.96861 (H2PO4-), 152.99554 (C3H6PO5-), 171.00618 (C3H8PO6-), 278.08017 (C1oH17NPO6-), 314.05753 (C10H18ClNPO6-), 352.11713 (C13H23NPO8-), 388.09390 (C13H24ClNPO8-)			C13H25Cl2NPO8-; contains 2 Cl; GPE of C8 fatty acid; not in ES+; not in growth medium
ascr/osas	osas#17	4.32464	644.257	73.02825 (C3H5O2-), 93.03352 (C6H5O-), 98.02369 (C4H4NO2-), 99.04407 (C5H7O2-), 107.04926 (C7H7O-), 119.04942 (C8H7O-), 135.04453 (C8H7O2-), 190.08771 (C11H12NO2-), 216.06660 (C12H10NO3-), 234.07715 (C12H12NO4-), 247.11862 (ascr#9), 482.20258 (C23H32NO10-, osas#9)	528.20850, 510.19763	101.02370 (C4H5O3+), 119.04937 (C8H7O+), 136.07573 (C8H10NO+), 172.07581 (C11H10NO+), 190.12263 (C12H16NO+), 200.07111 (C12H10NO2+), 218.08116 (C12H12NO3+), 236.09163 (C12H14NO4+), 290.13840 (C16H20NO4+), 348.14407 (C18H22NO6+)	C29H42NO15-; glucoside of osas#9; 2peaks (4.30 and 4.48 min) has NH3, Na adducts, and 510 fragment in ES+; not in growth medium
ascr/osas	osas#18	4.5	644.257	73.02825 (C3H5O2-), 93.03352 (C6H5O-), 98.02369 (C4H4NO2-), 99.04407 (C5H7O2-), 107.04926 (C7H7O-), 119.04942 (C8H7O-), 133.02867 (C8H5O2-) 190.08771 (C11H12NO2-), 216.06660 (C12H10NO3-), 247.11862 (ascr#9), 464.19177 (C23H30NO9-)	528.208		C29H42NO15-; glucoside of osas#9;
GPE		4.43831	396.18	78.95783 (PO3-), 96.96854 (H2PO4-), 152.99551 (C3H6PO5-), 171.00624 (C3H8PO6-), 322.14288 (C13H25NPO6-)	398.194	208.16960 (C13H22NO+), 226.18005 (C13H24NO2+)	C16H31NO8P-; GPE of C11 fatty acid; has corresponding peak in ES+; not in growth medium
ascr/osas	osas#4	4.67	678.255	98.02370 (C4H4NO2-), 119.04943 (C8H7O-), 135.04457 (C8H7O2-), 216.06665 (C12H10NO3-), 234.07722 (C12H12NO4-)	661.319	136.07571 (C8H10NO+), 218.08122 (C12H12NO3+), 236.09161 (C12H14NO4+), 348.14410 (C18H22NO6+), 510.19757 (C24H32NO11+)	C30H45ClNO14-; HCl adduct of 642, C30H44NO14-; has corresponding FA adduct, 688.28418; glucoside of osas#2; 2 peaks (4.67 and 4.88 min); has corresponding peak in ES+ (NH3 adduct, 661); not in growth medium
ascr/osas	osas#19	4.87	678.255	216.06665 (C12H10NO3-), 234.07722 (C12H12NO4-)			C30H45ClNO14-; HCl adduct of 642, C30H44NO14-; has corresponding FA adduct, 688.28418; glucoside of osas#2; 2 peaks (4.67 and 4.88 min); has corresponding peak in ES+ (NH3 adduct, 661); not in growth medium
ascr	hbas#13	4.73	529.194	73.02820 (C3H5O2-), 93.03349 (C6H5O-), 137.02362 (C7H5O3-), 367.13962 (C18H23O8-)			C24H33O13-; glucoside of hbas#9
		4.58	319.176				C15H27O7-; 2 small peaks close to each other; found manually when looking for bhas#10, but this is too late for it; not in XCMS; also diff. in growth medium
ascr		4.88137	383.148	78.95792 (PO3-)			C15H28PO9-; phosphate of ascr#10; also diff. in growth medium, 4.3, 4.8, 5.05, and 5.15 min
		4.89888	448.219	71.01270 (C3H3O2-), 73.02835 (C3H5O2-), 85.02843 (C4H5O2-), 88.03938 (C3H6NO2-), 99.04420 (C5H7O2-), 127.03946 (C6H7O3-), 146.08189 (C6H12NO3-), 301.12952 (C14H21O7-)	450.233		C20H34NO10-; has corresponding peak in ES+; not in growth medium
GPE		4.92438	340.153	78.95784 (PO3-), 96.96854 (H2PO4-), 152.99551 (C3H6PO5-), 171.00624 (C3H8PO6-), 266.11627 (C10H21NPO5-)			C13H27NPO7-; has small diff. peak in ES+; there's a peak at 5.1 in growth medium that's not diff.
		4.93455	523.23				C25H35N2O10-, no good MS/MS; also diff. in growth medium (small peak, not pretty); since RT is the same as for 521.21423, this may be 13C2 isotope of it; p.40
ascr	ascr#81	4.9434	521.214	73.02827 (C3H5O2-), 92.04945 (C6H6N-), 128.03458 (C5H6NO3-), 135.05571 (C7H7N2O-), 136.03976 (C7H6NO2-), 161.07162 (C9H9N2O-), 177.10316 (C10H13N2O-), 203.08263 (C11H11N2O2-), 221.09315 (C11H13N2O3-), 392.17169 (C20H26NO7-), 477.22397 (C24H33N2O8-), 503.20401 (C25H31N2O9-)	393.166	109.06512 (C7H9O+), 120.04458 (C7H6NO+), 246.11237 (C14H16NO3+)	C25H33N2O10-; ascr#8 + Glu; has corresponding peak in ES+ (393 fragment); also diff. in growth medium
S		5.00358	346.134	63.96117 (SO2-), 73.98494 (C2H2SO-), 84.04433 (C4H6NO-), 99.98527 (C3H2NSO-), 115.00900 (C4H5NSO-), 160.00723 (C5H6NSO3-), 177.01007 (C5H7NSO4-), 185.11824 (C10H17O3-)	348.148	74.00657 (C2H4NS+), 92.01695 (C2H6NSO+), 120.01160 (C3H6NSO2+), 120.99564 (C3H5SO3+), 138.02191 (C3H8NSO3+), 151.11176 (C10H15O+), 162.02190 (C5H8NSO3+), 169.12224 (C10H17O2+), 180.03244 (C5H10NSO4+)	C15H24NSO6-; has S; homolog of 304.08655, though fragmentation looks very different; has corresponding peak in ES+; not in growth medium
ascr		5.07113	463.22	59.01261 (C2H3O2-), 71.01261 (C3H3O2-), 73.02829 (C3H5O2-), 85.02836 (C4H5O2-), 101.02341 (C4H5O3-), 113.02342 (C5H5O3-)			C21H35O11-; glucoside of ascr#3; check its HCl adduct; also diff. in growth medium
		5.10524	241.005	125.06013 (C7H9O2-), 137.00140 (C4H6ClO3-), 157.00751 (C7H6ClO2-), 161.03720 (C7H10ClO2-), 169.05045 (C8H9O4-), 205.02727 (C8H10ClO4-)			C8H11Cl2O4-; has 2 Cl, first HCl adduct is 205.02768; C8 diacid with 2 double bonds; homolog of 212.97305 @ 3.63 min; very small in growth medium (diff?)
ascr		5.21632	465.235	59.01256 (C2H3O2-), 71.01261 (C3H3O2-), 73.02828 (C3H5O2-), 85.02850 (C4H5O2-), 89.02345 (C3H5O3-), 101.02354 (C4H5O3-), 113.02370 (C5H5O3-), 155.10762 (C9H15O2-), 173.11816 (C9H17O3-), 303.18134 (C15H27O6-, ascr#10)			C21H37O11-; glucoside of ascr#10, check HCl adduct; also diff. in growth medium
GPE		5.25017	418.141	78.95785 (PO3-), 96.96861 (H2PO4-), 152.99548 (C3H6PO5-), 171.00623 (C3H8PO6-), 214.04825 (C5H13NPO6-), 308.12650 (C12H23NPO6-), 382.16367 (C15H29NPO8-)			C15H30ClNPO8-; HCl adduct; 5.25 and 5.93 min; GPE of C10 fatty acid; 5.93 min peak also has 140 and 214 fragments, maybe HCl adduct of oxea#10; not in ES+, but there's a peak with m/z 384.17906 (ES+) at 5.25 min that's in FCS1 but not in N2; not in growth medium
		5.25892	471.188		490.229	197.08083 (C10H13O4+), 293.13824 (C16H21O5+)	C22H31O11-; has corresponding double peak in ES+ (ammonium adduct, 490.22928, and smaller Na adduct 495.18463); also diff. in growth medium (double peak)
GPE		5.32971	412.211	78.95782 (PO3-), 96.96856 (H2PO4-), 152.99547 (C3H6PO5-), 171.00623 (C3H8PO6-), 338.17395 (C14H29NPO6-)	414.226	98.06045 (C5H8NO+), 224.20087 (C14H26NO+), 242.21132 (C14H28NO2+)	C17H35NPO8-; has corresponding peak in ES+ (double peak); peak with this mass around 5.9 min is diff. in growth medium
GPE		5.48565	410.196	78.95782 (PO3-), 96.96856 (H2PO4-), 152.99547 (C3H6PO5-), 171.00623 (C3H8PO6-)			C17H33NPO8-; peaks at 5.27 and 5.47 min, MS/MS supports phosphate, same formula as oxea#12 [Sci.Rep.2015], but elutes earlier; peak around 5.6 min is also diff. in growth medium
ascr/osas	osas#7	5.48829	508.22	73.02835 (C3H5O2-), 98.02373 (C4H4NO2-), 119.04948 (C8H7O-), 135.04462 (C8H7O2-), 216.06659 (C12H10NO3-), 234.07704 (C12H12NO4-), 273.13449 (C13H21O6-, ascr#7)	532.216	176.06828 (C8H11NaNO2+), 276.08411 (C12H15NaNO5+), 388.13699 (C18H23NaNO7+)	C25H34NO10-; only at 5.48 min, has Na adduct peak in ES+ (532.21613); not in growth medium
		5.55783	273.171	59.01261 (C2H3O2-), 115.03916 (C5H7O3-), 139.11215 (C9H15O-)			C14H25O5-; several peaks at 5.44, 5.54, 5.65, 5.73 min; has small peaks in ES+ corresponding to Na adducts; not in growth medium
ascr/osas	osas#1	5.57368	510.235	73.02824 (C3H5O2-), 82.02866 (C4H4NO-); 98.02371 (C4H4NO2-), 99.00780 (C4H3O3-); 119.04945 (C8H7O-), 121.02873 (C7H5O2-); 123.04453 (C7H7O2-), 127.07574 (C7H11O2-), 133.02895 (C8H5O2-), 216.06650 (C12H10NO3-), 234.07719 (C12H12NO4-), 275.14993 (C13H23O6-, ascr#1)	534.232	176.06828 (C8H11NaNO2+), 276.08411 (C12H15NaNO5+), 388.13699 (C18H23NaNO7+)	C25H36NO10-; osas#1; has 348.14453 fragment and Na adduct (534.23187) in ES+; not in growth medium
GPE		5.59273	456.238	78.95782 (PO3-), 96.96854 (H2PO4-), 152.99553 (C3H6PO5-), 171.00627 (C3H8PO6-), 214.04861 (C5H13NPO6-)	458.252	86.06060 (C4H8NO+), 268.22699 (C16H30NO2+), 286.23755 (C16H32NO3+)	C19H39NPO9-; phosphate supported by MS/MS; GPE of C14 fatty acid (?); has corresponding peak in ES+; there's another peak of the same mass at 6.22 min, which is present in FCS1 but not in N2; there're two peaks, at 5.8 and 6.2, which are present in FCS1 growth medium but not in N2 growth medium
		5.60845	476.251	71.01267 (C3H3O2-), 99.04410 (C5H7O2-), 127.07557 (C7H11O2-), 146.08179 (C6H12NO3-), 275.15018 (C13H23O6-), 329.16028 (C16H25O7-)	478.265	90.05545 (C3H8NO2+), 184.09676 (C9H14NO3+), 202.10744 (C9H16NO4+), 220.11797 (C9H18NO5+), 332.17029 (C15H26NO7+)	C22H38NO10-; has corresponding peak in ES+; not in growth medium
S		5.63745	372.149	63.96117 (SO2-), 73.98197 (C2H2SO-), 84.04438 (C4H6NO-), 99.98528 (C3H2NSO-), 115.00896 (C4H5NSO-), 160.00719 (C5H6NSO3-), 177.01004 (C5H7NSO4-), 211.13400 (C12H19O3-)	374.163	74.00655 (C2H4NS+), 120.01163 (C3H6NSO2+), 138.02196 (C3H8NSO3+), 162.02196 (C5H8NSO3+), 180.03249 (C5H10NSO4+)	C17H26NSO6-; has S; has corresponding peak in ES+; not in growth medium
ascr	nuclas#33, 34	5.75088	695.291	72.00783 (C2H2NO2-), 74.02348 (C2H4NO2-), 100.00296 (C3H2NO3-), 118.05013 (C4H8NO3-), 160.02628 (C6H2N5O-)	697.305	136.06183 (C5H6N5+), 162.04111 (C6H4N5O+), 281.09924 (C10H13N6O4+), 287.14908 (C14H23O6+)	thas corresponding peak in ES+; also diff. in growth medium (two peaks, 5.3 and 5.7 min, tade#3.1 and 3.2)
GPE		5.77705	424.211	78.95782 (PO3-), 96.96854 (H2PO4-), 152.99553 (C3H6PO5-), 171.00633 (C3H8PO6-), 350.17386 (C15H29NPO6-)	426.226	254.21124 (C15H28NO2+)	C18H35NPO8-, presence of phosphate is supported by MS/MS; GPE of C13 fatty acid (?); has corresponding peak in ES+; not in growth medium;
		5.7945	255.02	139.07593 (C8H11O2-), 151.01729 (C5H8ClO3-), 175.05299 (C8H12ClO2-), 219.04298 (C9H12ClO4-)			C9H13Cl2O4-; has 2 Cl; homolog of 241.00450; not in ES+; not in growth medium
GPE		5.80322	426.227	78.95780 (PO3-), 96.96851 (H2PO4-), 152.99542 (C3H6PO5-), 171.00615 (C3H8PO6-), 352.18945 (C15H31NPO6-)	428.241	256.22733 (C15H30NO2+)	C18H37NPO8-; a little later than 424.21146 peak; presence of phosphate is supported by MS/MS; has corresponding peak in ES+; several small peaks in growth medium, not obviously diff.
ascr/osas	osas#20	5.78	700.32	73.02825 (C3H5O2-), 82.02863 (C4H4NO2-), 123.04437 (C7H7O2-), 133.02884 (C8H5O2-), 155.10735 (C9H15O2-), 173.11801 (C9H17O3-), 216.06662 (C12H10NO3-), 303.18134 (C15H27O6-, ascr#10), 520.25446 (C27H38NO9-)	528.20850, 510.19763	72.08144 (C4H10N+), 119.04937 (C8H7O+), 136.07570 (C8H10NO+), 218.08116 (C12H12NO3+), 236.09167 (C12H14NO4+), 348.14368 (C18H22NO6+)	5.78 and 5.92 min; glucosides of osas#10; has corresponding peak in ES+; not in growth medium
ascr/osas	osas#21	5.92	700.32	73.02825 (C3H5O2-), 82.02863 (C4H4NO2-), 123.04437 (C7H7O2-), 133.02884 (C8H5O2-), 155.10735 (C9H15O2-), 173.11801 (C9H17O3-), 216.06662 (C12H10NO3-), 303.18134 (C15H27O6-, ascr#10), 520.25446 (C27H38NO9-)	528.208		5.78 and 5.92 min; glucosides of osas#10; has corresponding peak in ES+; not in growth medium
GPE		5.87282	504.238	78.95781 (PO3-), 96.96851 (H2PO4-), 140.01126 (C2H7NPO4-), 152.99548 (C3H6PO5-), 171.00618 (C3H8PO6-), 214.04874 (C5H13NPO6-)	506.252	334.23740 (C20H32NO3+)	C23H39NPO9-, presence of phosphate is supported by MS/MS; in addition to common GPE fragments, also strong fragments 140.01126 and 214.04874; has corresponding peak in ES+; there's a peak at 6.1 min in growth medium, which is not diff.; MS/MS on ES+ peak gives only 334.23740 (C20H32NO3+)
		5.89072	514.186				HCl adduct, osas related, C24H33ClNO9-; not in growth medium
ascr/osas	osas#22	5.89072	550.163	98.02370 (C4H4NO2-), 99.00771 (C4H3O3-); 119.04945 (C8H7O-), 121.02872 (C7H5O2-); 135.04451 (C8H7O2-), 190.08725 (C11H12NO2-); 216.06657 (C12H10NO3-), 234.07710 (C12H12NO4-)	498.19	136.07576 (C8H10NO+), 218.08125 (C12H12NO3+), 236.09166 (C12H14NO4+), 348.14420 (C18H22NO6+),	C24H34Cl2NO9-; has 2 Cl, HCl adduct of 514.18561; osas related; has corresponding peak in ES+ (498, 538); not in growth medium
		5.9256	239.025				C9H13Cl2O3-; has 2 Cl, check if 167.07137 is diff (-2HCl); not in growth medium
		5.93433	418.141				HCl adduct, C15H30ClNO8P-, has phosphate based on MS/MS, also has 140 and 214 fragments, maybe HCl adduct of oxea#10; not in growth medium
S		6.05851	343.134		345.148	58.99575 (C2H3S+), 104.01679 (C3H6NSO+), 116.01688 (C4H6NSO+), 140.05286 (C7H10NS+), 168.04774 (C8H10NSO+), 172.07903 (C8H14NSO+), 196.04274 (C9H10NSO2+), 281.13171 (C14H21N2SO2+), 299.14227 (C14H23N2SO3+), 327.13712 (C15H23N2SO4+)	C15H23N2SO5-; 5.94 and 6.04 min, has S, no MS/MS in ES-; has corresponding peaks in ES+; very small peak in growth medium, but appears to be diff.
GPE		6.11019	442.141	78.95782 (PO3-), 96.96853 (H2PO4-), 140.01122 (C2H7NPO4-), 152.99548 (C3H6PO5-), 171.00616 (C3H8PO6-), 214.04875 (C5H13NPO6-), 388.15372 (C17H27NPO7-), 406.16357 (C17H29NPO8-)	444.156	272.14105 (C14H23O2NCl+)	C17H30ClNPO8-; 6.10 and 6.18 min, HCl adduct, has phosphate based on MS/MS, also has 140 and 214 fragments; has small corresponding peaks in ES+ (444.15555); MS/MS of 444.15555 in ES+ gives only 272.14105 (C14H23O2NCl+); not in growth medium
		6.17977	301.203	99.08054 (C6H11O-), 139.11227 (C9H15O-), 143.07088 (C7H11O3-), 183.10243 (C10H15O3-), 201.11340 (C10H17O4-)			C16H29O5-; has a peak corresponding to Na adduct in ES+ (325.19846), but at 6.4 min, not clear if it's the same thing; 201.11340 is a separate peak in ES- @ 6.01 min; gives 139, 183, 201 in MS/MS, not diff.; not in growth medium
GPE		6.19593	452.102	78.95783 (PO3-), 96.96857 (H2PO4-), 140.01120 (C2H7NPO4-), 152.99547 (C3H6PO5-), 171.00627 (C3H8PO6-), 214.04877 (C5H13NPO6-), 380.14795 (C15H27NPO8-), 416.12509 (C15H28ClNPO8-)			C15H29Cl2NPO8-; has 1 or 2 Cl, MS/MS overlaps with 452.24268; phosphate, 153, 171, -HCl, -2HCl in MS/MS ==> GPE of C10 fatty acid with 2 double bonds and OH group, but this RT is too late for this molecule: saturated ea#10 [Sci.Rep.2015] elutes at 6.4 min; there's a corresponding peak in ES+ (454.1167), but it's not diff, so maybe it's unrelated; not in growth medium
GPE		6.21482	452.243	78.95781 (PO3-), 96.96851 (H2PO4-), 152.99544 (C3H6PO5-), 171.00615 (C3H8PO6-)	454.257	282.24265 (C17H32NO2+)	C20H39NPO8-, MS/MS overlaps with 452.10220; has corresponsing peak in ES+, 454.25718; not in growth medium
GPE		6.22355	440.243	78.95781 (PO3-), 96.96853 (H2PO4-), 152.99544 (C3H6PO5-), 171.00618 (C3H8PO6-), 366.20477 (C16H33NPO6-)	442.257	98.06040 (C5H8NO+), 252.23201 (C16H30NO+), 270.24255 (C16H32NO2+)	C19H39NPO8-, presence of phosphate is supported by MS/MS; has corresponding peak in ES+, 442.25708, MS/MS in ES+ gives 98.06040 (C5H8NO+), 252.23201 (C16H30NO+), 270.24255 (C16H32NO2+); not in growth medium
GPE		6.23177	446.172	78.95784 (PO3-), 96.96852 (H2PO4-), 152.99541 (C3H6PO5-), 171.00616 (C3H8PO6-), 336.15781 (C14H27NPO6-), 410.19498 (C17H33NPO8-)			C17H34ClNPO8-; 6.14 and 6.30 min, HCl adduct, presence of phosphate is supported by MS/MS; not in growth medium
GPE		6.27588	434.091	78.95788 (PO3-), 152.99577 (C3H6PO5-), 171.00594 (C3H8PO6-), 362.13797 (C15H25NPO7-), 398.11340 (C15H26ClNPO7-)			C15H27Cl2NPO7-; has 2 Cl, presence of phosphate is supported by MS/MS; phosphate, 153, 171, -HCl, -2HCl in MS/MS ==> GPE of C10 fatty acid with 2 double bonds, but RT is too late; has very small corresponding peak in ES+; not in growth medium
GPE		6.3503	544.254	59.01267 (C2H3O2-), 71.01264 (C3H3O2-), 78.95789 (PO3-), 85.02838 (C4H5O2-), 89.02330 (C3H5O3-), 96.96855 (H2PO4-), 101.02345 (C4H5O3-), 113.02343 (C5H5O3-), 119.03423 (C4H7O4-), 152.99577 (C3H6PO5-), 333.05933 (C9H18PO11-)	546.268	212.20088 (C13H26NO+)	C22H43NPO12-; presence of phosphate is supported by MS/MS; glucoside, see glucose fragments in MS/MS ==> GPE glucoside; has corresponding peak in ES+, 546.26816, 3x diff.; MS/MS in ES+ gives 212.20088 (C13H26NO+); present in growth medium but not diff.
GPE		6.40675	368.185	78.95782 (PO3-), 96.96851 (H2PO4-), 152.99545 (C3H6PO5-), 171.00621 (C3H8PO6-), 294.14777 (C12H25NPO5-)	370.199	198.18527 (C12H24NO+)	C15H31NPO7-, presence of phosphate is supported by MS/MS; ea#10 [Sci.Rep.2015]; has corresponding peak in ES+, 370.19931, MS/MS in ES+ gives 198.18527 (C12H24NO+); also diff. in growth medium
sulfate		6.42012	281.143	96.95911 (HSO4-)			C12H25SO5-; may have S; not in ES+; present in growth medium but not diff.
		6.42478	438.144				NaCl adduct of 380.18481, no MS/MS; not in growth medium
GPE		6.43305	380.185	78.95786 (PO3-), 96.96860 (H2PO4-), 152.99556 (C3H6PO5-), 171.00627 (C3H8PO6-), 306.14774 (C13H25NPO5-)	382.199	210.18518 (C13H24NO+)	C16H31NPO7-, presence of phosphate is supported by MS/MS; has corresponding peak (doublet) in ES+, 382.19931, it's only 2-3x diff.; MS/MS in ES+ gives 210.18518 (C13H24NO+); not in growth medium
		6.45088	225.113	163.11259 (C11H15O-), 181.12340 (C11H17O2-)			C12H17O4-; also diff. in growth medium
		6.45943	470.216	78.95783 (PO3-), 96.96856 (H2PO4-), 259.02261 (C6H12PO9-), 308.16348 (C13H27NPO5-)			C19H37NPO10-; maybe glucose-phosphate-ethanolamide-C11 fatty acid; small peaks present in growth medium, but not diff.; not in ES+
ascr		6.48556	375.239				C19H35O7-; bhas#22; also diff. in growth medium; p.48, 91
sulfate		6.58962	279.127	96.95911 (HSO4-)			C12H23SO5-; has S; present in growth medium, but not diff.
		6.69934	227.129	97.06491 (C6H9O-), 165.12825 (C11H17O-), 183.13882 (C11H19O2-), 209.11833 (C12H17O3-)			C12H19O4-; also diff. in growth medium
GPE		6.72132	382.201	78.95795 (PO3-), 96.96865 (H2PO4-), 152.99550 (C3H6PO5-), 171.00623 (C3H8PO6-), 308.16330 (C13H27NPO5-)	384.215	212.20082 (C13H26NO+)	C16H33NPO7-, presence of phosphate is supported by MS/MS; has corresponding peak in ES+, 384.21524, only 3x diff.; MS/MS in ES+ gives 212.20082 (C13H26NO+); not diff. in growth medium; but there's another peak with the same mass at 5.9 min which is present in FCS1 growth medium but not N2 growth medium
GPE		6.74654	436.107	78.95782 (PO3-), 96.96848 (H2PO4-), 152.99545 (C3H6PO5-), 171.00623 (C3H8PO6-), 290.11664 (C12H21NPO5-), 364.15302 (C15H27NPO7-), 400.12967 (C15H28ClNPO7-)	438.122	194.15393 (C12H20NO+), 266.10703 (C12H22ONCl2+)	C15H29Cl2NPO7-; has 2 Cl --> C15H27NO7P-; phosphate, 153, 171, -HCl, -2HCl, -74 after loss of 2 HCl in MS/MS ==> GPE of C10 fatty acid with 2 double bonds; however it elutes later than ea#10 with fully saturated chain (6.71 vs 6.37 min); maybe a fragment? but has corresponding peak in ES+, 438.12153; MS/MS in ES+ gives 194.15393 (C12H20NO+) and 266.10703 (C12H22ONCl2+); not in growth medium
GPE		6.76384	462.227	78.95785 (PO3-), 96.96857 (H2PO4-), 152.99561 (C3H6PO5-), 171.00629 (C3H8PO6-)	464.242	274.21619 (C18H28NO+), 292.22681 (C18H30NO2+)	C21H37NPO8-; has P based on MS/MS; has corresponding peak in ES+, 464.24173; MS/MS in ES+ gives 274.21619 (C18H28NO+) and 292.22681 (C18H30NO2+); peak with this mass at 6.1 min is present and diff. in growth medium
GPE		6.94023	472.188	78.95782 (PO3-), 96.96861 (H2PO4-), 152.99547 (C3H6PO5-), 171.00626 (C3H8PO6-), 436.21048 (C19H35NPO8-)	474.202	248.20082 (C16H26NO+), 266.21118 (C16H28NO2+), 302.18796 (C16H29ClNO2+)	C19H36ClNPO8-; 6.50, 6.80, and 6.93 min, HCl adduct, presence of phosphate is supported by MS/MS; has corresponding peaks in ES+, 474.20246; not in growth medium
GPE		7.14125	582.269	59.01256 (C2H3O2-), 71.01260 (C3H3O2-), 78.95783 (PO3-), 89.02332 (C3H5O3-), 96.96854 (H2PO4-), 101.02341 (C4H5O3-), 113.02357 (C5H5O3-), 119.03416 (C4H7O4-), 152.99548 (C3H6PO5-), 171.00616 (C3H8PO6-), 333.05972 (C9H18PO11-)	584.284	250.21646 (C16H28NO+)	C25H45NPO12-; GPE glucoside; has corresponding peak in ES+, 584.28397, only 3x diff.; MS/MS in ES+ gives 250.21646 (C16H28NO+); also diff. in growth medium (double peak)
GPE		7.28098	606.27	59.01256 (C2H3O2-), 71.01258 (C3H3O2-), 78.95782 (PO3-), 89.02328 (C3H5O3-), 96.96855 (H2PO4-), 101.02338 (C4H5O3-), 113.02349 (C5H5O3-), 119.03416 (C4H7O4-), 152.99548 (C3H6PO5-), 171.00626 (C3H8PO6-), 333.05948 (C9H18PO11-)	608.284	274.21637 (C18H28NO+)	C27H45NPO12-; GPE glucoside; has corresponding peak in ES+, 608.28415; MS/MS in ES+ gives 274.21637 (C18H28NO+); also diff. in growth medium
		7.42277	532.233	78.95787 (PO3-), 96.96854 (H2PO4-), 370.17862 (C18H29NPO5-)			C24H39NPO10-; glucose-phosphate-ethanolamine-C16 fatty acid with 4 double bonds; not in ES+; small diff. peak at 7.2 min in growth medium
GPE		7.43728	474.204	78.95783 (PO3-), 96.96849 (H2PO4-), 152.99550 (C3H6PO5-), 171.00621 (C3H8PO6-), 438.22610 (C19H37NPO8-)			C19H38ClNPO8-; 7.29 and 7.44 min (there're 2 more peaks with the same mass - check if they're also differential in FCS1), HCl adduct, presence of phosphate is supported by MS/MS; there're small corresponding peaks in ES+; not in growth medium
GPE		7.52421	608.286	59.01255 (C2H3O2-), 71.01257 (C3H3O2-), 78.95782 (PO3-), 85.02837 (C4H5O2-), 89.02325 (C3H5O3-), 96.96856 (H2PO4-), 101.02342 (C4H5O3-), 113.02359 (C5H5O3-), 119.03427 (C4H7O4-), 152.99542 (C3H6PO5-), 171.00644 (C3H8PO6-), 333.05966 (C9H18PO11-)			C27H47NPO12-; FCS1 has m/z 608.28613, slightly shifted; 2 peaks - 7.49 and 7.76 min, GPE glucoside; small peaks in ES+, 2nd peak is not very diff.; 2nd peak is also diff. in growth medium
GPE		7.53217	596.285	59.01256 (C2H3O2-), 71.01261 (C3H3O2-), 78.95783 (PO3-), 89.02332 (C3H5O3-), 96.96854 (H2PO4-), 101.02345 (C4H5O3-), 152.99550 (C3H6PO5-), 333.06049 (C9H18PO11-)	598.3	264.23196 (C17H30NO+)	C26H47NPO12-; GPE glucoside; has corresponding peak in ES+, 598.29978; MS/MS in ES+ gives 264.23196 (C17H30NO+); also diff. in growth medium
EA		7.66795	280.169		246.207		C13H27ClNO3-; HCl adduct, ethanolamide of saturated C11 fatty acid with one OH group; has corresponding peak in ES+ (246.2068, this mass has another diff. peak at 5.5 min in ES+), but it's only 3x idff.; MS/MS in ES+ gives 62 for 7.5 min peak --> ethanolamide; 5.3 min peak is a doublet, 1st (smaller) peak has 62, 2nd has hydrocarbon ions and H2O loss; not in growth medium, but there's a peak with…
GPE		7.86215	632.285	59.01255 (C2H3O2-), 71.01259 (C3H3O2-), 78.95781 (PO3-), 89.02328 (C3H5O3-), 96.96852 (H2PO4-), 101.02338 (C4H5O3-), 113.02361 (C5H5O3-), 119.03419 (C4H7O4-), 140.01123 (C2H7NPO4-), 152.99545 (C3H6PO5-), 171.00592 (C3H8PO6-), 196.03804 (C5H11NPO5-), 214.04857 (C5H13NPO6-), 333.05920 (C9H18PO11-), 376.10150 (C11H23NPO11-)	634.299	300.23224 (C20H30NO+)	C29H47NPO12-; there's another peak with the same mass at 7.68 min that's present only in FCS1 but not in N2; GPE glucoside of C18 fatty acid with 5 double bonds; has corresponding peak in ES+; also diff. in growth medium
GPE		8.03537	610.301	59.01258 (C2H3O2-), 71.01263 (C3H3O2-), 78.95790 (PO3-), 89.02340 (C3H5O3-), 96.96866 (H2PO4-), 101.02349 (C4H5O3-), 113.02362 (C5H5O3-), 119.03426 (C4H7O4-), 152.99551 (C3H6PO5-), 171.00633 (C3H8PO6-), 333.05917 (C9H18PO11-)	612.314	278.24771 (C18H32NO+)	C27H49NPO12-; FCS1 has smaller peak of the same mass, which is shifted to 7.99 min; GPE glucoside, has a fragment in ES+ (450); somewhat diff. in growth medium
GPE		8.09616	598.301	59.01257 (C2H3O2-), 71.01258 (C3H3O2-), 78.95782 (PO3-), 89.02328 (C3H5O3-), 96.96854 (H2PO4-), 101.02338 (C4H5O3-), 113.02354 (C5H5O3-), 119.03410 (C4H7O4-), 152.99547 (C3H6PO5-), 171.00618 (C3H8PO6-), 333.05948 (C9H18PO11-)	600.315	98.06043 (C5H8NO+), 266.24771 (C17H32NO+)	C26H49NPO12-; GPE glucoside, has corresponding peak in ES+; diff. in growth medium
		8.43119	458.224				variable; C23H37NO7P-, presence of phosphate is supported by MS/MS; has substantial 140 and 214 fragments; not in ES+; also diff. in growth medium
11
13
31
			new: 77 features, of which 24 are also diff. in growth medium, 11 of which are in growth medium table; 25 is also in ES+ table; from 71 - 22 ascrs, 31 GPE
			total number of C elegans new short-chain ascrs
			86
		C elegans	total number of new unique compounds that are down or absent in FCS1 (not counting isomers)
			-245
			total number of new unique compounds that are up in FCS1 (not counting isomers)
			447
		P pacificus	total number of new unique compounds that are down or absent in RS2770 (not counting isomers)
			-156
			total number of new unique compounds that are up in RS2770 (not counting isomers)
			200

## Sheet: S3
Growth medium ES- peaks, low in daf-22									Peaks that are also diff. in L1 medium			Peaks that are also in L1 medium table			has corresponding peak in ES+ table
class	smid-db	rt (min)	m/z (ES-)	MS/MS (ES-)	m/z (ES+)	MS/MS (ES+)	comments		Peaks that are present but not diff. in L1 medium						manually added entries
		0.644543	376.102				has Cl, C12H23NO10Cl-; loses HCl in MS/MS; no corresponding FA adduct; seems to have corresponding peak in ES+ (378.11673), but it doesn't have 37Cl1 isotope peak; also has Na adduct (400.09805); not in L1 medium
		1.66604	379.93				has 2 or 3 Cl; C9H15O6FeCl3-; has corresponding peak in ES+ (without FeCl3), 221.10196, its ammonium and Na adducts, 238.12857 and 243.08394; present in only one N2 L1 medium sample; this is ascr#5 adduct; p.84
ascr	bhas#9	1.78743	263.114	59.01257 (C2H3O2-), 73. 02821 (C3H5O2-), 115.03921 (C5H7O3-), 245.10316 (C11H17O6-)	287.11	157.04724 (C5H10NaO4+)	C11H19O7-; has 59, 73, and 115 fragments in MS/MS; also diff. in L1 medium
		2.09724	216.088				4x diff.; has corresponding peak in ES+, also ~4x diff.; not in L1 medium; p. 92; not diff. on Apr.22, 2017
ascr	uglas#11	2.92378	667.188	78.95777 (PO3-), 96.96848 (H2PO4-), 124.01446 (C4H2N3O2-), 167.02077 (C5H3N4O3-), 178.02559 (C7H4N3O3-), 223.00130 (C6H8PO7-), 241.01166 (C6H10PO8-), 275.14966 (C13H23O6-, ascr#1), 293.05246 (C11H9N4O6-), 311.06277 (C11H11N4O7-), 391.02945 (C11H12N4PO10-), 409.03973 (C11H14N4PO11), 499.15857 (C19H32PO13-), 537.12195 (C18H26N4PO13-), 569.21106 (C24H33N4O12-), 624.17889 (C23H35N3PO15-)	669.20190, 539.13904	98.98456 (H4PO4+), 97.02879 (C5H5O2+), 127.03919 (C6H7O3+), 129.09111 (C7H13O2+), 169.03543 (C5H5N4O3+), 243.02618 (C6H12PO8+)	C24H36N4PO16-; ascr#1-glucose-phosphate-uric acid; has corresponding peak in ES+, 669.20190 and its fragment 539.13904; not in L1 medium
		3.25967	553.217				coincides with ascr#2P peak, has phosphate and ascr#2P in MS/MS ==> probably ascr#2P adduct
		3.34523	558.233				MS/MS may be contaminated by 558.27856 and 558.31421; MS/MS has phosphate and ascr#2P; peak is a little shifted from ascr#2P, but it seems to be an adduct of ascr#2P (325.10578) and 232.11893, which is e8 non-diff. peak, which elutes a little later but overlaps with ascr#2P; C22H41O13NP-; not in ES+; present in one L1 medium sample
ascr	uglas#1	3.7	587.221				C24H35N4O13-; ascr#1-glucose-uric acid
		3.74002	427.138				possible formula C16H28PO11-; MS/MS would be contaminated by 3 other peaks of similar heights around 427; not in ES+; not in L1 medium
ascr		3.82717	517.17	78.95777 (PO3-), 96.96849 (H2PO4-), 241.01221 (C6H10PO8-)			C19H34PO14-; has phosphate in MS/MS; looks like it also has phosphoglucose fragment (241.01221, C6H10PO8-), so it may be ascr#1+glucose+phosphate; not in ES+; not in L1 medium
		3.83579	723.214	78.95778 (PO3-), 96.96848 (H2PO4-), 114.05506, 128.03453, 167.02094 (C5H3N4O3-), 178.02570 (C7H4N3O3-)			uric acid derivative, has phosphate, not in ES+; not in L1 medium
		3.8574	649.32				ascr#4 adduct?; not in L1 medium
		3.86612	537.256				coicides with ascr#4 peak; also diff. in L1 medium
		3.86935	555.266				H2O off from 537.25555, peak coincides with 537.25555, coicides with ascr#4 peak; H2O adduct of 537.25555?; also diff. in L1 medium
ascr		3.87073	355.117	78.95777 (PO3-)			C13H24PO9-; has phosphate in MS/MS; ascr#1 phosphate; also diff. in L1 medium, although it's present a little bit in one of FCS1 L1 medium samples
		3.88357	740.326				MS/MS would be contaminated by nearby peaks of similar size; ascr#4 adduct?; not in L1 medium
		3.88751	241.027		243.042		possible formula C10H10PO5-; MS/MS would be contaminated by nearby peaks of similar size; there's a much bigger peak at 241.1196, MS/MS does contain phosphate peak but otherwise is useless; 2 ES+ samples have corresponding peak, 243.04189; tried MS/MS, but it's small and would be contaminated by several bigger nearby peaks; not in L1 medium
		4.31135	923.32	78.95778 (PO3-), 167.02072 (C5H3N4O3-),			uric acid derivative, has phosphate, not in ES+; not in L1 medium
ascr		4.45719	749.23	78.95776 (PO3-), 96.96847 (H2PO4-), 102.05496 (C4H8NO2-), 124.01448 (C4H2N3O2-), 128.03450 (C5H6NO3-), 167.02075 (C5H3N4O3-), 178.02559 (C7H4N3O3-), 186.12457 (C8H16N3O2-), 208.10902 (C10H14N3O2-), 227.10361 (C10H15N2O4-), 393.10526 (C16H17N4O8-), 470.29791, 491.08157, 581.20013	621.181	97.02879 (C5H5O2+), 98.98442 (H4PO4+), 127.03907 (C6H7O3+), 129.09117 (C7H13O2+), 167.08168 (C8H11N2O2+), 169.03531 (C5H5N4O3+), 209.0808 (C11H13O4+), 219.14922 (C13H19N2O+), 227.09126 (C11H15O5+), 229.15456 (C11H21N2O3+), 300.15515 (C13H22N3O5+), 307.05759 (C11H16PO8+), 337.16360 (C12H26N4PO5+), 341.18253 (C15H25N4O5+), 342.23871 (C17H32N3O4+), 362.17044 (C18H24N3O5+)	doesn't coincide with ascr#7; uric acid derivative, has phosphate, has corresponding peak (751.24442) and its -130 fragment in ES+, 621.18109; not in L1 medium
		4.5532	751.245	78.95777 (PO3-), 96.96848 (H2PO4-), 124.01422 (C4H2N3O2-), 127.05039 (C5H7N2O2-), 128.03445 (C5H6NO3-), 167.02060 (C5H3N4O3-), 178.02544 (C7H4N3O3-), 493.09698, 583.21722 (?)			uric acid derivative, has phosphate, not in ES+; not in L1 medium
		4.63648	785.229	78.95777 (PO3-), 124.01422 (C4H2N3O2-), 167.02060 (C5H3N4O3-)			uric acid derivative, has phosphate, not in ES+; not in L1 medium
ascr		4.64	381.132	78.95776 (PO3-)	211.037		C15H26PO9-; not in XCMS; ascr#3 phosphate?; also diff. in L1 medium (10x); has corresponding peak in ES+ (211.03685 fragment)
		4.64147	660.244				shifted from ascr#1; looks like adduct of ascr#3 phosphate (m/z 381.13177); not in L1 medium, although 381.13275 is present and diff. in L1 medium (10x, Aug.30)
		4.65033	763.272				looks like adduct of ascr#3 phosphate (m/z 381.13177); not in L1 medium
ascr	ascr#82	4.75574	650.258	73.02825 (C3H5O2-), 92.04943 (C6H6N-), 102.05498 (C4H8NO2-), 128.03450 (C5H6NO3-), 146.04530 (C5H8NO4-), 203.08250 (C11H11N2O2-), 221.09302 (C11H13N2O3-), 392.17139 (C20H26NO7-, ascr#8), 503.20291 (C25H31N2O9-), 521.21362 (C25H33N2O10-), 632.24597 (C30H38N3O12-)	652.272	120.04460 (C7H6NO+), 246.11238 (C14H16NO3+)	C30H40N3O13-; ascr#8-Glu-Glu; has corresponding peak in ES+; not in L1 medium
		4.79669	499.196				has Cl; 4.75 and 5.05 min; HCl adduct of ascr#3 glucoside; not in ES+; also diff. in L1 medium (e4 peak); p. 86
		4.79669	599.212	78.95778 (PO3-), 96.96848 (H2PO4-)			C24H40PO15-; 4.75 and 5.05 min, shifted from 499.19608; has phosphate ions in MS/MS for both peaks (strongest fragments); MS/MS of the first peak may be contaminated by several neighboring peaks; not in ES+; not in L1 medium
ascr		4.8147	383.148	78.95792 (PO3-)			C15H28PO9-; 4.35, 4.8, 5.05, and 5.15 min; all peaks have phosphate; peak @ 4.8 min (biggest) is ascr#10 phosphate
		4.82342	604.181	78.95778 (PO3-), 96.96849 (H2PO4-), 114.05508 (C5H8NO2-), 127.05049 (C5H7N2O2- ?), 129.10262 (C6H13N2O- ?), 131.04538 (C4H7N2O3- ?), 240.13531 (C11H18N3O3- ?), 258.14575 (C11H20N3O4- ?)	606.196		C25H35NPO14-; shifted from 383.14828; has phosphate, 114.05508 (C5H8O2N-), 240.13531 (C11H18N3O3-, are extra nitrogens from N2?), 258.14575 (C11H20O4N3-), 568.33478 (?) in MS/MS; has corresponding peak in ES+, 606.19577; tried MS/MS on it but the peak is small and MS/MS maybe contaminated; not in L1 medium
ascr		4.85394	574.171	78.95778 (PO3-), 96.96848 (H2PO4-), 358.07004 (C14H17NPO8-)	576.184	87.04459 (C4H7O2+), 95.04962 (C6H7O+), 98.98460 (H4PO4+), 118.06536 (C8H8N+), 127.03914 (C6H7O3+), 158.06021 (C10H8NO+), 172.07562 (C11H10NO+), 226.08620 (C14H12NO2+), 243.02664 (C6H12PO8+), 244.09686 (C14H14NO3+), 458.12155 (C19H25NPO10+)	C24H33NPO13-; 4.8 and 5.2 min; ascr#11-glucose-phosphate-indole; has corresponding peak in ES+; not in L1 medium
		4.88258	951.35	78.95779 (PO3-), 96.96850 (H2PO4-), 124.01435 (C4H2N3O2-), 167.02072 (C5H3N4O3-), 178.02536 (C7H4N3O3-), 675.19305, 693.20465, 783.32550	953.365	127.03922 (C6H7O3+), 137.09625 (C9H13O+), 281.13837 (C15H21O5+), 675.22778	uric acid derivative; has phosphate, has corresponding peak in ES+; not in L1 medium
ascr	uglas#3	4.91925	613.237	84.00776 (C3H2NO2-), 99.01884 (C3H3N2O2-), 124.01435 (C4H2N3O2-), 141.02994 (C5H5N2O3-), 167.02077 (C5H3N4O3-), 180.04128 (C7H6N3O3-), 268.05731 (C10H10N3O6-), 311.06326 (C11H11N4O7-)	615.252	127.03912 (C6H7O3+), 137.09621 (C9H13O+), 155.10675 (C9H15O2+), 169.03560 (C5H5N4O3+), 173.11771 (C9H17O3+), 187.10759 (C8H15N2O3+), 215.10280 (C9H15N2O4+), 281.13821 (C15H21O5+), 299.14908 (C15H23O6+), 317.16000 (C15H25O7+), 328.18646 (C15H26N3O5+), 441.27097 (C21H37N4O6+), 467.17691 (C20H27N4O9+)	C26H37N4O13-; uric acid derivative, shifted from 951.35046; ascr#3-glucose-uric acid; has corresponding peak in ES+; not in L1 medium
ascr		4.95428	638.233	71.01260 (C3H3O2-), 107.03544 (C4H3N4-), 115.00285 (C4H3O4-), 134.04654 (C5H4N5-), 162.07819 (C7H8N5-), 188.05774 (C8H6N5O-), 206.06824 (C8H8N5O2-)	640.247	129.10226 (C6H13N2O+), 136.06172 (C5H6N5+), 162.07738 (C7H8N5+), 188.05649 (C8H6N5O+), 192.05151 (C7H6N5O2+), 206.06705 (C8H8N5O2+), 234.06195 (C9H8N5O3+), 252.07259 (C9H10N5O4+), 259.11755 (C12H19O6+), 510.18301 (C21H28N5O10+)	C27H36N5O13-; adenine derivative; has corresponding peak in ES+; not in L1 medium
ascr		5.03325	792.273	78.95776 (PO3-), 96.96846 (H2PO4-)	794.286	136.06175 (C5H6N5+), 148.06194 (C6H6N5+), 262.09311 (C11H12N5O3+), 287.14896 (C14H23O6+), 378.08072 (C11H17N5PO8+)	C31H47N5PO17-; possibly ascr#3-glucose-phopshate-adenine-ribose; has corresponding peak in ES+; has phosphate; not in L1 medium
ascr		5.05025	640.249		642.263	136.06180 (C5H6N5+), 162.07738 (C7H8N5+), 252.07251 (C9H10N5O4+), 359.17099 (C18H23N4O4+), 428.25092 (C19H34N5O6+), 512.19836 (C21H30N5O10+)	related to 638.23297 above; MS/MS may be contaminated by 640.36841; has adenine fragment; has corresponding peak in ES+, 642.26322, its MS/MS is contaminated but it has 136.06180 (adenine), 162.07738 (C7H8N5+), 252.07251 (C9H10O4N5+), 359.17099 (C18H23O4N4+), 428.25092 (C19H34O6N5+), 512.19836 (-130, C21H30O10N5+); not in L1 medium
ascr		5.06296	463.219	59.01253 (C2H3O2-), 71.01257 (C3H3O2-), 73.02823 (C3H5O2-), 85.02837 (C4H5O2-), 101.02341 (C4H5O3-), 113.02359 (C5H5O3-)	482.26		C21H35O11-; ascr#3 glucoside, see HCl adduct 499.19608 (4.75 and 5.05 min; has corresponding NH3 adducts in ES+, 482.26001; also diff. in L1 medium (e4 peak); also diff. in L1 medium
ascr		5.0632	560.155	78.95789 (PO3-), 96.96860 (H2PO4-), 412.08038 (C17H19NPO9-)	562.169	127.03913 (C6H7O3+), 130.06519 (C9H8N+), 444.10501 (C18H23NPO10+)	C23H31NPO13-; phosphate ions and possible 412.08038 (C17H19O9NP-, -148) in MS/MS; has corresponding peak in ES+; not in L1 medium
EA		5.14696	256.156		258.17	152.10698 (C9H14NO+), 194.11757 (C11H16NO2+), 212.12811 (C11H18NO3+), 222.11237 (C12H16NO3+), 240.15915 (C13H22NO3+)	C13H22NO4-; 3x diff.; MS/MS may be contaminated by 255.82286 and 256.11969; has corresponding peak in ES+, 258.17048; present and ~2x diff. in L1 medium
		5.15508	632.213	78.95776 (PO3-), 96.96848 (H2PO4-)	634.227		C27H39NPO14-; has only phosphate peaks in MS/MS; has correposponding peak in ES+; not in L1 medium
		5.21184	497.098	78.95779 (PO3-), 96.96851 (H2PO4-)	499.112		C20H22N2PO11-; 5.2 and 5.8 min, 3x diff. when reran on Oct.14; has only phosphate peaks in MS/MS; MS/MS of 5.2 min peak may be contaminated by 497.25351; has corresponding peak in ES+, 499.11228, tried MS/MS, but the peaks are small and MS/MS is likely to be contaminated; not in L1 medium
		5.21994	564.186				C24H35ClNO12-; has Cl; MS/MS would be contaminated by 564.26031 (also has Cl); has corresponding peak in ES+, 530.22369; tried MS/MS, but don't see the peak; not in L1 medium
ascr		5.28477	435.224	59.01256 (C2H3O2-), 73.02819 (C3H5O2-), 85.02831 (C4H5O2-), 111.04420 (C6H7O2-), 113.02335 (C5H5O3-), 155.10727 (C9H15O2-), 173.11801 (C9H17O3-), 287.15033 (C14H23O6-), 305.16031 (C14H25O7-)			C20H35O10-; not in ES+; also diff. in L1 medium (e4-e5 peak)
		5.30906	634.192	78.95776 (PO3-), 96.96851 (H2PO4-), 223.00159 (C6H8PO7-), 497.14322 (C19H30PO13-)	636.207	109.06512 (C7H9O+), 120.04447 (C7H6NO+), 127.07549 (C7H11O2+)	C26H37NPO15-; has phosphate, not GPE; has corresponding peak in ES+; not in L1 medium
		5.33741	630.197	78.95778 (PO3-), 96.96852 (H2PO4-)	632.212		C27H37NPO14-; double peak, 5.30 and 5.35 min; only phosphate peaks in MS/MS; MS/MS spectrum of the second (smaller) peak would be contaminated by 630.31219; elutes later than more saturated peak, suggesting that it's C=O double bond; N2 has corresponding peak in ES+; not in L1 medium
		5.36574	350.175	78.95783 (PO3-), 96.96857 (H2PO4-), 140.01125 (C2H7NPO4-)	352.189	98.06043 (C5H8NO+), 236.20067 (C15H26NO+), 254.21118 (C15H28NO2+)	C15H29NPO6-; 10x diff.; has corresponding peak in ES+, 352.18903; not in L1 medium
ascr	iglas#91	5.37384	588.186	78.95776 (PO3-), 96.96845 (H2PO4-)	590.201	98.98453 (H4PO4+), 101.06011 (C5H9O2+), 118.06529 (C8H8N+), 127.03906 (C6H7O3+), 130.06509 (C9H8N+), 158.06007 (C10H8NO+), 226.08649 (C14H12NO2+), 244.09703 (C14H14NO3+), 256.22672 (C15H30NO2+), 362.15912 (C19H24NO6+), 472.13617 (C10H27NPO10+)	C25H35NPO13-; only phosphate peaks in MS/MS; has corresponding peak in ES+, 590.20087, which has small ammonium and Na adducts; ES+ peak has coeluting -130 peak (460.13748); looks like ascr#9-glucose-phosphate-indole; also diff. in L1 medium (5.7 min, e4 peak)
		5.41868	779.278	78.95778 (PO3-), 96.96849 (H2PO4-), 167.02077 (C5H3N4O3-)			uric acid derivative, has phosphate, not in ES+; not in L1 medium
ascr	iglas#11 (2nd peak)	5.44283	616.217	78.95778 (PO3-), 96.96849 (H2PO4-), 2nd peak also has 340.05902 (C14H15NPO6-), 358.06961 (C14H17NPO8-)	488.16867, 618.23224	98.98457 (H4PO4+), 109.02872 (C6H5O2+), 118.06540 (C8H8N+), 127.03906 (C6H7O3+), 129.09109 (C7H13O2+), 154.06520 (C11H8N+), 158.05997 (C10H8NO+), 180.08072 (C13H10N+), 184.07574 (C12H10NO+), 198.09140 (C13H12NO+), 202.08638 (C12H12NO2+), 210.09100 (C14H12NO+), 226.08617 (C14H12NO2+), 237.11197 (C13H17O4+), 244.09689 (C14H14NO3+), 255.12274 (C13H19O5+), 262.10727 (C14H16NO4+), 335.08871 (C13H20PO8…	C27H39NPO13-; two peaks, 5.45 and 5.8 min; 2nd peak is ascr#1-glucose-phosphate-indole; has corresponding peak and -130 fragment in ES+; not in L1 medium
		5.48076	585.151	92.04934 (C6H6N-), 116.04958 (C8H6N-), 136.03961 (C7H6NO2-), 160.03989 (C9H6NO2-), 172.04019 (C10H6NO2-), 178.05067 (C9H8NO3-), 190.05072 (C10H8NO3-), 250.07254 (C12H12NO5-), 268.08231 (C12H14NO6-), 412.12393 (C18H22NO10-)	551.188	73.02906 (C3H5O2+), 85.02896 (C4H5O2+), 92.04992 (C6H6N+), 97.02882 (C5H5O2+), 120.04457 (C7H6NO+), 132.04445 (C8H6NO+), 134.06006 (C8H8NO+), 162.05481 (C9H8NO2+), 170.06010 (C11H8NO+), 180.06534 (C9H10NO3+), 198.05493 (C12H8NO2+), 216.06552 (C12H10NO3+), 234.07622 (C12H12NO4+), 252.08681 (C12H14NO5+), 270.09680 (C12H16NO6+), 282.09695 (C13H16NO6+), 378.11761 (C18H20NO8+), 396.12863 (C18H22NO9+)	C25H30ClN2O12-; has Cl; 6x diff.; has corresponding peak in ES+, 551.18833; not in L1 medium
ascr		5.49525	455.206	78.95777 (PO3-), 96.96849 (H2PO4-), 209.02197 (C6H10PO6-)	457.22		C19H36PO10-; phosphate of bhas#22?; has corresponding peak in ES+, 457.22022; tried MS/MS, but there're three small overlapping peaks in that area, useless; 4x diff. in L1 medium (e4 peak @ 5.65 min)
		5.51671	285.171	87.04401 (C4H7O2-), 115.07559 (C6H11O2-), 125.09640 (C8H13O-), 143.06897 (C7H11O3-), 155.10735 (C9H15O2-), 169.12308 (C19H17O2-), 241.18080 (C14H25O3-)	309.168	291.15640 (C15H24NaO4+)	C15H25O5-; has Na adduct in ES+, 309.16757; tried MS/MS, see only one H2O loss, no other fragments; not in L1 medium
		5.51734	530.18				C24H33ClNO10-; has Cl; poor fragmentation in MS/MS; has corresponding FA adduct, 540.20923; not in ES+; not in L1 medium
		5.58431	602.202		604.217		MS/MS maybe contaminated by 602.24481; has phosphate and ascr#1 ions in MS/MS; has corresponding peak in ES+, 604.21689; tried MS/MS on 604.21689(+), MS/MS would be contaminated, don't see any convincing fragments; not in L1 medium
ascr	nuclas#35, 36	5.65244	666.264	71.01255 (C3H3O2-), 107.03518 (C4H3N4-), 115.00274 (C4H3O4-), 134.04639 (C5H4N5-), 162.07800 (C7H8N5-), 188.05809 (C8H6N5O-), 206.06813 (C8H8N5O2-), 250.05795 (C9H8N5O4-), 338.11041 (C13H16N5O6-), 382.10068 (C14H16N5O8-)	668.278	113.05988 (C6H9O2+), 136.06180 (C5H6N5+), 148.06177 (C6H6N5+), 155.10663 (C9H15O2+), 162.07733 (C7H8N5+), 173.11732 (C9H17O3+), 188.05664 (C8H6N5O+), 192.05151 (C7H6N5O2+), 206.06723 (C8H8N5O2+), 234.06197 (C9H8N5O3+), 252.07254 (C9H10N5O4+), 287.14871 (C14H23O6+), 382.13580 (C15H20N5O7+), 417.21103 (C20H33O9), 538.21429 (C23H32N5O10+)	C29H40N5O13-; 5.25 and 5.65 min; adenine-containing ascr, homolog of 638.23298; has corresponding peak in ES+; not in L1 medium
ascr		5.67377	411.18	78.95777 (PO3-), 96.96845 (H2PO4-)	413.194	83.04971 (C5H7O+), 95.04955 (C6H7O+), 113.05999 (C6H9O2+), 149.13264 (C11H17+), 167.14304 (C11H19O2+), 185.15347 (C11H21O2+), 211.03659 (C6H12PO6+)	C17H32PO9-; 5.25, 5.65, 5.90, and 6.05 min, shifted from ascr#10; for all peaks phosphates are major (and only) ions in MS/MS; phosphate of ascr#18 (?); has corresponding peaks in ES+ (413.19410, 5.65 and 5.90 min) 5.8 and 7.0 min are present and diff. in L1 medium (e4-e5)
ascr	anglas#7	5.70315	590.202	92.04940 (C6H6N-), 136.03970 (C7H6NO2-), 453.15356 (C19H30ClO10-)	556.24	95.04960 (C6H7O+), 109.06513 (C7H9O+), 113.05999 (C6H9O2+), 120.04459 (C7H6NO+), 127.07548 (C7H11O2+), 138.05496 (C7H8NO2+), 146.02361 (C8H4NO2+), 162.05519 (C9H8NO2+), 172.07555 (C11H10NO+), 180.06519 (C9H10NO3+), 186.05501 (C11H8NO2+), 210.05490 (C13H8NO2+), 228.06540 (C13H10NO3+), 246.07628 (C13H12NO4+), 250.10721 (C13H16NO4+), 268.11755 (C13H18NO5+), 271.11731 (C13H19O6+), 289.12814 (C13H21O7…	C26H37ClNO12-; has Cl, a little shifted from ascr#10; has corresponding peak in ES+; not in L1 medium
ascr	iglas#71	5.70455	614.202	78.95777 (PO3-), 96.96847 (H2PO4-), 358.06989 (C14H17NPO8-)	616.217	109.06519 (C7H9O+), 118.06535 (C8H8N+), 127.03898 (C6H7O3+), 127.07549 (C7H11O2+), 130.06525 (C9H8N+), 144.08086 (C10H10N+), 172.07538 (C11H10NO+), 226.08644 (C14H12NO2+), 235.09691 (C13H15O4+), 243.02646 (C6H12PO8+), 244.09651 (C14H14NO3+), 262.10687 (C14H16NO4+), 370.16519 (C21H24NO5+), 388.17554 (C21H26NO6+)	C27H37NPO13-; ascr#7-glucose-phosphate-indole (elutes 0.12 min earlier than corresponding ascr#1 derivative, 2nd 616.21698 peak); has corresponding peak in ES+; not in L1 medium
		5.76331	334.18		300.217		C16H29ClNO4-; has Cl; no good fragments in MS/MS; has corresponding FA adduct, 344.20834; corresponding mass in ES+, 300.21729, but no MS/MS; did MS/MS but it would be contaminated by a nearby peak of equal height; see 62, so maybe it's an ethanolamide; not in L1 medium
ascr		5.77567	544.196	73.02822 (C3H5O2-), 116.04964 (C8H6N-), 247.11865 (C11H19O6-, ascr#9), 278.10324 (C14H16NO5-)			C25H35ClNO10-; has Cl; homolog of 530.18048 @ 5.52 min; has corresponding FA adduct, 554.22491 (C26H36O12N-, FA adduct of ascr#9-glucose-indole); 3 peaks?; no good fragments in MS/MS; at least one peak has corresponding peak in ES+; also diff. in L1 medium
ascr	anglas#1	5.78624	592.218	92.04939 (C6H6N-), 136.03969 (C7H6NO2-), 455.16901 (C19H32ClO10-)	558.256	95.04960 (C6H7O+), 111.08076 (C7H11O+), 113.06001 (C6H9O2+), 120.04460 (C7H6NO+), 129.09111 (C7H13O2+), 138.05499 (C7H8NO2+), 146.02357 (C8H4NO2+), 162.05463 (C9H8NO2+), 172.07555 (C11H10NO+), 180.06555 (C9H10NO3+), 228.06544 (C13H10NO3+), 237.11195 (C13H17O4+), 250.10730 (C13H16NO4+), 255.12253 (C13H19O5+), 268.11777 (C13H18NO5+), 273.13324 (C13H21O6+), 374.15930 (C20H24NO6+), 392.17081 (C20H26N…	C26H39ClNO12-has Cl; has corresponding peak in ES+, 558.25476; not in L1 medium
GPE		5.79512	412.211	78.95777 (PO3-), 96.96841 (H2PO4-), 152.99530 (C3H6PO5-), 171.00607 (C3H8PO6-)	414.225	98.06047 (C5H8NO+), 224.20096 (C14H26NO+), 242.21140 (C14H28NO2+)	C17H35NPO8-; strange looking peak; diff. peak @ 5.90 min on Oct.14, 6x diff.; has phosphate, 153, and 171 peaks in MS/MS ==> GPE; has corresponding peak in ES+, 414.22538, althought there're other peaks around, which aren't diff.; did MS/MS on 414.22538(+), there're many peaks in the area, but one of the bigger ones gives 98.06047 (C5H8ON+), 224.20096 (C14H26ON+), and 242.21140 (C14H28O2N+); also…
GPE		5.8267	530.238				~3x diff., 2x diff when reran on Oct.14; has phosphate, 153, 171, 333, and glucose peaks in MS/MS ==> GPE glucoside,C21H41O12NP- (glea#10 ?); has corresponding peak in ES+, 532.25223; ~4x diff.; MS/MS on 532.25223(+) on 12/25/16 gave 198.18529 (C12H24NO+); not in L1 medium; not diff. on Apr.24, 2017
ascr		5.88453	409.164	78.95780 (PO3-), 96.96854 (H2PO4-)	411.178	83.04975 (C5H7O+), 95.04975 (C6H7O+), 113.06001 (C6H9O2+), 137.09607 (C9H13O+), 183.13815 (C11H19O2+), 201.14886 (C11H21O3+), 211.03673 (C6H12PO6+)	C17H30PO9-; 5.5 and 5.9 min; only has phosphate peaks in MS/MS; unstaurated analog of 411.17960; has corresponding peak in ES+, 411.17838; not in L1 medium
EA		5.98164	310.18		276.217	62.06081 (C2H8NO+), 240.19566 (C14H26NO2+), 258.20624 (C14H28NO3+)	C14H29ClNO4-; has Cl, there're other peaks with the same mass nearby that aren't differential; overall, MS/MS signal is low, spectrum consists of fragments that don't make sense considering the molecular formula; has corresponding peak in ES+, 276.21748, although there're other peaks around in ES+, which aren't diff.; MS/MS on 276.21748(+) gave 62 and 2 H2O losses --> ethanolamide; not in L1 medi…
GPE		6.03127	438.227	78.95776 (PO3-), 96.96840 (H2PO4-), 152.99524 (C3H6PO5-), 171.00600 (C3H8PO6-), 364.18936 (C16H31NPO6-)	440.241	250.21649 (C16H28NO+), 268.22696 (C16H30NO2+)	C19H37NPO8-; has phosphate, 153, and 171 peaks in MS/MS ==> GPE; has corresponding peak in ES+, 440.2414; MS/MS gave 250.21649 (C16H28ON+) and 268.22696 (C16H30O2N+); 3x diff. in L1 medium
GPE		6.0967	368.185	78.95783 (PO3-), 96.96849 (H2PO4-), 152.99535 (C3H6PO5-), 171.00609 (C3H8PO6-), 294.14722 (C12H25NPO5-)	370.199	198.18520 (C12H24NO+)	C15H31NPO7-; 4-5x diff.; has phosphate, 153, and 171 peaks in MS/MS ==> GPE; has corresponding peak in ES+, 370.19928; MS/MS gave 198.18520 (C12H24ON+); also diff. in L1 medium
ascr	iglas#7	6.16957	570.212	73.02822 (C3H5O2-), 83.04903 (C5H7O-), 101.02339 (C4H5O3-), 111.04424 (C6H7O2-), 116.04966 (C8H6N-), 125.06000 (C7H9O2-), 273.13434 (C13H21O6-, ascr#7), 278.10318 (C14H16NO5-)	536.25	127.07551 (C7H11O2+), 130.06526 (C9H8N+), 230.11761 (C14H16NO2+), 254.11775 (C16H16NO2+), 289.12820 (C13H21O7+)	C27H37ClNO10-; HCl adduct, poor fragmentation; FA adduct gives better fragments; ascr#7-glucose-indole; has corresponding NH3 adduct in ES+, 536.2498; not in L1 medium
		6.17358	378.206	78.95777 (PO3-), 96.96846 (H2PO4-), 140.01117 (C2H7NPO4-)	380.22	98.06042 (C5H8NO+), 264.23199 (C17H30NO+), 282.24255 (C17H32NO2+)	C17H33NPO6-; homolog of 350.17453 at 5.48 min; has corresponding peak in ES+; not in L1 medium (?)
		6.228	477.107				~3x diff. when reran on Oct.14; 955.22198 is a dimer of 477.10693, C21H22O9N2P-; anthranilic acid-glucose-phosphate-indole; not in L1 medium; not diff. on Apr.24, 2017; p. 89
ascr	iglas#31	6.2629	642.233	78.95786 (PO3-), 96.96859 (H2PO4-), 358.06979 (C14H17NPO8-)	644.247	118.06532 (C8H8N+), 127.03913 (C6H7O3+), 130.06526 (C9H8N+), 137.09615 (C9H13O+), 226.08643 (C14H12NO2+), 281.13889 (C15H21O5+), 398.19626 (C23H28NO5+), 416.20734 (C23H30NO6+)	C29H41NPO13-; 6.25 and 6.75 min, ascr#3-glucose-phosphate-indole; has corresponding peak in ES+; not in L1 medium
ascr	iglas#1	6.29552	572.227	73.02820 (C3H5O2-), 116.04965 (C8H6N-), 127.07566 (C7H11O2-), 275.14975 (C13H23O6-, ascr#1), 278.10309 (C14H16NO5-)	538.265	95.04958 (C6H7O+), 111.08086 (C7H11O+), 118.06535 (C8H8N+), 130.06519 (C9H8N+), 144.08075 (C10H0N+), 158.06001 (C10H8NO+), 172.07564 (C11H10NO+), 184.07570 (C12H10NO+), 184.11212 (C13H14N+), 212.10701 (C14H14NO+), 230.11742 (C14H16NO2+), 254.11760 (C16H16NO2+), 272.12784 (C16H18NO3+), 484.23303 (C27H34NO7+)	C27H39ClNO10-; has Cl, ascr#1-glucose-indole; has corresponding peaks in ES+ (538.26520 and NH3 adduct 555.29181); also diff. in L1 medium (e4 peak)
GPE		6.34142	580.254	59.01253 (C2H3O2-), 71.01254 (C3H3O2-), 78.95779 (PO3-), 89.02324 (C3H5O3-), 96.96848 (H2PO4-), 101.02332 (C4H5O3-), 113.02347 (C5H5O3-), 119.03403 (C4H7O4-), 152.99541 (C3H6PO5-), 171.00626 (C3H8PO6-), 333.05923 (C9H18PO11-)	582.268	248.20082 (C16H26NO+)	C25H43NPO12-; has phosphate, 153, 171, 333, and glucose peaks in MS/MS ==> GPE glucoside; (glea#14 ?); has corresponding peak in ES+, 582.26804; MS/MS on 582.26804(+) gave 248.20082 (C16H26NO+); barely diff. in L1 medium (~2x, 6.65 min)
		6.3805	453.108	92.04941 (C6H6N-), 116.04967 (C8H6N-), 136.03972 (C7H6NO2-), 178.05064 (C9H8NO3-)	419.145	95.04994 (C6H6N+), 120.04459 (C7H6NO+), 97.02884 (C5H5O2+), 138.05496 (C7H8NO2+), 228.06548 (C13H10NO3+), 264.08649 (C14H14NO5+), 282.09708 (C13H16NO6+)	C20H22ClN2O8-; has Cl, has corresponding peak in ES+; only ~4x differential; not in L1 medium
		6.39226	225.114	59.01254 (C2H3O2-), 163.11240 (C11H15O-), 181.12320 (C11H17O2-)			C12H17O4-; peak at 6.45 min is diff, but a nearby peak at 6.55 is not; C12 diacid with 2 double bonds; not in ES+; also diff. in L1 medium
		6.46608	375.239				C19H35O7-, shifted from icas#9; bhas#22; p. 48, 91
		6.50046	426.134				has Cl; HCl adduct of icas#9, has all icas#9 fragments in MS/MS
GPE		6.66467	570.269	59.01252 (C2H3O2-), 71.01255 (C3H3O2-), 78.95779 (PO3-), 89.02321 (C3H5O3-), 96.96848 (H2PO4-), 101.02333 (C4H5O3-), 113.02354 (C5H5O3-), 119.03412 (C4H7O4-), 152.99535 (C3H6PO5-), 171.00612 (C3H8PO6-), 333.05914 (C9H18PO11-)	572.284	98.06041 (C5H8NO+), 112.07590 (C6H10NO+), 126.09136 (C7H12NO), 140.10696 (C8H14NO+), 238.21637 (C15H28NO+), 256.22693 (C15H30NO2+), 410.22925 (C18H37NPO7+)	C24H45NPO12-; 3x diff. when reran on Oct.14; has phosphate, 153, 171, 333, and glucose peaks in MS/MS ==> GPE glucoside of C13 fatty acid; has corresponding peak in ES+; present but not diff. in L1 medium
GPE		6.68415	582.269	59.01254 (C2H3O2-), 71.01256 (C3H3O2-), 78.95779 (PO3-), 89.02323 (C3H5O3-), 96.96850 (H2PO4-), 101.02335 (C4H5O3-), 113.02353 (C5H5O3-), 119.03412 (C4H7O4-), 152.99547 (C3H6PO5-), 171.00610 (C3H8PO6-), 333.05923 (C9H18PO11-)	584.284	250.21646 (C16H28NO+)	C25H45NPO12-; double peak, 6.65 and 6.75 min; has phosphate, 153, 171, 333, and glucose peaks in MS/MS ==> GPE glucoside; has corresponding peak in ES+; also diff. in L1 medium
GPE		6.73351	594.269	59.01254 (C2H3O2-), 71.01251 (C3H3O2-), 78.95778 (PO3-), 89.02315 (C3H5O3-), 96.96845 (H2PO4-), 101.02335 (C4H5O3-), 152.99541 (C3H6PO5-)	596.284	262.21640 (C17H28NO+)	C26H45NPO12-; 6.65 and 6.85 min, there's a peak at 7.6 min (Oct.14 rerun) with the same mass that's present in FCS1 but not in N2; has phosphate, 153, 171, 333, and glucose peaks in MS/MS ==> GPE glucoside; one of the peaks has corresponding peak in ES+, 596.28379; MS/MS on 596.28379 in ES+ gave 262.21640 (C17H28NO+); not in L1 medium
		6.76018	496.232	78.95782 (PO3-), 96.96849 (H2PO4-), 138.97931 (C2H4PO5-), 140.01134 (C2H7NPO4-), 259.02188 (C6H12PO9-), 316.16827 (C15H27NPO4-), 334.17877 (C15H29NPO5-), 376.18976 (C17H31NPO6-)			C21H39NPO10-; ~3-4x diff.; glucose-phosphate-ethanolamide-C13 fatty acid; has corresponding peak in ES+; present but not diff. in L1 medium (7.25 min);
EA		6.77772	292.169	86.02374 (C3H4NO2-), 142.08717 (C7H12NO2-), 256.19217 (C14H26NO3-)	258.207	62.06083 (C2H8NO+), 70.02945 (C3H4NO+), 88.03984 (C3H6NO2+), 128.07065 (C6H10NO2+), 179.14307 (C12H19O+), 198.18536 (C12H24NO+), 222.18533 (C14H24NO+), 240.19576 (C14H26NO2+)	C14H27ClNO3-; has Cl; ethanolamide of C12 fatty acid with one double bond and OH group; has corresponding peak in ES+; not in L1 medium
ascr		6.83002	598.244	301.16507 (C15H25O6-, ascr#3)	581.308	118.06526 (C8H8N+), 130.06512 (C9H8N+), 137.09599 (C9H13O+), 144.08081 (C10H10N+), 155.10666 (C9H15O2+), 160.07570 (C10H10NO+), 170.09636 (C12H12N+), 172.07545 (C11H10NO+), 198.09128 (C13H12NO+), 212.10680 (C14H14NO+), 226.08607 (C14H12NO2+), 317.15897 (C15H25O7+), 398.19669 (C23H28NO5+)	C29H41ClNO10-; has Cl, ascr#3-glucose-indole; has corresponding peak in ES+, 581.30774 (NH3 adduct); not in L1 medium
GPE		6.83358	606.269	59.01252 (C2H3O2-), 71.01254 (C3H3O2-), 78.95778 (PO3-), 89.02322 (C3H5O3-), 96.96848 (H2PO4-), 101.02332 (C4H5O3-), 113.02352 (C5H5O3-), 119.03402 (C4H7O4-), 152.99533 (C3H6PO5-), 171.00616 (C3H8PO6-), 333.05927 (C9H18PO11-)	608.283	274.21634 (C18H28NO+)	C27H45NPO12-; has phosphate, 153, 171, 333, and glucose peaks in MS/MS ==> GPE glucoside; has corresponding peak in ES+; also diff. in L1 medium
EA		6.86166	294.184		260.222	62.06082 (C2H8NO+)	C14H29ClNO3-; has Cl; has corresponding peak in ES+ (260); not in L1 medium
GPE		6.92824	618.269	59.01254 (C2H3O2-), 71.01257 (C3H3O2-), 78.95786 (PO3-), 89.02338 (C3H5O3-), 96.96867 (H2PO4-), 101.02345 (C4H5O3-), 113.02363 (C5H5O3-), 119.03423 (C4H7O4-), 140.01122 (C2H7NPO4-), 152.99542 (C3H6PO5-), 376.10193 (C11H23NPO11-)	620.284	286.21637 (C19H28NO+)	C28H45NPO12-; has phosphate, 153, 171, 333, and glucose peaks in MS/MS ==> GPE glucoside; has corresponding peak in ES+; also diff. in L1 medium (e4 peak @ 7.45 min)
GPE		7.00445	408.216	78.95779 (PO3-), 96.96850 (H2PO4-), 152.99539 (C3H6PO5-), 171.00613 (C3H8PO6-), 334.17902 (C15H29NPO5-)	410.231	98.06040 (C5H8NO+), 238.21635 (C15H28NO+)	C18H35NPO7-; has phosphate, 153, and 171 peaks in MS/MS ==> GPE; has corresponding peak in ES+, 410.23059; MS/MS on it (2 peaks, 6.81 and 7.24 (bigger) min) gave 98.06040 (C5H8ON+) and 238.21635 (C15H28ON+) for both peaks; present in L1 medium, variable, not diff. (7.5 min)
GPE		7.01318	420.216	78.95781 (PO3-), 96.96849 (H2PO4-), 152.99533 (C3H6PO5-), 171.00604 (C3H8PO6-)	422.231	250.21634 (C16H28NO+)	C19H35NPO7-; double peak, ugly peak but seems diff.; has phosphate, 153, and 171 peaks in MS/MS ==> GPE; has corresponding peak in ES+, 422.23072; did MS/MS on 422.23072(+), there're 4 small peaks around 7min, they all gave 250.21634 (C16H28ON+) as a fragment; present in L1 medium, variable, not diff. (7.6 min)
GPE		7.03935	596.285	59.01261 (C2H3O2-), 71.01265 (C3H3O2-), 78.95787 (PO3-), 89.02328 (C3H5O3-), 96.96852 (H2PO4-), 101.02336 (C4H5O3-), 113.02349 (C5H5O3-), 119.03413 (C4H7O4-), 152.99536 (C3H6PO5-), 333.05899 (C9H18PO11-)	598.299	98.06040 (C5H8NO+), 264.23203 (C17H30NO+)	C26H47NPO12-; has phosphate, 153, 171, 333, and glucose peaks in MS/MS ==> GPE glucoside; has corresponding peak in ES+; also diff. in L1 medium
		7.03954	969.508	59.01261 (C2H3O2-), 71.01265 (C3H3O2-), 78.95787 (PO3-), 89.02328 (C3H5O3-), 96.96852 (H2PO4-), 101.02336 (C4H5O3-), 113.02349 (C5H5O3-), 119.03413 (C4H7O4-), 152.99536 (C3H6PO5-), 333.05899 (C9H18PO11-)			small peak (e5), MS/MS has phosphate, 153, and 572, but it's not clear if those are authentic fragments or contamination from 572.28448 peak, which partially overlaps with 969.50787, but doesn't coincide with it; it's likely an adduct of 572.28448 and 396.21576 (also GPE), these peaks overlap, but neither of them is diff.; has corresponding peak in ES+, 971.52237; MS/MS on it on 12/25/16 gave 240…
		7.0568	981.508	59.01261 (C2H3O2-), 71.01265 (C3H3O2-), 78.95787 (PO3-), 89.02328 (C3H5O3-), 96.96852 (H2PO4-), 101.02336 (C4H5O3-), 113.02349 (C5H5O3-), 119.03413 (C4H7O4-), 152.99536 (C3H6PO5-), 333.05899 (C9H18PO11-)			~5x diff when reran on Oct.14; MS/MS has phosphate, 153, and 584, but it's not clear if those are authentic fragments or contamination from 584.28424 peak, which coincides with 981.50806; it could be adduct of 584 and 396 (also GPE), these peaks overlap; has corresponding peak in ES+, 983.52256; MS/MS on it on 12/25/2016 gave 98.06040 (C5H8ON+), 226.21666 (C14H28ON+), and 252.23192 (C16H30ON+); n…
GPE		7.2051	608.284	59.01253 (C2H3O2-), 71.01255 (C3H3O2-), 78.95778 (PO3-), 89.02322 (C3H5O3-), 96.96848 (H2PO4-), 101.02331 (C4H5O3-), 113.02353 (C5H5O3-), 119.03403 (C4H7O4-), 152.99538 (C3H6PO5-), 333.05933 (C9H18PO11-)	610.299	276.23196 (C18H30NO+)	C27H47NPO12-; has phosphate, 153, 171, 333, and glucose peaks in MS/MS (also on 12/25/16) ==> GPE glucoside; there're 2 peaks, 1st is not diff. but the 2nd is; has corresponding peak in ES+ (610.29856, also only 2nd peak is diff.); MS/MS on 610.29856 on 12/25/16 gave 276.23196 (C18H30ON+) for both peaks; also diff. in L1 medium (e4-e5 peak @ 7.5)
		7.2051	708.211				MS/MS would be contaminated by 708.49146; low peak, MS/MS has phosphate peak, but it's not clear if it comes from this mass or from much more abundant 608 nearby; not in ES+; not in L1 medium
EA		7.2063	344.2		310.238	62.06079 (C2H8NO+), 292.22681 (C18H30NO2+)	C18H31ClNO3-; double peak, 7.2 and 7.35 min, has Cl, MS/MS of the 2nd (higher) peak may be contaminated by 344.24448; no good fragments in MS/MS; has corresponding peak in ES+; not in L1 medium
GPE		7.22336	452.242	78.95779 (PO3-), 96.96850 (H2PO4-), 140.01120 (C2H7NPO4-), 152.99541 (C3H6PO5-), 171.00610 (C3H8PO6-), 214.04858 (C5H13NPO6-)	454.257	86.06058 (C4H8NO+), 264.23193 (C17H30NO+), 282.24258 (C17H32NO2+)	C20H39NPO8-; there's another peak with the same mass at 8.4 min, which is present in FCS1 but not in N2; hopefully it's not the same peak; 7.9 min on Oct.19, has phosphate, 153, and 171 peaks in MS/MS ==> GPE; also has small 140 and 214 peaks ==> beta-OH; maybe present in ES+, but peaks are shifted in such a way that it's not clear if it's diff.; MS/MS on 454.25684(+) gave 86.06058 (C4H8ON+), 264…
GPE		7.24433	632.285	59.01255 (C2H3O2-), 71.01254 (C3H3O2-), 78.95777 (PO3-), 89.02318 (C3H5O3-), 96.96841 (H2PO4-), 101.02326 (C4H5O3-), 113.02338 (C5H5O3-), 119.03394 (C4H7O4-), 140.01123 (C2H7NPO4-), 152.99524 (C3H6PO5-), 171.00607 (C3H8PO6-), 196.03780 (C5H11NPO5-), 214.04849 (C5H13NPO6-), 333.05911 (C9H18PO11-), 376.10114 (C11H23NPO11-)	634.299	98.06040 (C5H8NO+), 124.07578 (C7H10NO+), 300.23190 (C20H30NO+)	C29H47NPO12-; has phosphate, 153, 171, 333, 376, and glucose peaks in MS/MS ==> GPE glucoside corresponding to 470.23154 below; 10x diff.; has corresponding peak in ES+, 634.29929; MS/MS on 634.29929(+) gave hydrocarbon ions, 98.06040 (C5H8NO+), 124.07578 (C7H10NO+), and 300.23190 (C20H30NO+); also diff. in L1 medium
		7.26617	732.211				coincides with 632.28479 peak, maybe an adduct (see 708.21057 above); present in 2 L1 medium samples (e4)
EA		7.29233	334.216		300.253	62.06079 (C2H8NO+), 282.24252 (C17H32NO2+)	C17H33ClNO3-; has Cl, 7.3 and 9.1 min (7.3 peak is low in on of the samples), no good fragments in MS/MS; has corresponding FA adduct (344.24448), MS/MS of it on12/25/16 gives no fragments for 7.3 min peak and 100.03935 (C4H6NO2-) and 102.05505 (C4H8NO2-) for 9 min; has big (3e7) corresponding peak in ES+ (300.25333, C17H34O3N+), MS/MS on it gave 62 and H2O loss for both peaks --> ethanolamide; p…
GPE		7.35342	434.231	78.95783 (PO3-), 96.96848 (H2PO4-), 152.99535 (C3H6PO5-), 171.00610 (C3H8PO6-), 2nd peak also has 140.01114 (C2H7NPO4-), 214.04854 (C5H13NPO6-)	436.246	264.23203 (C17H30NO+)	C20H37NPO7-; 7.4 and 7.6 min; has phosphate, 153, and 171 peaks in MS/MS ==> GPE, 2nd peak also has 140 and 214 fragments, although based on the formula the fatty acid chain shouldn't have any substituents; has small corresponding peaks in ES+, 436.24591; MS/MS on it gave 264.23203 (C17H30ON+) for both peaks; present in 2 L1 medium samples (low e5)
GPE		7.37052	410.232	78.95777 (PO3-), 96.96846 (H2PO4-), 152.99533 (C3H6PO5-), 171.00606 (C3H8PO6-), 336.19443 (C15H31NPO5-)	412.246	240.23204 (C15H30NO+)	C18H37NPO7-; ~5x diff.; has phosphate, 153, and 171 peaks in MS/MS ==> GPE; has corresponding peak in ES+, 412.24613; there're 3 peaks with this mass around 7.8 min in ES+, 1st is the biggest; MS/MS on 412.24613 gave 240.23204 (C15H30ON+) for the first 2 peaks and 271.22650 (C16H31O3+) for the 3rd; present in L1 medium but variable, not diff.
GPE		7.38162	610.3	59.01254 (C2H3O2-), 71.01257 (C3H3O2-), 78.95781 (PO3-), 89.02328 (C3H5O3-), 96.96856 (H2PO4-), 101.02338 (C4H5O3-), 113.02358 (C5H5O3-), 119.03423 (C4H7O4-), 152.99541 (C3H6PO5-), 171.00616 (C3H8PO6-), 333.05923 (C9H18PO11-)	612.315	278.24765 (C18H32ON+)	C27H49NPO12-; 4x diff.; has phosphate, 153, 171, 333, and glucose peaks in MS/MS ==> GPE glucoside; has corresponding peak in ES+; also diff. in L1 medium
GPE		7.44344	598.301	59.01252 (C2H3O2-), 71.01255 (C3H3O2-), 78.95778 (PO3-), 89.02322 (C3H5O3-), 96.96844 (H2PO4-), 101.02332 (C4H5O3-), 113.02357 (C5H5O3-), 119.03406 (C4H7O4-), 152.99536 (C3H6PO5-), 171.00580 (C3H8PO6-), 333.05917 (C9H18PO11-)	600.315	266.24762 (C17H32ON+)	10x diff. on Oct.14; has phosphate, 153, 171, 333, and glucose peaks in MS/MS ==> GPE glucoside; C26H49O12NP-; corresponds to GPE m/z 436, see below; has corresponding peak in ES+; also diff. in L1 medium
GPE		7.57103	446.232	78.95776 (PO3-), 96.96846 (H2PO4-), 152.99536 (C3H6PO5-), 171.00606 (C3H8PO6-), 372.19406 (C18H31NPO5-)	448.246	276.23199 (C18H30NO+)	C21H37NPO7-; double peak, 2nd peak is diff., 1st one is not; both peaks have phosphate, 153, and 171 peaks in MS/MS ==> GPE; has corresponding peak in ES+, 448.24637; MS/MS on it (3 peaks around 7.5 min) gave 276.23199 (C18H30ON+) for all peaks; present in L1 medium, but variable, not diff.
GPE		7.58848	822.37	59.01249 (C2H3O2-), 71.01252 (C3H3O2-), 78.95777 (PO3-), 85.02821 (C4H5O2-), 89.02330 (C3H5O3-), 96.96840 (H2PO4-), 101.02325 (C4H5O3-), 113.02351 (C5H5O3-), 152.99548 (C3H6PO5-)	824.384	184.07336 (C5H15NPO4+), 328.26343 (C22H34NO+)	C37H61NPO17-; 4x diff; has phosphate, 153, 171, and glucose peaks in MS/MS ==> GPE glucoside; looks like diglucoside corresponding to 660.31573 (C31H51O12NP-), which elutes a little later; has corresponding peak in ES+, 824.38413; MS/MS gave 184.07336 (C5H15O4NP+, 662 doesn't have this fragment) and 328.26343 (C22H34ON+); not in L1 medium
		7.62345	466.258	1st peak has 59.01250 (C2H3O2-), 78.95769 (PO3-), 140.01103 (C2H7PO4-), 214.04845 (C5H13NPO6-), 269.21201 (C16H29O3-); 2nd peak has 78.95779 (PO3-), 96.96850 (H2PO4-), 140.01118 (C2H7PO4-), 152.99538 (C3H6PO5-), 171.00612 (C3H8PO6-), 214.04860 (C5H13NPO6-)			C21H41NPO8-; peaks shifted in a weird way, not clear if it's diff.; 2nd (bigger peak) is GPE; 1st peak has 59.01250, 78.95769, 140.01103, 214.04845, 269.21201 (C16H29O3-) fragments, which suggests that it may be lyso-PE of C16 fatty acid with beta-OH; not in ES+; 8.5 min peak is present in L1 medium, but variable, not diff.
GPE		7.6322	470.232	78.95778 (PO3-), 96.96850 (H2PO4-), 140.01118 (C2H7PO4-), 152.99538 (C3H6PO5-), 171.00612 (C3H8PO6-), 214.04858 (C5H13NPO6-)	472.246	124.07578 (C7H10NO+), 300.23193 (C20H30NO+)	C23H37NPO7-; has phosphate, 153, and 171 peaks in MS/MS ==> GPE; also has substantial 140 and 214 peaks (only 7 oxygens but maybe double bond is in the right position to facilitate formation of 140/214 fragmants); has corresponding peak in ES+, 472.24604; there're two peaks in ES+, 1st (bigger) coincides with 634.29865 (+162) and is probably its fragment; MS/MS on 472.24604(+) gave 124.07578 (C7H…
GPE		7.65844	472.247	78.95784 (PO3-), 96.96852 (H2PO4-), 152.99535 (C3H6PO5-), 171.00609 (C3H8PO6-), 2nd peak additionally has 140.01122 (C2H7PO4-), 214.04860 (C5H13NPO6-)	474.262	302.24777 (C20H32NO+)	C23H39NPO7-; gradually increasing; ~3x diff.; 8.5 and 9.3 min on Oct.19; has phosphate, 153, and 171 peaks in MS/MS ==> GPE; 2nd peak has substantial 140 and 214 fragments; has corresponding peak in ES+, 474.26194, also gradually increasing; MS/MS on 474.26194(+) gave 302.24777 (C20H32ON+); 8.5 min peaks are present in L1 medium, but not diff.
		7.66748	885.502				coicides with large 436.24716 peak, just one C off from 873.50226 (see below), so probably related to 436; only has phosphate, 153, 171, 436, and 448 in MS/MS; not in ES+; not in L1 medium
GPE		7.68493	436.247	78.95781 (PO3-), 96.96855 (H2PO4-), 152.99542 (C3H6PO5-), 171.00615 (C3H8PO6-), 362.20999 (C17H33NPO5-)	438.262	266.24762 (C17H32ON+)	C20H39NPO7-; has phosphate, 153, and 171 peaks in MS/MS ==> GPE; corresponds to GPE glucoside at 598, see above; has corresponding peak in ES+; 8.8 min peak is present in L1 medium but variable, not diff.
		7.7809	861.502				a little shifted from (though still overlaps with) 436 peak, just one C off from 873.50226, which is a dimer of 436; probably an adduct of 436.24716 and 424.24744; 424 may also be diff., hard to say, overlaps with another non-diff. peak; 861 only has phosphate, 153, 171, and 436 in MS/MS; has a corresponding peak in ES+, 863.51645; not in L1 medium
		7.79416	424.247		426.262	254.24762 (C16H32NO+)	2nd peak is not diff.; 849.50201 is a dimer of 424.24738; 849.50201 has 227 and 424 in MS/MS; 424 only has MS/MS for the 2nd peak, but presence of 227.20172 (C14H27O2-) suggests that it may be lyso-PE; 424.24738 has 3 peaks, 2 large and 3rd small; the 1st, broader peak is diff., the 2nd and 3rd aren't; MS/MS of 424 gives phosphate, 153, 171 for the 1st peak (GPE) but phosphate and 227.20166 (C14H…
		7.87732	724.274				C34H47NPO14- ?;has only phosphate peaks in MS/MS, not clear if they're authentic or contamination; has very small corresponding peak in ES+; not in L1 medium
GPE		8.2478	474.263	78.95782 (PO3-), 96.96849 (H2PO4-), 152.99532 (C3H6PO5-), 171.00606 (C3H8PO6-)	476.277	304.26334 (C20H34NO+)	C23H41NPO7-; ~3-4x diff.; has phosphate, 153, and 171 peaks in MS/MS ==> GPE; has corresponding peak in ES+, 476.27735; 2 peaks in ES+, 8.17 and 8.96, both give 304.26334 (C20H34ON+) in MS/MS; present but not diff. in L1 medium
		8.67529	953.564				13C1 of 953.56433, absent in Oct.14 rerun; on Oct.19 there're 2 peaks at 9.9 and 10.2 min, but these are probably not what we need; have MS/MS; not in ES+; 2 peaks, 9.45 and 9.65 min in L1 medium, not diff.
EA		9.75113	372.231		338.269	62.06081 (C2H8NO+), 217.19504 (C16H25+), 259.20547 (C18H27O+), 320.25839 (C20H34NO2+)	C20H35ClNO3-; has Cl; has corresponding peak in ES+ (338.26868); not in L1 medium
EA		9.9643	352.205		318.243	62.06080 (C2H8NO+), 300.23163 (C20H30NO+)	C20H31ClNO2-; has Cl; no good fragments in MS/MS; has corresponding peak in ES+ (318.24258); present in 2 N2 L1 medium samples, variable
EA		10.2496	330.221		296.258	62.06083 (C2H8NO+), 278.24796 (C18H32NO+), 279.23199 (C18H31O2+)	C18H33ClNO2-; has Cl; no good fragments in MS/MS; has corresponding peak in ES+ (296.25842); present in one N2 L1 medium sample
EA		10.6337	354.221		320.258	62.06079 (C2H8NO+), 302.24847 (C20H32NO+)	C20H33ClNO2-; 10.1 and 10.6 min, 10.6 min peak is more strongly diff., has Cl, no good fragments in MS/MS; has corresponding peak in ES+ (320.25833); present in one N2 L1 medium sample
EA		11.1173	382.252		348.29	62.06082 (C2H8NO+), 330.27908 (C22H36NO+), 331.26379 (C22H35O2+, only 1st peak)	C22H37ClNO2-; 11.1 and 11.4 min, has Cl, 8x diff.; no good fragments in MS/MS; has corresponding peak in ES+ (348.28983); not in L1 medium
31
			new: 95 features, 26 are also diff. in L1 medium, 11 of which are in L1 medium table; 12 are present in L1 medium but not diff.; 36 are also in ES+ table; from 95 - 31 ascrs

## Sheet: S4
L1 medium ES+ peaks, low in daf-22								Peaks that are also diff. in growth medium			Peaks that are also in growth medium table		has corresponding peak in ES- table
class	smid-db	rt (min)	m/z (ES+)	MS/MS (ES+)	m/z (ES-)	MS/MS (ES-)	comments	Peaks that are present but not diff. in growth medium
ascr		0.943387	347.254	72.08144 (C4H10N+), 84.08134 (C5H10N+), 101.10774 (C5H13N2+), 217.19107 (C11H25N2O2+)			C17H35N2O5+, MS/MS contaminated by 347.05859; not in ES-; not in growth medium
		0.947803	375.26	70.06583 (C4H8N+), 112.08727 (C5H10N3+), 118.08649 (C5H12NO2+), 210.16002 (C11H20N3O+), 228.17076 (C11H22N3O2+), 358.23364 (C17H32N3O5+)			C17H35N4O5+; not in ES-; not in growth medium
		0.958152	404.312	70.06592 (C4H8N+), 72.08149 (C4H10N+), 84.08131 (C5H10N+), 112.11236 (C7H14N+), 129.13867 (C7H17N2+)			C20H42N3O5+; not in ES-; not in growth medium
ascr		1.11451	373.27	84.08133 (C5H10N+), 127.12309 (C7H15N2+), 355.25900 (C19H35N2O4+)			RT and peak shape are different in one of the samples; C19H37N2O5+; not in ES-; not in growth medium
ascr		1.42163	334.186	see L1s, ES- table			C15H28NO7+, has corresponding peak in ES-; not in growth medium
ascr	bhas#9	1.47086	287.11	see L1s, ES- table			C11H20NaO7+, has corresponding peak in ES-, bhas#9; not in growth medium
		2.41604	220.118				Pantothenic acid; corresponding peak in ES- is ~2x diff.; present, but variable, not diff. in growth medium; proved to be variable and not particularly diff. in tissue-specific rescue experiments
		2.87446	257.1				Na adduct of ascr#11, C10H18NaO6+; also diff. in growth medium
ascr		2.88833	285.131				2 peaks, 2.9 and 3.25 min, C12H22NaO6+, no fragments in MS/MS, ammonium adduct is present but a smaller peak; same formula as Na adduct of ascr#12, which is present and elutes later, at 4.08 min; maybe hydroxy-ascr#2; not in ES-; not in growth medium
		2.88833	308.207	115.07573 (C6H11O2+)			C14H30NO6+; not in ES-; not in growth medium
ascr		3.00075	316.212	55.05509 (C4H7+), 70.06583 (C4H8N+), 99.08086 (C6H11O+), 126.09148 (C7H12NO+), 186.14891 (C10H20NO2+), 200.12817 (C10H18NO3+)			C16H30NO5+; also diff. in growth medium
ascr		3.15878	389.265	84.08133 (C5H10N+), 114.09160 (C6H12NO+), 143.11794 (C7H15N2O+), 241.19069 (C13H25N2O2+), 259.20148 (C13H27N2O3+), 273.18069 (C13H25N2O4+)			C19H37N2O6+; also diff. in growth medium (low)
		3.25475	327.12				ascr#2P, C12H24O8P+; also diff. in growth medium
		3.25475	406.094				?; not in ES-; not in growth medium
ascr		3.25475	447.27	72.08138 (C4H10N+), 86.09697 (C5H12N+), 98.09681 (C6H12N+), 100.07607 (C5H10NO+), 114.09164 (C6H12NO+), 157.13361 (C8H17N2O+), 201.12344 (C9H17N2O3+), 317.20676 (C15H29N2O5+)			C21H39N2O8+; not in growth medium
		3.25475	531.211				C23H36N2O10P+; adduct of ascr#2P and Trp; not in growth medium; p.49
		3.26708	383.229				3.26 and 4.10 min, C18H31N4O5+; no MS/MS info; not in growth medium
ascr		3.27455	369.239	123.09186 (C7H11N2+), 239.17532 (C13H23N2O2+)			C19H33N2O5+; not in growth medium
ascr		3.28965	374.254	84.08135 (C5H10N+), 128.10713 (C7H14NO+)			C19H36NO6+; not in growth medium
ascr		3.33931	388.233	100.07612 (C5H10NO+), 142.08636 (C7H12NO2+), 258.16998 (C13H24NO4+)			C19H34NO7+; not in growth medium
S		3.39433	306.101	see L1s, ES- table			has S, C12H20NSO6+, has correponding peak in ES-; not in growth medium
ascr		3.39433	461.286	114.09165 (C6H12NO+), 138.09137 (C8H12NO+), 155.11789 (C8H15N2O+), 169.13345 (C9H17N2O+), 197.12852 (C10H17N2O2+), 215.13913 (C10H19N2O3+), 231.17030 (C11H23N2O3+), 331.22275 (C16H31N2O5+)			C22H41N2O8+; not in growth medium
ascr		3.49157	330.228	84.08132 (C5H10N+), 200.16452 (C11H22NO2+), 214.14372 (C11H20NO3+)			C17H32NO5+; not in ES-; also diff. in growth medium
		3.53156	305.091				CaOH adduct of ascr#9, C11H21O7Ca+; coicides with ascr#9 in ES- and Na adduct of ascr#9 in ES+; there's a bigger peak at 305.16113 that contaminates MS/MS; not in ES-; not in growth medium
EA		3.5601	216.123	62.06084 (C2H8NO+), 81.07048 (C6H9+), 109.06518 (C7H9O+), 127.07554 (C7H11O2+), 137.05978 (C8H9O2+), 170.11757 (C9H16NO2+), 180.10194 (C10H14NO2+), 198.11259 (C10H16NO3+)	214.108	86.02355 (C3H4NO2-), 170.11836 (C9H16NO2-)	C10H18NO4+; has corresponding peak in ES- (214.10871 and its HCl adduct, 250.08600) at 3.57 min; present but not diff. in growth medium
ascr		3.60189	255.12				C11H20NaO5+, no good MS/MS, ammonium adduct is present but a smaller peak; maybe C5 version of ascr#2 (1 C shortening of ascr#12); not in ES-; also diff. in growth medium
ascr		3.61836	475.302	114.09162 (C6H12NO+), 152.10703 (C9H14NO+), 169.13338 (C9H17N2O+), 213.12335 (C10H17N2O3+), 229.15469 (C11H21N2O3+), 345.23862 (C17H33N2O5+)			C23H43N2O8+; not in growth medium
ascr		3.77612	318.228	72.08147 (C4H10N+), 99.08088 (C6H11O+), 170.15393 (C10H20NO+), 184.13326 (C10H18NO2+), 188.16463 (C10H22NO2+), 202.14383 (C10H20NO3+)			C16H32NO5+; not in growth medium
		3.78021	411.223				ascr#69, C18H35O10+; also diff. in growth medium
ascr	osas#14	3.80039	681.264	see L1s, ES- table			GPE of osas#9, has corresponding peak in ES-; not in growth medium
		3.88291	258.006				?, small peak, has couple other small peaks nearby that would contaminate MS/MS; not in ES-; not in growth medium
		3.8838	245.095				?, overlaps with a much bigger peak at 245.18581, MS/MS is useless; not in ES-; not in growth medium
		3.88529	293.123				3.78 and 3.89 min, C12H21O8+; 2nd peak is NH3 loss from 310.14948 (no corresponding Na adduct); not in ES-; also diff. in growth medium
		3.88931	232.067				?; not in ES-; present but very low in growth medium
		3.88931	310.149				C12H24NO8+, coincides with 2nd 293.12323 peak; there's a peak of similar height at 310.18155, MS/MS would be a mix; not in ES-; present but low in growth medium
		3.89062	440.248				C19H38NO10+, this and the next (454.26434) compounds precisely coelute, which is strange since they differ by CH2. Their MS/MS are identical and have glucose fragments. Likely, these are adducts of ascr#4; not in growth medium
		3.89062	454.264				C20H40NO10+; present in one of growth medium samples
ascr		3.89172	390.248	99.08088 (C6H11O+), 116.10731 (C6H14NO+), 144.10197 (C7H14NO2+)			C19H36NO7+; there're very small corresponding peaks in ES-; not in growth medium
ascr	osas#15	3.92032	569.271	see L1s, ES- table			C27H41N2O11+, has corresponding peak in ES-; not in growth medium
S		3.99003	320.116	84.04494 (C4H6NO+), 102.05531 (C4H8NO2+), 144.06554 (C6H10NO3+)	318.102	66.03363 (C4H4N-), 110.02380 (C5H4NO2-), 142.05031 (C6H8NO3-), 175.04321 (C7H11SO3-)	C13H22NSO6+ ?; has corresponding peak in ES-; not in growth medium
ascr		3.99003	333.122	173.04849 (C6H13CaO3+), 191.05907 (C6H15CaO4+), 203.05910 (C7H15CaO4+), 217.07474 (C8H17CaO4+)			C13H25CaO7+; same formula as ascr#1, but elutes earlier; not in growth medium
		3.9901	271.152				C12H24NaO5+, Na adduct of ascr#6, no fragments in MS/MS, ammonium adduct is very small; ascr#2 elutes at 4.1 min; not in ES-; not in growth medium
ascr		4.0948	331.106	56.96560 (CaOH+), 173.4852 (C6H13CaO3+), 191.05902 (C6H15CaO4+), 201.04338 (C7H13CaO4+), 215.05904 (C8H15CaO4+)			C13H23CaO7+; present in 2 N2 growth medium samples
ascr	osas#16	4.26055	549.243	see L1s, ES- table			C25H38N2O10Na+; Na adduct of osas#9 ethanolamide; has corresponding peak in ES- (HCl adduct, 561.22314); not in growth medium
ascr	osas#17	4.30543	510.198	see 528.20850, 510.19763 in L1s, ES- table			4.30 and 4.68 min, C24H32NO11+, also smaller peaks at 5.11 and 5.75 min with the same fragmentation pattern. Based on MS/MS, this is osas derivative. Fragment of osas glucosides; not in growth medium
ascr		4.31761	663.298				NH3 adduct of osas#9 glucoside, corresponding to Na adduct 668.25317, C29H47N2O15+; has corresponding peak in ES- (644.25732); not in growth medium; p.38
ascr	osas#23	4.4109	565.312	136.07578 (C8H10NO+), 200.16461 (C11H22NO2+), 218.08139 (C12H12NO3+), 236.09175 (C12H14NO4+), 348.14426 (C18H22NO6+)			C29H45N2O9+, osas derivative based on MS/MS; not in ES-; not in growth medium
ascr		4.43366	376.233	see L1s, ES- table			3.43, 3.65, 4.43, 4.65 min, C18H34NO7+; 3.43 and 3.65 min have corresponding ES- peaks, for 3.65 min see ES- table (374.21887); 3.65 min peak is also diff. in growth medium; similar to 388.23294 @ 3.32 min but one carbon fewer and elutes later, maybe it's a fragment, hence several peaks with quite different RTs
ascr	osas#24	4.62641	550.227	276.08438 (C12H15NO5Na+), 388.13629 (C18H23NO7Na+)	526.231	59.01253 (C2H3O2-), 73.02815 (C3H5O3-), 82.02860 (C4H4NO-), 98.02366 (C4H4NO2-), 119.04939 (C8H7O-), 121.02865 (C7H5O2-), 133.0878 (C8H5O2-), 216.06671 (C12H10NO3-), 291.14514 (C13H23O7-, bhas#1)	C25H37NO11Na+; Na adduct of osas based on bhas#1; has corresponding peak in ES-, 526.23083 (there's another peak with this mass at 5.4 min - it's FA adduct of osas#2); not in growth medium
ascr	osas#4	4.6921	661.319	see L1s, ES- table			NH3 adduct of osas#2 glucoside, corresponding to Na adduct at 666.27435, has corresponding peak in ES- (HCl adduct, 678.25476); not in growth medium
ascr		4.78302	303.097	55.05509 (C4H7+), 76.97947 (C2H2OCl+), 83.04971 (C5H7O+), 85.06534 (C5H9O+), 113.06000 (C6H9O2+), 130.08633 (C6H12NO2+), 131.07037 (C6H11O3+), 133.04152 (C6H10OCl+), 148.09677 (C6H14NO3+), 151.05205 (C6H12O2Cl+),			NaCl adduct, C12H21ClNaO5+, no fragments in MS/MS, formula corresponds to ascr#2 with additional double bond, but RT is too late for that; has corresponding NH3 adduct (298.14221); not in growth medium
		4.87718	450.233	see L1s, ES- table			C20H36NO10+, has corresponding peak in ES-; small and strange looking peak, MS/MS has isotope satellites for most fragment peaks, MS/MS is probably contaminated by nearby peaks; not in growth medium
		4.91916	395.181	see L1s, ES- table			C19H27N2O7+, fragment of ascr#1 analog of ascr#8 + glutamic acid; there's a big peak at 393.16611 (see 2 lines below) and its 13C2 isotope dominates MS/MS; not in growth medium; p.40
		4.92791	246.113	see L1s, ES- table			C14H16NO3+, fragment of 393.16550; also diff. in growth medium
ascr	ascr#81	4.92791	393.166	see L1s, ES- table			C19H25N2O7+, fragment of ascr#8 + glutamic acid, has corresponding peak in ES- (521.21423); present in growth medium, diff. but not completely absent in FCS1 (both Aug.30 and Oct.14 runs); different peak? Contamination?
		5.09642	286.016				has Cl, C10H13CaClNO4+ ?, no good peaks in MS/MS; not in growth medium
		5.19528	297.168	55.05507 (C4H7+), 109.10149 (C8H13+), 113.05997 (C6H9O2+), 127.11182 (C8H15O+), 130.08629 (C6H12NO2+), 131.07030 (C6H11O3+), 145.12228 (C8H17O2+), 148.09677 (C6H14NO3+)			Na adduct, C14H26NaO5+, likely C8 analog of ascr#2, no good fragments in MS/MS; has corresponding ammonium adduct (292.21249); not in ES-; not in growth medium
EA		5.28865	258.17	62.06081 (C2H8NO+), 107.08591 (C8H11+), 133.10126 (C10H13+), 151.11179 (C10H15O+), 179.10666 (C11H15O2+), 222.14883 (C13H20NO2+), 240.15942 (C13H22NO3+)			C13H24NO4+; not in ES-; absent or not diff. in growth medium
		5.31033	414.225				double peak, C22H33NNaO5+ ?; no NH3 adduct; not in ES-; not in growth medium; has homolog (442.25711 at 6.21 min)
		5.31218	242.211				fragment of 414.22516, C14H28NO2+; 2 peaks at 5.2-5.3 min that are diff. in FCS1 growth medium; 3 peaks at 6.1, 6.5, and 7.0 min are diff. in N2 growth medium
ascr		5.38063	470.236	104.10743 (C5H14NO+), 184.07335 (C10H11NONa+), 242.09966 (C9H17NO5Na+), 251.12526 (C12H20O4Na+), 340.17209 (C15H27NO6Na+)			C21H37NNaO9+; has very small corresponding peak in ES-; not in growth medium
		5.39757	553.25	137.04582 (C5H5N4O+), 287.14923 (C14H23O6+)	551.236		C25H37N4O10+; has corresponding peak in ES- (551.23599 and its HCl adduct), there're 2 peaks in ES-, 5.0 and 5.4 min; also diff. in growth medium
ascr		5.46486	492.224				C25H34NO9+, there's a bigger peak at 492.32700, which would dominate MS/MS, but see 494.23929 below; not in ES-; not in growth medium
ascr	osas#7	5.4877	532.216	see L1s, ES- table			C25H35NNaO10+; Na adduct of osas#7; has corresponding peak in ES-; not in growth medium
		5.50509	387.133				C16H27O8Ca+; looks like Ca formate adduct of ascr#3; has corresponding FA and HCl adduct peaks in ES-; also diff. in growth medium; p.55
ascr	osas#25	5.55725	494.239	136.07574 (C8H10NO+), 200.07071 (C12H10NO2+), 218.08127 (C12H12NO3+), 236.09171 (C12H14NO4+), 348.14423 (C18H22NO6+)			C25H36NO9+, osas of unsaturated C7 ketone, based on MS/MS; not in ES-; not in growth medium
ascr	osas#1	5.55725	534.232	see L1s, ES- table			C25H37NNaO10+; Na adduct of osas#1; has corresponding peak in ES-; not in growth medium
		5.60756	490.206	see L1s, ES- table			C23H33NO9Na+, Na adduct of tsas#9 and its isomer with OH in the alfa-position; has corresponding peaks in ES-; not in growth medium; p.55
S		5.61808	374.163	see L1s, ES- table			has S, C17H28NSO6+, has corresponding peak in ES-; not in growth medium
ascr	osas#26	5.63546	332.149	101.02374 (C4H5O3+), 103.05470 (C8H7+), 113.06013 (C6H9O2+), 174.09152 (C11H12NO+), 184.07465 (C12H10NO+), 202.08632 (C12H12NO2+), 220.09694 (C12H14NO3+)			5.64 and 6.22 min, C18H22NO5+; not in ES-; absent or present but not diff. in growth medium; looks like the osas fragment (348) but with one O fewer, so maybe corresponding phenylethanolamine derivatives
ascr	nuclas#33, 34	5.73305	697.305	see L1s, ES- table			C30H45N6O13+; has corresponding peak in ES-; also diff. in growth medium
		5.74841	254.212				C15H28NO2+, no fragments in MS/MS; not in ES-; not in growth medium
		5.78574	256.227				C15H30NO2+, fragment of 428.24146; not at this RT, but peaks with this mass at 6.5, 7.1, and 7.5 min are diff. in growth medium
GPE		5.78574	428.241	see L1s, ES- table			C18H39NO8P+; has 256.22733 (C15H30NO2+) in MS/MS; has a corresponding peak in ES- (426.22705); not in growth medium
ascr	osas#22	5.87429	498.19	see L1s, ES- table			has Cl, has osas fragments in MS/MS, C24H33O8NCl+, related to 538.18213 below, has corresponding peak in ES- (514, 550); not in growth medium
		5.87429	538.182				13C1 of 538.18213, has Cl, C24H34O9NClNa+, related to 498.18970 above, has corresponding peak in ES-; not in growth medium
ascr		5.914	528.208	see 528.20850, 510.19763 in L1s, ES- table			4.30, 4.52, 4.69, 4.89, 5.78, and 5.92 min, fragment of osas glucosides, C24H34NO12+; not in growth medium
ascr	osas#20, osas#21	5.9186	702.334	see 528.20850, 510.19763 in L1s, ES- table			only 5.78 and 5.92 min, gives osas fragments in MS/MS, osas#10 glucosides, has corresponding peaks in ES-; not in growth medium
S		6.04378	345.148	see L1s, ES- table			5.95 and 6.04 min, has S, C15H25N2SO5+; has corresponding peak in ES-; also diff. in growth medium, but very low
		6.21026	442.257				C24H37NNaO5+; no NH3 adduct; not in growth medium; has homolog (414.22516 at 5.31 min)
		6.21897	488.226	160.07321 (C8H11NONa+), 167.06798 (C7H12O3Na+), 251.12563 (C12H20O4Na+), 260.08902 (C12H15NO4Na+)			2 peaks, 6.05 and 6.2 min; C24H35NNaO8+; no NH3 adducts; not in ES-; not in growth medium
ascr		6.4109	325.199	55.05507 (C4H7+), 81.07046 (C6H9+), 95.08597 (C7H11+), 113.06001 (C6H9O2+), 130.08638 (C6H12NO2+), 131.07031 (C6H11O3+), 137.13248 (C10H17+), 148.09676 (C6H14NO3+), 155.14301 (C10H19O+), 173.15358 (C10H21O2+)			C16H30NaO5+, no good fragments in MS/MS, looks like a homolog of ascr#2 with C10 side chain; has corresponding NH3 adduct (320.24350); also diff. in growth medium, but very low
GPE		7.85872	634.299	see L1s, ES- table			7.88 and 8.05 min, there's also peak of the same mass at 7.68 min which is present in FCS1 but not in N2; C29H49NPO12+, has corresponding peak in ES-; GPE glucoside; also diff. in growth medium
GPE		8.04285	450.262	see L1s, ES- table			C21H41NPO7+, fragment of GPE glucoside; has corresponding peak in ES-, 610.30066
GPE		8.087	600.315	see L1s, ES- table			C26H51NPO12+, GPE glucoside; variable, 2-10x diff.; has corresponding peak in ES-; also diff. in growth medium
		14.7697	605.335				has Cl, no fragments in MS/MS; not in ES-; not in growth medium
41
			new: 64 features, 14 are also diff. in growth medium, 4 of which are in growth medium table; 22 have corresponding peaks in ES- table; from 64 - 41 ascrs

## Sheet: S5
Growth medium ES+ peaks, low in daf-22								Peaks that are also diff. in L1 medium			Peaks that are also present in L1 medium table			also present in ES- table		manually added entries
class	smid-db	rt (min)	m/z (ES+)	MS/MS (ES+)	m/z (ES-)	MS/MS (ES-)	comments	Peaks that are present but not diff. in L1 medium
		0.961601	268.202				C14H26N3O2+ ?; MS/MS is contaminated by 268.10376; not in ES-; not in L1 medium
ascr	uglas#11	2.87198	669.202	see growth medium, ES- table			has corresponding peak in ES-; not in L1 medium
		2.92485	539.139				-130 from 669.20178; has corresponding peak in ES- (667.18811); not in L1 medium
ascr		3.02481	316.212	see L1, ES+ table			C16H30NO5+
		3.25434	252.123	see L1, ES+ table			4x diff., C13H18O4N+; not in ES-; not in L1 medium; not diff. on Apr.22_2017; p. 103
ascr		3.58483	330.228	see L1, ES+ table			C17H32NO5+
ascr		4.42458	788.24		786.226	78.95783 (PO3-), 92.04945 (C6H6N-), 96.96856 (H2PO4-), 124.01461 (C4H2N3O2-), 136.03973 (C7H6NO2-), 150.03056 (C6H4N3O2-), 167.02078 (C5H3N4O3-), 178.02574 (C7H4N3O3-)	coincides with 621.18109 peak; small peak, MS/MS is likely contaminated; has corresponding peak in ES-, 786.22573; not in L1 medium
ascr		4.44852	621.181	see growth medium, ES- table			has corresponding peak in ES- (749.22992); not in L1 medium
ascr		4.63519	211.037	see growth medium, ES- table			C6H12O6P+; fragment of 383.14688, ascr#3 phosphate; MS/MS would be contaminated by much larger 211.14429; has corresponding peak in ES- (381.13177)
ascr	ascr#82	4.75638	652.272	see growth medium, ES- table			ascr#8-Glu-Glu; has corresponding peak in ES-; not in L1 medium
ascr		4.96372	640.247	see growth medium, ES- table			has corresponding peak in ES-; not in L1 medium
ascr		5.00039	482.26	see growth medium, ES- table			4.75 and 5.00 min; C21H40NO11+; NH3 adducts; the first peak is likely NH3 adduct of glas#3 (up in glo-1), 2nd peak maybe NH3 adduct of ascr#3 glucoside; has corresponding peaks in ES- (1st peak has only HCl adduct, 499.1955, 2nd peak has HCl adduct and molecular ion, 463.21950); 5.0 min peak is also diff. in L1 medium (low)
ascr		5.04971	794.286	see growth medium, ES- table			has adenine, possibly ascr#3-glucose-phopshate-adenine-ribose; has corresponding peak in ES-; not in L1 medium
		5.12915	373.122				MS/MS is contaminated by 373.22345; not in ES-; not in L1 medium
ascr		5.16976	576.184	see growth medium, ES- table			shifted from 668.27864; has corresponding peak in ES-; not in L1 medium
ascr	nuclas#35, 36	5.25113	668.278	see growth medium, ES- table			5.25 and 5.65 min; has corresponding peak in ES-; 5.6 min peak is also diff in L1 medium (e4)
		5.45806	941.355	136.06175 (C5H6N5+), 292.11786 (C15H18NO5+), 422.20306 (C19H28N5O6+), 427.17346, 525.14929	939.341	78.95783 (PO3-), 96.96856 (H2PO4-)	5.0 and 5.5 min; contains adenine; has corresponding peak in ES-; not in L1 medium
ascr		5.48453	488.169	see growth medium, ES- table			5.5 and 5.8 min; MS/MS of the earlier peak would be contaminated by 488.22992; -130 of 618.23224, has corresponding peak in ES-; not in L1 medium; p. 88,100
		5.5098	309.167		285.171	57.03328 (C3H5O-), 73.02824 (C3H5O2-), 87.04402 (C4H7O2-), 101.05977 (C5H9O2-), 115.07568 (C6H11O2-), 125.09643 (C8H13O-), 169.12325 (C10H17O2-), 241.18098 (C14H25O3-)	C15H26O5Na+; poor fragmentation in MS/MS; loses H2O, other ions seem irrelevant; has corresponding peak in ES-, 285.17096; not in L1 medium
		5.53751	387.133				has Ca; also in N2 L1 medium; MS/MS matches C16H27O8Ca fragments (p.55); looks like Ca formate adduct of ascr#3
ascr		5.65828	569.272	109.06510 (C7H9O+), 127.07547 (C7H11O2+), 134.06007 (C8H8NO+), 213.12360 (C10H17N2O3+), 264.12317 (C14H18NO4+), 289.12857 (C13H31O7+)			C27H41N2O11+; ascr#7-glucose-something?; not in ES-; not in L1 medium
EA		5.67862	232.191	62.06082 (C2H8NO+), 214.18016 (C12H24NO2+)	266.153		5.7 and 6.1 min, C12H26NO3+; has corresponding HCl (266.15311) and FA adducts (276.18188) in ES- (3rd peak at 6.5 min is not diff.); MS/MS of 276.18188 (-) gave only 230 (molecular ion); not in L1 medium
ascr	anglas#7	5.71471	556.24	see growth medium, ES- table			C26H38NO12+; ascr#7-glucose-anthranilic acid (or PABA); has corresponding HCl adduct in ES-, 590.20203; 554.22543(-) is unrelated, it's FA adduct of ascr#9-glucose-indole; not in L1 medium
		5.73803	486.153	see growth medium, ES- table			-130 from 616.21661; not in L1 medium
ascr	iglas#71	5.73803	616.217	see growth medium, ES- table			ascr#7-glucose-phosphate-indole; coincides with 486.15332 peak (-130); has corresponding peak in ES-; not in L1 medium
EA		5.76457	238.18	62.06084 (C2H8NO+), 177.12737 (C12H17O+)			C14H24NO2+, shifted from 616.21658; ethanolamide of C12 fatty acid with 3 double bonds; not in ES-; not in L1 medium
ascr	iglas#9	5.78	527.261				C25H39N2O10+; NH3 adduct of ascr#9-glucose-indole
ascr	anglas#1	5.7946	558.256	see growth medium, ES- table			ascr#1-glucose-anthranilic acid (or PABA); has HCl adduct in ES-, 592.21759; not in L1 medium
ascr	iglas#11	5.81479	618.232	see growth medium, ES- table			5.45 and 5.85 min; has -130 fragment, 488.16867; has corresponding peak in ES-; not in L1 medium
		6.00604	541.277	115.07555 (C6H11O2+), 118.06532 (C8H8N+), 130.06516 (C9H8N+), 230.11736 (C14H16NO2+)			C26H41N2O10+; not in ES-; not in L1 medium
ascr	nuclas#31, 32	6.11357	580.299	164.09306 (C7H10N5+), 450.23474 (C21H32N5O6+)			ascr#3-ribose-dimethyladenine; not in ES-; not in L1 medium
ascr	iglas#7	6.20165	536.25	see growth medium, ES- table			has corresponding peak in ES- (HCl adduct, 570.21198); ascr#7-glucose-indole; not in L1 medium
EA		6.2135	246.206	62.06082 (C2H8NO+), 228.19574 (C13H26NO2+)	280.169		C13H28NO3+; MS/MS maybe contaminated by a neighboring peaks; ethanolamide of C11 fatty acid, loses H2O; has corresponding HCl (280.16852) and FA (290.19772) adducts in ES- (later peaks at 7 min aren't diff.); MS/MS on 290.19772(-) didn't give any fragments; not in L1 medium
ascr		6.32447	644.247	see growth medium, ES- table			has corresponding peak in ES-; ascr#3-glucose-phosphate-indole; not in L1 medium
		6.3331	555.292	see growth medium, ES- table			ammonium adduct corresponding to 538.26520; not in L1 medium; p. 101
ascr	iglas#1	6.33327	538.265	see growth medium, ES- table			ascr#1-glucose-indole; has corresponding peak in ES- (HCl adduct, 572.22729); not in L1 medium
		6.35738	713.303	see growth medium, ES- table			adduct of 295.16486 (not diff.) and 419.14505 (diff. see below); has corresponding peak in ES- (although it's somewhat present in one of FCS1 samples); tried MS/MS on 711.28897 in ES- on 12/25/2016, but the peak is too low, no MS/MS; not in L1 medium; p. 103
		6.36862	419.145	see growth medium, ES- table			6x diff.; has corresponding peak in ES- (453.10767); not in L1 medium
ascr	anglas#3	6.38527	584.271	95.04955 (C6H7O+), 109.10147 (C8H13+), 113.05993 (C6H9O2+), 120.04453 (C7H6NO+), 127.03904 (C6H7O3+), 138.05490 (C7H8NO2+), 155.10651 (C9H15O2+), 173.11714 (C9H17O3+), 228.06528 (C13H10NO3+), 250.10718 (C13H16NO4+), 263.12766 (C15H19O4+), 268.11780 (C13H18NO5+), 281.13806 (C15H21O5+), 299.14890 (C15H23O6+), 317.15912 (C15H25O7+), 400.17484 (C22H26NO6+), 418.18643 (C22H28NO7+), 436.19629 (C22H30NO…	618.233		ascr#3-glucose-anthranilic acid; up in glo-1; has corresponding peak in ES-; not in L1 medium
		6.59952	306.204				C16H29O3NNa+; Na adduct of 284.22211; no fragmentation in MS/MS; not in L1 medium
EA		6.66562	284.222	62.06081 (C2H8NO+), 266.21130 (C16H28NO2+)	318.1845, 328.21347	210.14990 (C12H20NO2-)	C16H30NO3+; has corresponding HCl (318.1845) and FA (328.21347) adducts in ES-; not in L1 medium
		6.66722	266.212				-H2O from 284.22232, 6.67 min and smaller diff. peaks at 7.15, 7.35, and 7.55 min; MS/MS is similar to 284.22232; not in L1 medium
GPE		6.70063	572.284	see growth medium, ES- table			5x diff.; GPE glucoside of C13 fatty acid; has corresponding peak in ES-; in L1 medium, peak at 7.05 min is <2x diff.
		6.74276	537.389				coincides with 258.20633 peak; Na adduct of 258.20633 dimer; not in L1 medium
EA		6.74647	352.248	62.06080 (C2H8NO+), 316.22699 (C20H30NO2+), 334.23685 (C20H32NO3+)	396.239	262.18118 (C16H24NO2-)	C20H34NO4+; coincides with 258.20633 peak; produces 62.06080 ion and hydrocarbon fragments up to C18; loses two H2Os; so it's probably unrelated to 258.20633; ethanolamide of C18 fatty acid with 4 double bonds and 2 OH groups; has corresponding HCl (386.21041) and FA (396.23938) adducts in ES-, MS/MS of 396.23938 in ES- gave only 262.18118 (C16H24NO2-); not in L1 medium
		6.76108	250.217				double peak, C16H28ON+, fragment of 584.28400, peaks coincide; MS/MS is contaminated by 250.11194; not in L1 medium
GPE		6.77919	584.284	see growth medium, ES- table			double peak; has corresponding peak in ES-; GPE glucoside of C14 fatty acid with 2 double bonds; 3x diff. in L1 medium (7.15 min)
		6.80898	704.341	127.03909 (C6H7O3+), 136.07561 (C8H10NO+), 141.09120 (C8H13O2+), 159.10146 (C8H15O3+), 285.13284 (C14H21O6+), 295.19016 (C17H27O4+)	702.326		C33H55NPO13+ (?), has corresponding peak in ES- (~3x diff.); present, but not diff. in L1 medium
EA		6.80907	274.238	62.06080 (C2H8NO+), 256.22687 (C15H30NO2+)	308.20000, 318.22888		6.8, 7.1, and 7.55 min; C15H32NO3+; MS/MS at 7.5 min would be contaminated; all peaks are ethanolamides of saturated C13 fatty acid with OH group; has corresponding HCl (308.20000) and FA (318.22888) adducts in ES- (6.5, 6.8, 7.1, 7.5 min, later peak at 8.5 min is not diff.); tried MS/MS of 318.22888 (-), but didn't get good fragments for any of the peaks; not in L1 medium
EA		6.81763	258.207	see growth medium, ES- table			6.2 and 6.8 min; C14H28NO3+; have corresponding peaks in ES-, HCl (292.16869) and FA (302.19775) adducts; ethanolamide of C12 fatty acid with one double bond and OH group; 6.8 min peak is present, but not diff. in L1 medium, however, -H2O fragment is not in L1 medium, so maybe it's a different peak; 6.2 min peak is not in L1 medium
		6.82442	240.196				-H2O fragment from 258.20651; not in L1 medium
ascr	iglas#3	6.82	581.307				C29H45N2O10+; NH3 adduct of ascr#3-glucose-indole
EA		6.82577	272.222	62.06082 (C2H8NO+), 254.21123 (C15H28NO2+)			C15H30NO3+; ethanolamide; -H2O fragment; there's a bigger peak with this mass (and similar fragmentation) at 6.2 min; not in L1 medium
		6.82665	521.327				coincides with 272.22192 peak, different from 584.28355 peak; in MS/MS only produces fragments of 250.11185; overlaps, but not perfectly coincides with 250.11185; looks like adduct of 272.22192 + 250.11185 - 1.00725; not in ES-; not in L1 medium
ascr		6.87468	581.308	see growth medium, ES- table			ammonium adduct of 564.28131; slightly shifted from 274.21667; ascr#3-glucose-indole; has corresponding peak in ES-, 598.24384; not in L1 medium
GPE		6.87468	608.283	see growth medium, ES- table			related to 572.28406; GPE glucoside; has corresponding peak in ES-; in L1 medium, peak at 7.25 min is present in only one N2 sample, but two fragments and Na adduct are present and diff.; in L1 medium 572 and 608 don't coincide
		6.87703	564.281				ascr#3-glucose-indole; has corresponding peak in ES- (HCl adduct); not in L1 medium; p. 91
		6.88331	274.217				peak coincides with 608.28345, likely a fragment; C18H28ON+; peak at 7.25 min is 3x diff. in L1 medium
		6.90502	446.231				-162 from 608.28345, peaks coincide, fragment (loss of glucose); also diff. in L1 medium
		6.93537	446.231				13C1 of 446.23074, see 6.91 min; coincides with 630.26587
		6.93537	630.266				Na adduct of 608.28345; also diff. in L1 medium
		6.96814	408.202	106.02904 (C6H4NO+), 113.05995 (C6H9O2+), 124.03940 (C6H6NO2+), 178.08611 (C10H12NO2+), 236.09152 (C12H14NO4+), 254.10194 (C12H16NO5+)	406.187		C21H30NO7+; 4x diff.; has corresponding peak in ES-, 406.18722, which is perfectly diff.; tried MS/MS on it but it would be contaminated by 406.15112; also diff. in L1 medium
EA		7.02671	260.222	see growth medium, ES- table			10x diff., C14H30NO3+; has corresponding peak in ES- (HCl adduct); ethanolamide of saturated C12 fatty acid with one OH group; not in L1 medium
EA		7.06408	324.217	62.06083 (C2H8NO+), 288.19537 (C18H26NO2+), 306.20636 (C18H28NO3+)	358.179		C18H30NO4+; ethanolamide, loses two H2Os; hydrocarbon ions up to C16; has small corresponding HCl adduct (358.17913), but no FA adduct in ES-; also diff. in L1 medium
EA		7.07151	398.231				4x diff.; ea#12; C17H37O7NP+; has corresponding peak in ES-, but it's 2x diff and quite variable; peak at 7.6 min is present in L1 medium, but not diff.
EA		7.07151	598.299	see growth medium, ES- table			GPE glucoside of C15 fatty acid with 2 double bonds; C26H49NPO12+; 98.06040 (C5H8NO+) and 264.23203 (C17H30NO+) in MS/MS; has corresponding peak in ES-; also diff. in L1 medium
ascr	puglas#7	7.07997	668.296	134.04620 (C5H4N5+), 165.02325 (C6H5N4S+), 182.04944 (C6H8N5S+), 194.04953 (C7H8N5S+), 250.11186 (C11H16N5S+), 538.23254 (C24H36N5SO7+)			C30H46N5SO10+; ascr#7-glucose-ms2i6A; not in ES-; not in L1 medium
ascr	puglas#1	7.16439	670.312	134.04613 (C5H4N5+), 152.05659 (C5H6N5O+), 165.02287 (C6H5N4S+), 182.04953 (C6H8N5S+), 194.04953 (C7H8N5S+), 224.05968 (C8H10N5SO+), 250.11194 (C11H16N5S+), 380.17499 (C17H26N5SO3+), 472.18652 (C19H30N5SO7+), 540.24896 (C24H38N5SO7+)			C30H48N5SO10+; saturated analog of 668.29645; not in ES-; not in L1 medium
GPE		7.20596	620.284	see growth medium, ES- table			main fragment 286.21637; C19H28NO+; has corresponding peak in ES-; GPE glucoside of C17 fatty acid; not in L1 medium
GPE		7.2902	634.299	see growth medium, ES- table			10x diff.; has corresponding peak in ES-; C29H49NPO12+; GPE glucoside of C18 fatty acid with 5 double bonds, main fragment 300.23199, C20H30ON+; also diff. in L1 medium
		7.30141	736.415	see growth medium, ES- table			coincides with 634.29919, has 300.23206 as a main ion in MS/MS --> probably adduct of 634.29919; not in ES-; not in L1 medium
		7.31354	656.281	see growth medium, ES- table			13C1 of 656.28094, 10x diff.; Na adduct of 634.29919; has MS/MS fragments similar to 630.26587 (Na adduct of 608.28345); also diff. in L1 medium
EA		7.32593	310.238	see growth medium, ES- table			C18H32NO3+; 2 peaks, 7.2 and 7.32 min; ethanolamide; loses H2O; hydrocarbon ions up to C16; has corresponding peak in ES- (HCl adduct 344.19998, FA adduct 354.22894); tried MS/MS on 354.22894 in ES-, but don't see anything above background for either of the peaks; not in L1 medium; L1 medium has FCS1 diff. peak with this mass at 7.15 min
EA		7.38559	292.227	62.06083 (C2H8NO+)			7.3 and 9.3 min, C18H30O2N+; very similar spectra for both peaks; ethanolamide; hydrocarbon ions up to C16; first peak (7.3 min) coincides with second 310.23758 peak, it's likely -H2O fragment; only 2nd peak (9.3 min) has corresponding HCl adduct in ES- (FA adduct is small); 9.3 min - 2 N2 L1 medium samples have the peak; also FCS1 diff. for 7.15 min (see 310.23758)
EA		7.40743	268.227	62.06083 (C2H8NO+)			C16H30NO2+; ethanolamide, 62.06083 and hydrocarbon ions up to C14 in MS/MS; not in ES-; not in L1 medium
GPE		7.44935	438.262	see growth medium, ES- table			7.45 and 7.75 min; has corresponding peak in ES-; main MS/MS fragment is 266.24762, C17H32NO+; first peak coincides with 600.31464 (+162), and is therefore a fragment of GPE glucoside; second peak is GPE molecular ion; peak at 8.1 min is diff. in L1 medium, peak at 8.8 min is not
GPE		7.45457	600.315	see growth medium, ES- table			10x diff.; GPE glucoside; has corresponding peak in ES-; main MS/MS fragment is 266.24762, C17H32NO+; also diff. in L1 medium
		7.45774	702.43	see growth medium, ES- table			coincides with 600.31464; has 266.24762 as the main fragment --> adduct of 600.31464; not in L1 medium
	puglas#3	7.6	696.328				C32H50N5SO10+; ascr#3-glucose-ms2i6A
GPE		7.89533	612.315	see growth medium, ES- table			main fragment 278.24765, C18H32NO+; has corresponding peak in ES-; GPE glucoside of C16 fatty acid; also diff. in L1 medium
		7.95931	600.315				main fragment 266.24759, C17H32ON+; has corresponding peak in ES-; GPE glucoside of C15 fatty acid
EA		8.2566	336.253	62.06081 (C2H8NO+)	370.21514, 380.24457		C20H34NO3+; ethanolamide; hydrocarbon fragments up to C18; has corresponding HCl (370.21514) and FA (380.24457) adducts in ES-; tried MS/MS of 380.24457 in ES- but don't see any fragments above background; peak at 8.35 min is FCS1 diff. in L1 medium
		8.26136	266.248				7.6, 8.0, 10.5 min, C17H32NO+; no MS/MS of the first peak; second peak doesn't fragment efficiently; third peak (10.5 min) is -H2O fragment of 284.25833 (coincide); 8.1 min peak is also diff. in L1 medium, the other two peaks are not in L1 medium
EA		9.20636	256.227	62.06081 (C2H8NO+), 238.21642 (C15H28NO+), 239.20039 (C15H27O2+)	290.189		C15H30NO2+; ethanolamide of C13 fatty acid; hydrocarbon ions up to C13; maybe O-ethanolamide, has -H2O and -NH3 fragments; has corresponding HCl adduct in ES- (290.18914), FA adduct is small; present, but variable, not diff. in L1 medium
EA		9.25779	244.227	62.06081 (C2H8NO+), 226.21649 (C14H28NO+), 227.20047 (C14H27O2+)	278.189		C14H30NO2+; 10x diff., has Na adduct, so this is a molecular ion; ethanolamide; hydrocarbon ions up to C12; loses NH3 --> O-ethanolamide; has corresponding HCl adduct (278.18926) in ES-, FA adduct is small; present but not diff. in L1 medium
		9.35174	443.348	112.07600 (C6H10NO+), 130.08635 (C6H12NO2+), 140.07057 (C7H10NO2+), 158.08115 (C7H12NO3+), 250.25275 (C17H32N+), 346.27353 (C22H36NO2+), 425.33777 (C24H45N2O4+)	477.31		MS/MS may be contaminated by 443.28729; has corresponding peak in ES- (HCl adduct, 477.30993), molecular ion and FA adducts are small or not there; tried MS/MS of 477.30993 in ES- but see mostly unrelated peaks (phosphate, >N2); not in L1 medium
EA		9.63937	282.243	62.06081 (C2H8NO+), 264.23169 (C17H30NO+), 265.21585 (C17H29O2+)	316.205		C17H32NO2+; ethanolamide; hydrocarbon ions up to C15; has small HCl adduct peak in ES- (316.20486), no FA adduct; not in L1 medium
EA		9.64975	314.269	62.06082 (C2H8NO+), 296.25833 (C18H34NO2+)	348.23098, 358.26010	100.03935 (C4H6NO2-), 102.05502 (C4H8NO2-)	C18H36NO3+; 4x diff., there's a peak with the same mass at 10.9 min, which is high in FCS1 and low in N2; ethanolamide; H2O loss and hydrocarbon ions up to C16; has corresponding HCl (348.23098) and FA (358.26010) adducts in ES-; MS/MS of 358.26010 in ES- gives 100.03935 (C4H6NO2-) and 102.05502 (C4H8NO2-); present but not clearly diff. in L1 medium
EA		9.73251	338.269	see growth medium, ES- table			C20H36NO3+; has corrsponding peak in ES- (HCl adduct, 372.23126); ethanolamide; H2O loss; hydrocarbon ions up to C18; there's a peak at 10.0 min, which is present but not diff. in L1 medium
EA		9.76941	270.243	62.06081 (C2H8NO+), 252.23170 (C16H30NO+), 253.21591 (C16H29O2+)	304.205		C16H32NO2+; ethanolamide; hydrocarbon ions up to C14; probably O-ethanolamide, loses both H2O and NH3; has corresponding HCl adduct (304.20473, 9.75 and 9.9 min) in ES-, FA adduct is small; present but not diff. in L1 medium
		9.77703	527.478				C31H63O4N2+; noncovalent adduct of two ethanolamides, 258.24274 and 270.24255; not in L1 medium
EA		9.86194	258.243	62.06079 (C2H8NO+), 240.23184 (C15H30NO+), 241.21596 (C15H29O2+)	292.20492, 302.23392		C15H32NO2+; ethanolamide; loss of NH3 --> O-ethanolamide; has corresponding HCl (292.20492) and small FA (302.23392) adducts in ES-; tried MS/MS of 302.23392 in ES-, but don't see any fragments above background; present but not diff. in L1 medium
EA		9.89564	294.243	62.06081 (C2H8NO+), 276.23203 (C18H30NO+), 277.21661 (C18H29O2+)	328.20483, 338.23401		C18H32NO2+; ethanolamide; hydrocarbon ions up to C16; has corresponding HCl (328.20483) and small FA (338.23401) adducts in ES-; tried MS/MS on 338.23401 but don't see any fragments above background; not in L1 medium
EA		9.92173	318.243	see growth medium, ES- table			C20H32NO2+; ethanolamide of C18 acid, has 62 peak in MS/MS and hydrocarbon fragments up to C18; has corresponding peak in ES- (HCl adduct, 352.20535); present only in 2 N2 L1 medium samples
		10.0655	586.424	98.98460 (H4PO4+), 140.01082 (C2H7NPO4+), 155.04677 (C4H12PO4+), 211.10945 (C8H20PO4+), 267.17200 (C12H28PO4+), 320.25824 (C20H34NO2+)			C32H61NPO6+; not in ES-; not in L1 medium
EA		10.1127	320.258	see growth medium, ES- table			10.1 and 10.6 min, C20H34NO2+; ethanolamide of C18 acid, has 62 peak in MS/MS and hydrocarbon fragments up to C18; MS/MS for both peaks is very similar; has corresponding peak in ES- (HCl adduct, 354.22104); present only in 2 N2 L1 medium samples (1st peak is bigger)
EA		10.1842	308.258	62.06081 (C2H8NO+), 290.24777 (C19H32NO+), 291.23239 (C19H31O2+)	342.22		C19H34NO2+; ethanolamide; hydrocarbon ions up to C17; has corresponding HCl (342.22045) and small FA adducts in ES-; not in L1 medium
EA		10.2028	296.258	see growth medium, ES- table			C18H34NO2+; ethanolamide of C16 acid, has 62 peak in MS/MS and hydrocarbon fragments up to C16; loses H2O and NH3 ==> O-ethanolamide (which may lose NH3) isomerizes to N-ethanolamide (5-membered ring), which may lose H2O; has corresponding peak in ES- (HCl adduct, 330.22098); present but variable, not diff. in L1 medium
EA		10.382	284.258	62.06083 (C2H8NO+), 266.24774 (C17H32NO+), 267.23151 (C17H31O2+)	318.22057, 328.24960		C17H34NO2+; ethanolamide of C15 acid, has 62 peak in MS/MS and hydrocarbon fragments up to C15; loses H2O and NH3 ==> O-ethanolamide (which may lose NH3) isomerizes to N-ethanolamide (5-membered ring), which may lose H2O; has corresponding HCl (318.22057) and smaller FA (328.24960) adducts in ES-; tried MS/MS on 328.24960, but don't see any fragments above background; present but variable in L1 m…
EA		10.6116	272.258	62.06081 (C2H8NO+), 254.24777 (C16H32NO+), 255.23174 (C16H31O2+)	306.22063, 316.24966		C16H34NO2+; 5x diff., ethanolamide; has 62 peak in MS/MS and hydrocarbon fragments up to C14; loses H2O and NH3 ==> O-ethanolamide (which may lose NH3) isomerizes to N-ethanolamide (5-membered ring), which may lose H2O; has corresponding HCl (306.22063) and smaller FA (316.24966) adducts in ES-; tried MS/MS on 316.24966 in ES-, but don't see any fragments above background; present but not diff. i…
EA		10.6722	346.274	62.06081 (C2H8NO+), 328.26282 (C22H34NO+)	380.23623, 390.26520		C22H36NO2+; EPEA, ethanolamide of C20 fatty acid, hydrocarbon ions up to C20; no loss of NH3; has corresponding HCl (380.23623) and FA (390.26520) adducts in ES-; tried MS/MS on 390.26520 in ES-, but don't see any reasonable fragments above background; present but variable, not diff. in L1 medium
EA		10.8024	322.274	62.06079 (C2H8NO+), 304.26352 (C20H34NO+)	356.23638, 366.26501		C20H36NO2+; ethanolamide of C18 fatty acid; hydrocarbon ions up to C18; no loss of NH3; has corresponding HCl (356.23638) and FA (366.26501) adducts in ES-; tried MS/MS on 366.26501 in ES- but don't see any fragments above background; present but variable, not diff. in L1 medium
EA		10.9681	298.274	62.06082 (C2H8NO+), 280.26331 (C18H34NO+), 281.24756 (C18H33O2+)	332.23617, 342.26517		C18H36NO2+; ethanolamide; hydrocarbon ions up to C16; loses both H2O and NH3; has corresponding HCl (332.23617) and smaller FA (342.26517) adducts in ES-; tried MS/MS on 342.26517 in ES- (2 peaks 0.15 min apart), but don't see any fragments above background; present but variable, not diff. in L1 medium
EA		11.0813	348.29	see growth medium, ES- table			11.1 and 11.35 min, 8x diff., C22H38NO2+; ethanolamide of C20 acid, has 62 peak in MS/MS and hydrocarbon fragments up to C20 for both peaks; first peak loses both H2O and NH3, second peak loses only H2O; has corresponding peaks in ES- (HCl adduct, 382.25238, and smaller FA adduct, 392.28116); tried MS/MS on 392.28116 in MS/MS but don't see any fragments above background; present but variable, not…
EA		11.7452	350.305	62.06083 (C2H8NO+), *332.29437 (C22H38NO+), *333.27859 (C22H37O2+); *only in the 2nd peak	384.2676, 394.29666		C22H40NO2+; ethanolamide; second (bigger) peak loses both H2O and NH3; has corresponding HCl (384.2676) and FA (394.29666) adducts in ES-; tried MS/MS on 394.29666 in ES- but don't see any fragments above background; present (low, variable), but not diff. in L1 medium
EA		12.1483	326.305	62.06079 (C2H8NO+), 308.29468 (C20H38NO+), 309.27850 (C20H37O2+)	360.268		C20H40NO2+; ethanolamide; loses both H2O and NH3; has corresponding HCl adduct (360.26766) in ES-; present (low, variable), but not diff. in L1 medium
28
			new: 82 features, 13 are also diff. in L1 medium, 4 of which are also in L1 medium table; 19 are present in L1 medium but not diff., 34 have corresponding peaks in ES- table; from 83 - 28 ascrs

## Sheet: known ascrs
short-chain		unpublished ascrs					long-chain ascrarosides
# of carbons	smid-db ID	RT(min) on H2O/MeCN gradient	m/z calc (ES-)				# of carbons	smid-db ID	RT(min) on MeCN/i-PrOH gradient	m/z calc (ES-)
3	ascr#5	1.64	219.087				9	ascr#10		303.181
4	ascr#11	2.89	233.103				10	ascr#16		317.197
5	ascr#9	3.59	247.119				11	ascr#18		331.213
5	oscr#9	3.68	247.119				12	ascr#20		345.228
6	ascr#12	4.15	261.134				13	ascr#22		359.244
7	ascr#7	4.49	273.134				14	ascr#24		373.26
7	ascr#1	4.68	275.15				15	ascr#26		387.275
8	ascr#14	5.22	289.166				16	ascr#28	0.94	401.291
9	ascr#3	5.56	301.166				17	ascr#30	1	415.307
9	ascr#10	5.76	303.181				18	ascr#32	1.07	429.322
10	ascr#16	6.29	317.197				19	ascr#34	1.16	443.338
11	ascr#18	6.82	331.213				20	ascr#36	1.28	457.353
12	ascr#20	7.35	345.228				21	ascr#38	1.41	471.369
13	ascr#22	7.88	359.244				22	ascr#40	1.58	485.385
5	icas#9	6.56	390.156				23	ascr#42	1.79	499.4
9	icas#3	7.89	444.203				24	ascr#44	1.99	513.416
9	icas#10	8.07	446.218				25	ascr#46	2.37	527.432
5	osas#9	4.91	482.203				26	ascr#48	2.65	541.447
5	tsas#9	5.52	466.208				27	ascr#50	3.2	555.463
9	osas#10	6.48	538.266				28	ascr#52	3.6	569.479
6	ascr#4(+FA)	3.93	453.198				29	ascr#54	4.23	583.494
6	ascr#69(+FA)	3.8	455.213				30	ascr#56	4.78	597.51
6	osas#2	5.39	480.224				31	ascr#58	5.33	611.526
6	osas#12	5.22	496.219				32	ascr#60	5.88	625.541
7	osas#1	5.6	510.234				33	ascr#62	6.4	639.557
7	osas#7	5.53	508.219				34	ascr#64	6.9	653.573
9	osas#3	6.37	536.25				35	ascr#66	?	667.588
6	icas#12	6.86	404.171				36	ascr#68	7.84	681.604
7	icas#7	7.12	416.171
7	icas#1	7.23	418.187
5	hbas#9	5.89	367.14				long-chain metylketones
							n=		RT(min) on MeCN/i-PrOH gradient	m/z calc (ES+, Na adducts)
							18		1.63	493.386
new ascarosides							19		1.86	507.402
	ascr#2P	3.28	325.106				20		2.13	521.418
	ascr#4P	3.14	487.159				21		2.49	535.433
	ascr#69P	3.03	489.174				22		2.89	549.449
	ascr#6P	3.17	327.121				23		3.33	563.465
	bkas#1	3.78	289.129				24		3.82	577.48
	bkas#1 fragment	3.78	245.139				25		4.32	591.496
							26		4.84	605.512
							27		5.33	619.527
	ascr#2		269.136				28		?	633.543
	ascr#6		271.152				29		6.31	647.558

## Sheet: S6
L1 medium ES- peaks, high in daf-22							Peaks that are also diff. in growth medium			Peaks that are also in growth medium table				has corresponding peak in ES+			known long-chain ascrs are hidden
class	smid-db	rt (min)	m/z (ES-)	MS/MS (ES-)	m/z (ES+)	MS/MS (ES+)	comments
GPE		1.12621	486.035	78.95782 (PO3-), 96.96855 (H2PO4-), 152.99547 (C3H6PO5-), 333.05939 (C9H18PO11-)	488.049	153.98210 (C4H6NOCl2+)	has 2 Cl; has phosphate based on MS/MS; C13H23Cl2NO12P-, glucoside of GPE with m/z 323.98166 @ 1.17 min, has coresponding peak in ES+; also diff. in growth medium
GPE		1.17644	323.982	78.95779 (PO3-), 96.96844 (H2PO4-), 152.99535 (C3H6PO5-), 171.00615 (C3H8PO6-)	325.996	82.94549 (CHCl2+), 153.98201 (C4H6NOCl2+)	C7H13Cl2NPO7-, has phosphate based on MS/MS, has corresponding glucoside (m/z 486.03470 above); chlorines seem to be covalently attached, otherwise impossible to draw the structure; has corresponding peak in ES+
		4.4	245.103				C11H17O6-; accidentally found, not from XCMS
		4.91927	391.198	59.01260 (C2H3O2-), 71.01263 (C3H3O2-), 73.02826 (C3H5O2-), 83.01274 (C4H3O2-), 85.02834 (C4H5O2-), 101.02338 (C4H5O3-), 113.02346 (C5H5O3-)	410.23889, 415.19431		C18H31O9-, has glucose based on MS/MS, may need MS/MS at >60, looks lke a glucoside of saturated C12 diacid; no HCl adduct; has NH3 and Na adducts in ES+ (410.23889, 415.19431)
GPE		5.06645	498.248	78.95783 (PO3-), 140.01138 (C2H7NPO4-), 152.99551 (C3H6PO5-), 171.00623 (C3H8PO6-), 214.04877 (C5H13NPO6-)			C21H41NO10P-, has phosphate based on MS/MS, has strong 140/214 peaks in MS/MS; additonal peak wth the same mass and fragmentaton pattern later (5.38 min); has small corresponding peak in ES+, 5.07 min
GPE		5.29177	382.164	78.95782 (PO3-), 140.01129 (C2H7NPO4-), 152.99548 (C3H6PO5-), 171.00624 (C3H8PO6-), 214.04874 (C5H13NPO6-)	384.179		C15H29NPO8-, has phosphate based on MS/MS, has strong 140/214 peks in MS/MS; has corresponding peak in ES+, 384.17881; also diff. in growth medium
GPE		5.39049	512.227	first two peaks: 78.95784 (PO3-), 140.01129 (C2H7NPO4-), 152.99556 (C3H6PO5-), 171.00635 (C3H8PO6-), 214.04875 (C5H13NPO6-); 3rd peak: 78.95783 (PO3-), 96.96858 (H2PO4-), 152.99564 (C3H6PO5-), 350.17380 (C15H29NPO6-)			4.97, 5.37, and 6.51 min; C21H39NPO11-, has phosphate based on MS/MS; 5.35 min peak MS/MS may be contaminated by 512.26361; first two peaks have very similar fragmentation patterns with strong 140/214 peaks; third peak is a glucoside, but one O short of GPE glucoside; maybe no carbonyl, just amine? 4.97 min has small corresponding peak in ES+
GPE		5.60571	538.243	78.95785 (PO3-), 140.01137 (C2H7NPO4-), 152.99565 (C3H6PO5-), 171.00627 (C3H8PO6-), 214.04880 (C5H13NPO6-)	540.258		C23H41NPO11-, has phosphate based on MS/MS, has strong 140/214 peaks in MS/MS; has corresponding peak in ES+, 540.2576
GPE		5.67023	524.264	78.95784 (PO3-), 140.01129 (C2H7NPO4-), 152.99547 (C3H6PO5-), 171.00612 (C3H8PO6-), 214.04872 (C5H13NPO6-)	526.278		5.54 and 5.64 min; C23H43NPO10-, has phosphate based on MS/MS, has strong 140/214 peaks in MS/MS; has corresponding peaks in ES+, 526.27805
GPE		5.67884	512.263	78.95783 (PO3-), 140.01129 (C2H7NPO4-), 152.99551 (C3H6PO5-), 171.00626 (C3H8PO6-), 214.04872 (C5H13NPO6-)	514.278		5.39, 5.65, and 5.85 min; C22H43NPO10-; 5.39min peak has corresponding peak in ES+, 514.27799
		5.72378	395.184		378.249	181.15862 (C12H21O+), 199.16928 (C12H23O2+)	HCl adduct, C18H32ClO7-, no good peaks in MS/MS, has corresponding FA adduct, 405.21335, do MS/MS on it; glucoside; of C12 fatty acid; has corresponding peak in ES+ (NH4, 378.24869, and Na adducts)
GPE		5.82471	470.253	78.95786 (PO3-), 96.96865 (H2PO4-), 152.99556 (C3H6PO5-), 171.00627 (C3H8PO6-), 214.04848 (C5H13NPO6-)	472.267		5.81 and 6.67 min; C20H41NPO9-, has phosphate based on MS/MS; has coresponding peak in ES+, 472.26731
GPE		5.92777	468.237	78.95786 (PO3-), 140.01120 (C2H7NPO4-), 152.99544 (C3H6PO5-), 171.00616 (C3H8PO6-), 214.04865 (C5H13NPO6-)	452.24112, 470.25140, 492.23392	86.06057 (C4H8NO+), 280.22711 (C17H30NO2+)	C20H39NPO9-, has phosphate based on MS/MS, has strong 140/214 peaks in MS/MS; keto-version of 470.25281; has corresponding peak in ES+
EA		6.05733	374.255	100.03941 (C4H6NO2-), 102.05493 (C4H8NO2-), 271.19156 (C15H27O4-)	376.269	62.06083 (C2H8NO+), 304.22687 (C19H30NO2+), 322.23764 (C19H32NO3+), 340.24820 (C19H34NO4+), 358.25821 (C19H36NO5+)	C19H36NO6-, has correponding peak in ES+
		6.2231	429.146		412.21		has 2 Cl, C18H31Cl2O7-, no good peaks in MS/MS, appears as 2HCl adduct corresponding to HCl adduct 395.18448 above, but they elute at different retention times. This could be HCl adduct of a keto version of 395.18448; has corresponding peak in ES+ (412.20975)
GPE		6.24066	456.237	78.95790 (PO3-), 96.96864 (H2PO4-), 140.01161 (C2H7NPO4-), 152.99562 (C3H6PO5-), 171.00627 (C3H8PO6-), 214.04898 (C5H13NPO6-)	458.252		C19H39NPO9-; there's another peak of the same mass at 5.57 min, which is present in N2 but not in FCS1; has phosphate based on MS/MS; has corresponding peak in ES+, 458.25196
S		6.67146	384.186	63.96117 (SO2-), 73.98193 (C2H2SO-), 84.04429 (C4H6NO-), 99.98524 (C3H2NSO-), 115.00887 (C4H5NSO-), 177.01006 (C5H7NSO4-)	386.199	74.00652 (C2H4NS+), 116.01665 (C4H6NSO+), 120.01156 (C3H6NSO2+), 120.99554 (C3H5SO3+), 138.02193 (C3H8NSO3+), 162.02185 (C5H8NSO3+), 180.03246 (C5H10NSO4+), 189.16370 (C14H21+)	has S, C19H30NSO5-, has corresponding peak in ES+
		7.27282	287.223		289.238		C16H31O4-, two peaks nearby, has only one double bond equivalent, no fragmentation in MS/MS (small peak for FA loss, so maybe alfa-OH?); has corresponding peak in ES+, 289.23758
S		7.31202	418.147	63.96116 (SO2-), 99.98520 (C3H2NSO-), 115.00886 (C4H5NSO-), 177.01006 (C5H7NSO4-)	420.161		has S, C19H29NSO5Cl-; has corresponding peak in ES+, 420.1612
		7.32939	405.25	see growth medium, ES- table			C20H37O8-, MS/MS is contaminated by 405.01706, may contain glucose; has small NH3 and Na adducts in ES+; also diff. in growth medium
		7.36977	273.207	59.01257 (C2H3O2-)			C15H29O4-, MS/MS is contaminated by 272.99655 and 273.01703; has 59.01257 fragment, maybe beta-OH; also in growth medium; not in ES+; also diff. in growth medium
		7.63305	295.192	59.01252 (C2H3O2-), 87.04398 (C4H7O2-), 207.13919 (C13H19O2-)			C17H27O4-; not in ES+
		7.6694	489.344	59.01259 (C2H3O2-), 73.02834 (C3H5O2-), 299.26010 (C18H35O3-)	491.35849, 513.34003		C26H49O8-; has small corresponding peak in ES+, 491.35849, and its Na adduct, 513.34003
		8.3586	373.26				8.34 and 8.53 min; ascr#24, C20H37O6-, MS/MS maybe contaminated by 373.01065 and couple other peaks
		8.4006	367.145		369.16		has 1 or 2 Cl, C17H29O4Cl2-, no good peaks in MS/MS; has small corresponding peak in ES+, 369.15967
		8.46791	459.333				C25H47O7-; likely bhas#34; p. 61
GPE		8.48566	642.327	59.01258 (C2H3O2-), 71.01259 (C3H3O2-), 78.95784 (PO3-), 89.02328 (C3H5O3-), 96.96855 (H2PO4-), 101.02346 (C4H5O3-), 113.02355 (C5H5O3-), 119.03407 (C4H7O4-), 140.01123 (C2H7NPO4-), 152.99551 (C3H6PO5-), 171.00655 (C3H8PO6-), 333.05933 (C9H18PO11-), 376.10172 (C11H23NPO11-), 418.11206 (C13H25NPO12-), 480.27313 (C22H43NPO8-)	644.341	86.06055 (C4H8NO+), 98.06044 (C5H8NO+), 292.26324 (C19H34NO+), 310.27386 (C19H36NO2+)	C28H53NPO13-, presence of phosphate is supported by MS/MS, GPE glucoside; has corresponding peak in ES+
		8.51432	517.375	59.01260 (C2H3O2-)	519.38956, 541.37170		C28H53O8-, homolog of 489.34399 @ 7.64 min with 2 more CH2; has corresponding peak in ES+, 519.38956, and its Na adduct, 541.37170
		8.61394	550.271	78.95782 (PO3-), 275.20157 (C18H27O2-), 500.27737 (C25H43NPO7-)	516.309	60.08154 (C3H10N+), 86.09695 (C5H12N+), 104.10734 (C5H14NO+), 124.99994 (C2H6PO4+), 184.07330 (C5H15NPO4+), 498.29874 (C26H45NPO6+)	HCl adduct, variable; C26H46ClNPO7-, has corresponding FA adduct, has corresponding peak in ES+; PC of 18:4 fatty acid
		8.92802	401.106				has 2 Cl; C16H28Cl2PO5-, no good peaks in MS/MS; not in ES+
		8.93667	323.223	59.01258 (C2H3O2-)	325.23768, 347.21927		C19H31O4-; has corresponding peak in ES+, 325.23768, and its Na adduct, 347.21927
		8.93667	473.349				C26H49O7-, bhas#36, has corresponding peak in ES+; p. 61
		9.39162	487.365				C27H51O7-; bhas#38; p. 61
		9.43042	401.291				ascr#28, C22H41O6-; p. 61
		9.75011	521.325	73.02821 (C3H5O2-), 485.34872 (C27H49O7-)	509.345		HCl adduct, C27H50ClO7-; has small corresponding Na adduct in ES+, 509.3451
		9.99114	415.307				ascr#30, C23H43O6-, MS/MS is consistent with ascr#30, 9.98 and 10.18 min
GPE		10.3674	770.25	78.95789 (PO3-), 152.99547 (C3H6PO5-)	772.264		has 2 Cl, C33H51NPO13Cl2-, presence of phosphate is supported by MS/MS, probably GPE glucoside; has small corresponding peak in ES+, 772.26401
		10.5466	429.323				ascr#32, C24H45O6-, 10.53 and 10.74 min, MS/MS is consistent with ascr#32
		11.0883	443.339				11.08 and 11.29 min, ascr#34/oscr#34, C25H47O6-, MS/MS is consistent with ascr#34
		11.2551	454.355	86.02370 (C3H4NO2-), 293.28476 (C20H37O-), 349.31137 (C23H41O2-), 367.32156 (C23H43O3-)	438.35837, 478.35092	MS/MS of 438.35837: 100.07610 (C5H10NO+), 420.34717 (C26H46NO3+); MS/MS of 478.35092: 337.27390 (C21H37O3+)	C26H48NO5-, has corresponding peak in ES+
GPE		11.4182	594.379	78.95782 (PO3-), 96.96856 (H2PO4-), 140.01126 (C2H7NPO4-), 152.99547 (C3H6PO5-), 171.00621 (C3H8PO6-), 214.04869 (C5H13NPO6-)			C29H57NPO9-, presence of phosphate is supported by MS/MS, large 140/214 peaks in MS/MS, has corresponding peak in ES+
		11.615	457.354				11.61 and 11.82 min, ascr#36/oscr#36, C26H49O6-, MS/MS is consistent with ascr#36
		11.6756	515.396	1st peak: 73.02826 (C3H5O2-), 367.32181 (C23H43O3-), 385.33298 (C23H45O4-); 2nd peak: 59.01257 (C2H3O2-), 73.02826 (C3H5O2-)	539.392		10.32 and 11.68 min, C29H55O7-; one of these peaks (2nd) is bhas#42; has corresponding Na adduct in ES+, 539.39234; also diff. in growth medium
		12.1158	471.37				12.12 and 12.33 min, ascr#38/oscr#38, C27H51O6-, MS/MS is consistent with ascr#38
ascr		12.3532	634.447	71.01260 (C3H3O2-), 73.02824 (C3H5O2-), 83.04907 (C5H7O-), 86.02361 (C3H4NO2-), 111.04430 (C6H7O2-), 381.37433 (C25H49O2-), 511.43698 (C31H59O5-), 598.46948 (C34H64NO7-)	600.484	62.06078 (C2H8NO+), 100.07603 (C5H10NO+), 434.39923 (C28H52NO2+), 452.40985 (C28H54NO3+)	HCl adduct, C34H65ClNO7-, has corresponding peak in ES+; ascr-ethanolamide, alfa-Me, beta-keto
		12.6145	485.385				ascr#40, C28H53O6-, MS/MS is consistent with ascr#40
ascr		12.6947	543.427	59.01258 (C2H3O2-), 73.02827 (C3H5O2-), 83.04922 (C5H7O-), 111.04433 (C6H7O2-)	567.424		C31H59O7-, formula consistent wih bhas#46; has corresponding peak in ES+; also diff. in growth medium
		13.0996	499.401				ascr#42, C29H55O6-, MS/MS is consistent with ascr#42
ascr		13.1815	533.362	73.02825 (C3H5O2-), 83.04896 (C5H7O-), 111.04438 (C6H7O2-), 497.38492 (C29H53O6-)			HCl adduct, C29H54O6Cl-; not in ES+
		13.2812	668.408		656.427		has 2 Cl, C34H64Cl2NO7-, no good fragments in MS/MS; has corresponding peak in ES+, 656.42676
		13.3864	511.401				13.35 and 13.60 min, 13C1 of 511.40076, C30H55O6-, ascr#43 (double bond), MS/MS is consistent with ascr#43
		13.5809	513.417				ascr#44, 13.47 and 13.56 min, C30H57O6-, MS/MS is consistent with ascr#44
		13.8002	395.19				variable, has Cr, C19H35O5Cr-, gives HCrO4-, CrO3-, and HCrO2- in MS/MS
		14.0719	527.432				ascr#46, C31H59O6-, MS/MS is consistent with ascr#46
		14.393	539.432				ascr#47, unsaturated, C32H59O6-, MS/MS is consistent with ascr#47
		14.4535	639.358				has Cr, C32H59CrO9-, Cr oxide ions in MS/MS, CrO3 adduct of ascr#47
		14.5055	641.374				has Cr, C32H61CrO9-, Cr oxide ions in MS/MS, CrO3 adduct of ascr#48
		14.5763	541.448				ascr#48, 14.52 and 14.65 min, C32H61O6-, MS/MS is consistent with ascr#48
		15.3255	555.463				ascr#50, C33H63O6-, MS/MS is consistent with ascr#50
		15.791	667.39				has Cr, C34H63CrO9-, Cr ions in MS/MS, CrO3 adduct of ascr#51 (C34H63O6-)
ascr		15.9627	581.443	59.01266 (C2H3O2-), 73.02834 (C3H5O2-), 83.04920 (C5H7O-), 111.04437 (C6H7O2-), 409.36954 (C26H49O3-), 521.42023 (C32H57O5-), 539.43195 (C32H59O6-)	605.439		C34H61O7-; has corresponding Na adduct in ES+, 605.43945
		17.1042	583.495				ascr#54, C35H67O6-, MS/MS is consistent with ascr#54
				39 features, 15 are also in ES+ table, 6 are also diff. in growth medium, of which 5 are in growth medium table

## Sheet: S7
Growth medium ES- peaks, high in daf-22											Peaks that are also in L1 table			has corresponding peak in ES+
class	smid-db	rt (min)	m/z (ES-)	MS/MS (ES-)	m/z (ES+)	MS/MS (ES+)	comments
		2.91572	268.178	111.01894 (C4H3N2O2-), 168.09033 (C6H10N5O-), 169. 08533, 186.13303 (C7H16N5O-), 226.15607 (C11H20N3O2-), 251.15167 (C12H19N4O2-)			C12H22N5O2-; double peak; looks like 2nd peak is diff, but peak is broad; present but not diff. in ES+
GPE		4.83872	370.164	78.95776 (PO3-), 96.96848 (H2PO4-), 152.99533 (C3H6PO5-), 171.00607 (C3H8PO6-), 214.04854 (C5H13NPO6-)	372.178		C14H29NPO8-; AA10 has some; phosphate, 153, 171 ions in MS/MS ==> GPE; small 140/214 peaks; has corresponding peak in ES+, 372.17847
		4.93378	296.127	78.95776 (PO3-), 96.96847 (H2PO4-)	298.142		C11H23NPO6-; 3.5x diff., only phosphate peaks in MS/MS; has corresponding peak in ES+, 298.14179, 4.65 and 4.95 min
GPE		5.00403	382.164	see L1s, ES- table			C15H29NPO8-; MS/MS may be contaminated; phosphate, 153, 171 peaks in MS/MS ==> GPE; has corresponding peak in ES+, 384.17872; also diff. in L1 medium
		5.02872	294.111	78.95778 (PO3-), 96.96848 (H2PO4-), 140.01118 (C2H7NPO4-)	296.126		C11H21NPO6-; phosphate and 140.01118 in MS/MS; has corresponding peak in ES+, 296.12592, 4.75 and 5.05 min
		5.48586	470.18	78.95786 (PO3-), 96.96861 (H2PO4-), 140.01123 (C2H7NPO4-), 182.02219 (C4H9NPO5-), 259.02258 (C6H12PO9-), 302.06454 (C8H17NPO9-)	494.177		C18H33NPO11-; has small Na adduct in ES+, 494.17658
GPE		5.77687	560.248	59.01263 (C2H3O2-), 71.01256 (C3H3O2-), 78.95784 (PO3-), 89.02323 (C3H5O3-), 96.96851 (H2PO4-), 101.02345 (C4H5O3-), 113.02349 (C5H5O3-), 119.03407 (C4H7O4-), 140.01112 (C2H7NPO4-), 152.99536 (C3H6PO5-), 171.00615 (C3H8PO6-), 333.05908 (C9H18PO11-), 376.10165 (C11H23NPO11-)	562.262		C22H43NPO13-; phosphate, 153, 333, 376 ions in MS/MS ==> GPE glucoside of C11 fatty acid; has corresponding peak in ES+, 562.26249, ~3x diff.
		5.79398	339.877				has 2 or 3 Cl and maybe Fe; no MS/MS, very small peak in MS1 (e4)
		5.83796	308.127	78.95779 (PO3-), 96.96844 (H2PO4-), *140.01117 (C2H7NPO4-); (* only in 2nd peak)	310.142		C12H23NPO6-; 5.1 and 5.8 min; has corresponding peak in ES+, 310.14191, 5.1, 5.5, and 5.85 min
		5.9381	214.145	57.03327 (C3H5O-), 86.02356 (C3H4NO2-), 127.11205 (C8H15O-)	216.16	62.06083 (C2H8NO+), 86.06059 (C4H8NO+), 95.08598 (C7H11+), 198.14888 (C11H20NO2+)	C11H20NO3-; has HCl adduct; has corresponding peak in ES+, 216.15978
GPE		5.96606	618.29	59.01257 (C2H3O2-), 71.01257 (C3H3O2-), 78.95780 (PO3-), 89.02326 (C3H5O3-), 96.96847 (H2PO4-), 101.02330 (C4H5O3-), 113.02340 (C5H5O3-), 152.99530 (C3H6PO5-), 333.05865 (C9H18PO11-)	620.305		C25H49NPO14-; phosphate, 153, 333, ions in MS/MS ==> GPE glucoside of C14 fatty acid with b-OH; has corresponding peak in ES+, 620.30497, 5.6 and 6.0 min
		6.02898	346.224	100.03944 (C4H6NO2-), 102.05499 (C4H8NO2-)	302.233		C17H32NO6-; 6.0 and 6.8 min; FA adduct; no MS/MS for 6.8 min peak; both peaks have corresponding peaks in ES+, 302.23297
GPE		6.15574	616.274	59.01264 (C2H3O2-), 71.01261 (C3H3O2-), 78.95786 (PO3-), 89.02328 (C3H5O3-), 101.02336 (C4H5O3-), 113.02328 (C5H5O3-), 119.03419 (C4H7O4-), 140.01122 (C2H7NPO4-), 152.99529 (C3H6PO5-), 196.03816 (C5H11NPO5-), 214.04877 (C5H13NPO6-), 376.10126 (C11H23NPO11-)	640.271		C25H47NPO14-; phosphate, glucose fragments, 140, 153, 214, 376 (big peak) ions in MS/MS ==> GPE glucoside of C14 fatty acid with b-keto; has small Na adduct in ES+, 640.27088
		6.1688	303.218	59.01253 (C2H3O2-), 243.19670 (C14H27O3-)	305.232		C16H31O5-; 5.95, 6.1, and 6.2 min; has small corresponding peaks in ES+, 305.23246
GPE		6.27575	548.264	78.95772 (PO3-), 140.01096 (C2H7NPO4-), 152.99518 (C3H6PO5-), 214.04852 (C5H13NPO6-)	550.278		C25H43NPO10-; phosphate, 153, big 140/214 peaks in MS/MS ==> GPE of C20 fatty acid with b-keto and 2 more OH groups; has corresponding peak in ES+, 550.27817
		6.35946	231.16	59.01253 (C2H3O2-), 171.13873 (C10H19O2-)			C12H23O4-; has small corresponding peak in ES+
		6.40047	433.2	78.95779 (PO3-), 96.96851 (H2PO4-)	435.215	301.21588 (C20H29O2+), 319.22668 (C20H31O3+)	C20H34PO8-; only phosphate peaks in MS/MS; has corresponding peak in ES+
GPE		6.46774	670.322	59.01255 (C2H3O2-), 71.01257 (C3H3O2-), 78.95781 (PO3-), 89.02323 (C3H5O3-), 96.96853 (H2PO4-), 101.02341 (C4H5O3-), 113.02347 (C5H5O3-), 119.03407 (C4H7O4-), 140.01128 (C2H7NPO4-), 152.99541 (C3H6PO5-), 171.00607 (C3H8PO6-), *196.03784 (C5H11NPO5-), 333.05951 (C9H18PO11-), 376.10147 (C11H23NPO11-); (* only in 2nd peak)	672.336	86.06060 (C4H8NO+), *112.03963 (C5H6NO2+), 302.24774 (C20H32NO+), 320.25836 (C20H34NO2+), 338.26883 (C20H36NO3+); (* only in 7.2 min peak)	C29H53NPO14-; 6.4 and 7.2 min; ~4x diff.; phosphate, 153, 333, 376 peaks in MS/MS ==> GPE glucoside of C18 fatty acid; 2nd peak (7.2 min) has bigger 140, 214 and 376 peaks ==> b-keto; has corresponding peaks in ES+
		6.49643	315.218	59.01255 (C2H3O2-), 255.19638 (C15H27O3-)	317.232		C17H31O5-; has corresponding peak in ES+, 317.23236
GPE		6.49846	658.322	59.01254 (C2H3O2-), 71.01254 (C3H3O2-), 78.95776 (PO3-), 89.02318 (C3H5O3-), 101.02325 (C4H5O3-), 113.02338 (C5H5O3-), 119.03397 (C4H7O4-), 140.01102 (C2H7NPO4-), 152.99515 (C3H6PO5-), 196.03784 (C5H11NPO5-), 214.04881 (C5H13NPO6-), 333.05975 (C9H18PO11-), 376.10114 (C11H23NPO11-)	660.336	86.06059 (C4H8NO+), 308.25827 (C19H34NO2+), 326.26880 (C19H36NO3+)	C28H53NPO14-; 6.5 and 7.5 min; phosphate, 140/214, glucose fragments, large 376 peak in MS/MS ==> GPE glucoside of C17 fatty acid with b-keto; fragmentation looks very similar for both peaks; 6.5 min has corresponding peak in ES+
		6.51388	243.16	59.01256 (C2H3O2-)			C13H23O4-; MS/MS would be contaminated by 242.98628; only 59.01256 in MS/MS; not in ES+
EA		6.53133	362.255	100.03936 (C4H6NO2-), 102.05502 (C4H8NO2-)	318.264	62.06081 (C2H8NO+), 282.24252 (C17H32NO2+), 300.25311 (C17H34NO3+)	C18H36NO6-; FA adduct corresponding to 352.22623; has corresponding peak in ES+, 318.26416 (see 7.07 in ES+ table)
		6.54007	317.197	59.01258 (C2H3O2-), 129.05504 (C6H9O3-), 195.17531 (C13H23O-), 255.19687 (C15H27O3-), 257.17551 (C14H25O4-), 299.18658 (C16H27O5-)	341.194		C16H29O6-; has small Na adduct in ES+, 341.19357
EA		6.56623	348.239	100.03934 (C4H6NO2-), 102.05499 (C4H8NO2-), 199.17055 (C12H23O2-)	304.248	62.06081 (C2H8NO+), 268.22687 (C16H30NO2+), 286.23743 (C16H32NO3+)	C17H34NO6-; FA adduct corresponding to 338.21078; 6.56 and 6.95 min; MS/MS is the same for both peaks; has corresponding peak in ES+
		6.62909	515.286	59.01253 (C2H3O2-), 71.01254 (C3H3O2-), 89.02335 (C3H5O3-), 101.02341 (C4H5O3-), 113.02348 (C5H5O3-)			C26H43O10-; 6.6 and 7.4 min; both peaks have glucose fragments; glucoside of C20 fatty acid?; 6.6min peak has small correspondnig peak and its NH3 adduct, 534.32825, in ES+
GPE		6.64954	646.321	59.01253 (C2H3O2-), 71.01257 (C3H3O2-), 78.95777 (PO3-), 89.02323 (C3H5O3-), 96.96848 (H2PO4-), 101.02336 (C4H5O3-), 113.02354 (C5H5O3-), 119.03410 (C4H7O4-), 140.01131 (C2H7NPO4-), 152.99536 (C3H6PO5-), 171.00624 (C3H8PO6-), 333.05911 (C9H18PO11-), 376.10126 (C11H23NPO11-)	648.336	86.06059 (C4H8NO+), 278.24780 (C18H32NO+), 296.25845 (C18H34NO2+), 314.26892 (C18H36NO3+)	C27H53NPO14-; 6.6 and 7.0 min; phosphate, 153, 333, 376 (small) ==> GPE glucoside of C16 fatty acid; both peaks have very similar fragmentation; has corresponding peaks in ES+
EA		6.6971	526.279	71.01247 (C3H3O2-), 101.02342 (C4H5O3-), 403.26962 (C21H39O7-)	492.317	62.06083 (C2H8NO+), 86.06059 (C4H8NO+), 294.24261 (C18H32NO2+), 312.25314 (C18H34NO3+)	C24H45O9NCl-; has Cl; corresponding FA adduct is 536.30817; has corresponding peak in ES+, 492.31706, 6.7 min; glucoside of C16 ethanolamide
EA		6.77652	370.26		372.275	6.3 and 6.75 min: 62.06082 (C2H8NO+), **251.20030 (C16H27O2+), *257.18979 (C18H25O+), 275.20044 (C18H27O2+), 293.21097 (C18H29O3+), **311.22168 (C18H31O4+), *318.24268 (C20H32NO2+), 336.25339 (C20H34NO3+), 354.26376 (C20H36NO4+); (* only in 1st peak, ** only in 2nd peak)	C20H36NO5-; no MS/MS, several small peaks in MS1; has corresponding peak in ES+, 372.2746, 6.28 min
		6.78433	314.234	57.03325 (C3H5O-), 86.02354 (C3H4NO2-), 211.17027 (C13H23O2-), 227.20154 (C14H27O2-)	316.249	62.06082 (C2H8NO+), 86.06059 (C4H8NO+), 280.22693 (C17H30NO2+), 298.23746 (C17H32NO3+)	C17H32NO4-, has HCl adduct; has corresponding peak in ES+, 316.24857
		6.81923	228.161	57.03328 (C3H5O-), 86.02355 (C3H4NO2-), 141.12796 (C9H17O-)	230.175		C12H22NO3-; has corresponding peak in ES+, 230.17508, overlaps with non-diff. peak
GPE		6.85021	672.338	59.01252 (C2H3O2-), 71.01255 (C3H3O2-), 78.95777 (PO3-), 89.02321 (C3H5O3-), 96.96848 (H2PO4-), 101.02332 (C4H5O3-), 113.02347 (C5H5O3-), 119.03410 (C4H7O4-), 152.99535 (C3H6PO5-), 171.00618 (C3H8PO6-), 333.05930 (C9H18PO11-), 376.10138 (C11H23NPO11-)	674.352	86.06059 (C4H8NO+), 304.26318 (C20H34NO+), 322.27374 (C20H36NO2+), 340.28430 (C20H38NO3+)	C29H55NPO14-; phosphate, 153, 333, 376 (small) ==> GPE glucoside of C18 fatty acid; has corresponding peak in ES+
		6.86285	473.276	59.01255 (C2H3O2-), 71.01258 (C3H3O2-), 89.02328 (C3H5O3-), 101.02336 (C4H5O3-), 113.02352 (C5H5O3-), 119.03411 (C4H7O4-), 455.26495 (C24H39O8-)	492.317	217.19505 (C16H25+), 235.20549 (C16H27O+), 241.19482 (C18H25+), 259.20529 (C18H27O+), 277.21613 (C18H29O2+), 295.22665 (C18H31O3+)	C24H41O9-; glucose fragments in MS/MS; glucoside of C18 fatty acid; has corresponding NH3 adduct in ES+, 492.31696, 6.85 min
EA		6.89947	442.282		398.29	62.06081 (C2H8NO+), 84.08134 (C5H10N+), 344.25851 (C22H34NO2+), 362.26846 (C22H36NO3+), 380.27863 (C22H38NO4+)	C23H40NO7-; FA adduct, MS/MS would be contaminated by larger peak 442.12769; there's corresponding HCl adduct at 432.25262; C22H39O5NCl-; no MS/MS of 432.25262 (didn't put it on the inclusion list); has corresponding peak in ES+
		6.93265	245.176	59.01255 (C2H3O2-), 185.15448 (C11H21O2-)			C13H25O4-; not in ES+
		6.94437	461.276				C23H41O9-; 6.95 and 7.9 min; MS/MS for both peaks may be contaminated, but looks like it's related to 473.27591 @ 6.86 min; 6.95min peak has corresponding NH3 adduct in ES+, 480.31726
GPE		6.95882	666.29	59.01223 (C2H3O2-), 71.01229 (C3H3O2-), 78.95791 (PO3-), 89.02337 (C3H5O3-), 101.02343 (C4H5O3-), 113.02356 (C5H5O3-), 119.03415 (C4H7O4-), 140.01120 (C2H7NPO4-), 152.99541 (C3H6PO5-), 196.03781 (C5H11NPO5-), 333.05957 (C9H18PO11-), 376.10117 (C11H23NPO11-)	690.287		C29H49NPO14-; phosphate, glucose fragments, 153, 140/214, 376 (large) ==> GPE glucoside of C18 fatty acid with b-keto; has small Na adduct in ES+, 690.28674
		7.03347	619.334	59.01261 (C2H3O2-), 71.01260 (C3H3O2-), 89.02325 (C3H5O3-), 101.02331 (C4H5O3-), 113.02349 (C5H5O3-), 119.03407 (C4H7O4-), 131.03424 (C5H7O4-), 161.04501 (C6H9O5-), 221.06644 (C8H13O7-), 277.21686 (C18H29O2-)	638.375	85.02894 (C4H5O2+), 97.02877 (C5H5O2+), 127.03906 (C6H7O3+), 145.04956 (C6H9O4+), 261.22104 (C18H29O+), 279.23160 (C18H31O2+)	C30H51O13-; diglucoside of C18 fatty acid (?); has corresponding peak in ES+ (638)
		7.0984	391.19	78.95779 (PO3-), 96.96850 (H2PO4-)	393.204		C18H32PO7-; MS/MS would be contaminated by 391.00159; only phosphate peaks in MS/MS; phosphate of C18 fatty acid?; has corresponding peak in ES+, 393.20432
EA		7.11205	394.26	57.03328 (C3H5O-), 86.02367 (C3H4NO2-), 87.04408 (C4H7O2-), 219.17548 (C15H23O-), 254.17548 (C17H20NO-), 307.22791 (C19H31O3-)	396.275	62.06082 (C2H8NO+), 275.20020 (C18H27O2+), 299.19980 (C20H27O2+), 317.21088 (C20H29O3+), 342.24222 (C22H32O2N+), 360.25278 (C22H34O3N+), 378.26349 (C22H36O4N+)	C22H36NO5-; has corresponding peak in ES+
		7.15861	419.266	59.01254 (C2H3O2-), 71.01256 (C3H3O2-), 101.02329 (C4H5O3-), 257.21219 (C15H29O3-)			C21H39O8-; 3 peaks; 2 first peaks aren't diff, only 3rd @ 7.72 min is;MS/MS would be contaminated; glucose fragments and multiple high mass defect ions in MS/MS; also 257.21219 (-162), C15H29O3- for all three peaks ==> glucosides of C15 fatty acids; not in ES+
GPE		7.19139	510.284	78.95777 (PO3-), 96.96841 (H2PO4-), 140.01109 (C2H7NPO4-), 152.99530 (C3H6PO5-), 171.00603 (C3H8PO6-), 214.04860 (C5H13NPO6-)			C23H45NPO9-; 7.2, 8.2, 9.0 min; 1st peak: phosphate, 153, 171, small 140/214; 2nd peak: phosphate, 153, 171, and large 140/214; 3rd peak: no MS/MS; GPE of C18 fatty acid; only 1st peak has corresponding peak in ES+, 512.29841
		7.19437	387.195	78.95778 (PO3-), 96.96848 (H2PO4-)	389.209		C19H32PO6-; shifted from 510.28391; only phosphate ions in MS/MS; phosphate of C19 fatty acid (?); has corresponding peak in ES+
GPE		7.22368	754.427	59.01253 (C2H3O2-), 71.01257 (C3H3O2-), 78.95778 (PO3-), 89.02324 (C3H5O3-), 101.02337 (C4H5O3-), 113.02341 (C5H5O3-), 119.03418 (C4H7O4-), 140.01117 (C2H7NPO4-), 152.99533 (C3H6PO5-), 196.03793 (C5H11NPO5-), 214.04855 (C5H13NPO6-), 333.05994 (C9H18PO11-), 376.10132 (C11H23NPO11-), 640.31067 (C28H51O13NP-), 652.31146 (C29H51O13NP-)	756.441	84.08132 (C5H10N+), 86.06059 (C4H8NO+), 98.09686 (C6H12N+), 115.12326 (C6H15N2+), 308.25830 (C19H34NO2+)	C34H65N3PO13-; phosphate, glucose fragments, 153, 140/214, 333, large 376, 640.31067 (C28H51O13NP-), 652.31146 (C29H51O13NP-) in MS/MS; 640 and 652 peaks aren't in MS1, so it's unlikely to be an adduct of those; has corresponding peak in ES+
		7.23203	475.292	1st peak: 59.01258 (C2H3O2-), 71.01263 (C3H3O2-), 89.02335 (C3H5O3-), 101.02338 (C4H5O3-), 113.02358 (C5H5O3-), 119.03407 (C4H7O4-)	1st peak: 494.3321, 2nd peak: 448.32715		C24H43O9-; 7.3 and 8.3 min; 1st peak has glucose fragments of decent intensity in MS/MS ==> glucoside of C18 fatty acid; 2nd peak is FA adduct, has mostly background and no unfragmented molecular ion in MS/MS; 1st peak has corresponding peak in ES+, larger NH3 adduct, 494.3321, and Na adduct, 499.28839; 2nd peak has NH3 adduct, 448.32715@ 8.22 min
		7.2466	269.176	59.01257 (C2H3O2-), 181.15936 (C12H21O-)			C15H25O4-; peaks before that (6.5 min) and after that (8.0 min) aren't diff.; MS/MS may be contaminated; not in ES+
		7.2611	405.25	59.01254 (C2H3O2-), 71.01256 (C3H3O2-), 85.02828 (C4H5O2-), 89.02320 (C3H5O3-), 101.02332 (C4H5O3-), 113.02348 (C5H5O3-), 119.03400 (C4H7O4-), 225.18605 (C14H25O2-), 243.19635 (C14H27O3-)			C20H37O8-; 4x diff.; MS/MS may be contaminated by 405.01688; glucose fragments, 243.19635 (-162), C14H27O3-; 225.18605, C14H25O2-; glucoside of C14 fatty acid (?); also diff. in L1 medium
		7.28272	259.192	59.01254 (C2H3O2-), 199.17014 (C12H23O2-)			C14H27O4-; not in ES+
		7.30806	273.207	59.01263 (C2H3O2-)			C15H29O4-; slightly shifted from 259.19156; also diff. in L1 medium
		7.31129	309.171	59.01253 (C2H3O2-), 247.17043 (C16H23O2-), 249.14906 (C15H21O3-)			C17H25O5-; MS/MS maybe contaminated; not in ES+
		7.31581	592.277	193.15950 (C13H21O-), 237.14934 (C14H21O3-)	548.286	120.08095 (C8H10N+), 166.08618 (C9H12NO2+), 239.16400 (C14H23O3+), 292.11768 (C15H18NO5+), 310.12823 (C15H20NO6+), glucose fragments	C30H42NO11-; FA adduct; has corresponding HCl adduct (C29H41NO9Cl-); MS/MS would be contaminated; small peak; has 193.15950 (C13H21O-) and 237.14934 (C14H21O3-) in MS/MS, but it's not clear if these fragments are real or contamination; has corresponding peak in ES+, 548.28595
		7.34891	515.287	59.01250 (C2H3O2-), 71.01253 (C3H3O2-), 85.02828 (C4H5O2-), 89.02324 (C3H5O3-), 101.02332 (C4H5O3-), 113.02367 (C5H5O3-), 119.03407 (C4H7O4-), 161.04514 (C6H9O5-)	488.32214, 493.27744		C26H43O10-; FA adduct; has corresponding HCl adduct; glucose fragments in MS/MS; glucoside of C19 fatty acid (?); has corresponding NH3 (488.32214) and Na (493.27744) adducts in ES+
		7.3608	242.177	57.03332 (C3H5O-), 86.02360 (C3H4NO2-), 155.14365 (C10H19O-)	244.191		C13H24NO3-; double peak, 7.4-7.5 min; has corresponding peak in ES+, 244.19103
		7.39885	343.249	59.01250 (C2H3O2-)	345.26377, 367.24548		C19H35O5-; MS/MS would be contaminated by 343.00357; 59 fragment in MS/MS ==> b-OH; has small corresponding peak in ES-, 345.26377, and its Na adduct, 367.24548
		7.40502	419.266	59.01254 (C2H3O2-), 71.01256 (C3H3O2-), 101.02329 (C4H5O3-), 257.21219 (C15H29O3-)			C21H39O8-; third peak in a triad; MS/MS would be contaminated by 419.03287; small peak, a lot of contaminating fragments; glucose fragments, 257.21219 (-162), C15H29O3-; glucoside of C15 fatty acid; not in ES+
GPE		7.42381	668.306	59.01256 (C2H3O2-), 71.01257 (C3H3O2-), 78.95779 (PO3-), 89.02322 (C3H5O3-), 101.02330 (C4H5O3-), 113.02344 (C5H5O3-), 119.03404 (C4H7O4-), 140.01111 (C2H7NPO4-), 152.99530 (C3H6PO5-), 196.03784 (C5H11NPO5-), 214.04851 (C5H13NPO6-), 333.05917 (C9H18PO11-), 376.10123 (C11H23NPO11-)			C29H51NPO14-; phosphate, glucose fragments, 153, 140/214, large 376 ==> GPE glucoside of C18 fatty acid with b-keto; not in ES+
		7.45862	417.205	78.95776 (PO3-), 96.96841 (H2PO4-)	419.22		C20H34PO7-; 3x diff.; only phosphate ions in MS/MS; has corresponding peak in ES+, 419.2197, also ~3x diff.
		7.47363	297.207	1st peak: 155.10735 (C9H15O2-); 2nd peak: 59.01251 (C2H3O2-)	299.2219, 321.20358		C17H29O4-; 7.5 and 8.4 min; MS/MS may be contaminated, especially first peak; 1st peak MS/MS fragment: 155.10735, C9H15O2-; 2nd peak: 59.01251; have corresponding peaks in ES+: 7.55, 8.2 (biggest), and 8.4 min, 299.2219; all three peaks also have NH3 and Na adducts
GPE		7.49972	694.322	59.01252 (C2H3O2-), 71.01254 (C3H3O2-), 78.95777 (PO3-), 89.02322 (C3H5O3-), 101.02332 (C4H5O3-), 113.02348 (C5H5O3-), 119.03411 (C4H7O4-), 140.01117 (C2H7NPO4-), 152.99538 (C3H6PO5-), 196.03781 (C5H11NPO5-), 214.04851 (C5H13NPO6-), 333.05875 (C9H18PO11-), 376.10120 (C11H23NPO11-)	696.336		C31H53NPO14-; 6.9 and 7.5 min; 1st peak fragments: phosphate, glucose fragments, 153, 140/214, large 376; 2nd peak: phosphate, 153, small 333 and 376 ==> GPE glucosides of C20 fatty acid, first with b-keto; has corresponding peaks in ES+, 696.33603, 6.9, 7.5, and 8.3 min
GPE		7.53524	600.28	59.01254 (C2H3O2-), 71.01257 (C3H3O2-), 78.95781 (PO3-), 89.02324 (C3H5O3-), 101.02336 (C4H5O3-), 113.02357 (C5H5O3-), 119.03413 (C4H7O4-), 140.01123 (C2H7NPO4-), 152.99544 (C3H6PO5-), 196.03790 (C5H11NPO5-), 214.04868 (C5H13NPO6-), 333.05988 (C9H18PO11-), 376.10153 (C11H23NPO11-)	602.294		C25H47NPO13-; phosphate, glucose fragments, 153, 140/214, large 376 ==> GPE glucoside of C14 fatty acid with b-keto; has corresponding peak in ES+, 602.29416
		7.53994	400.271	100.03931 (C4H6NO2-), 102.05501 (C4H8NO2-), 251.20146 (C16H27O2-)	356.28		C21H38NO6-; 7.6 and 8.4 min; FA adduct (has corresponding HCl adduct); for 8.4 min see 354 at 8.46 min; has corresponding peak in ES+, 356.27963
		7.55649	353.234	59.01253 (C2H3O2-), 87.04396 (C4H7O2-), 335.22235 (C20H31O4-)	355.248		C20H33O5-; has corresponding peak in ES+, 355.24808
		7.57303	393.206	78.95787 (PO3-), 96.96854 (H2PO4-)	395.22		C18H34PO7-; only phosphate ions in MS/MS; has corresponding peak in ES+, 395.22022
GPE		7.59782	674.353	59.01252 (C2H3O2-), 71.01257 (C3H3O2-), 78.95777 (PO3-), 89.02325 (C3H5O3-), 96.96851 (H2PO4-), 101.02333 (C4H5O3-), 119.03416 (C4H7O4-), 140.01115 (C2H7NPO4-), 152.99536 (C3H6PO5-), 333.05978 (C9H18PO11-), 376.10102 (C11H23NPO11-)	676.367	86.06059 (C4H8NO+), 306.27896 (C20H36NO+), 324.28955 (C20H38NO2+), 342.30011 (C20H40NO3+)	C29H57NPO14-; 7.3, 7.6, 8.0, and 8.6 min; fragmentation for all 4 peaks is similar: phosphate, 153, small 333 and 376 ==> GPE glucoside of C18 fatty acid; has corresponding peaks in ES+
GPE		7.64802	692.306	59.01256 (C2H3O2-), 71.01264 (C3H3O2-), 78.95791 (PO3-), 89.02338 (C3H5O3-), 101.02345 (C4H5O3-), 113.02357 (C5H5O3-), 119.03415 (C4H7O4-), 140.01125 (C2H7NPO4-), 152.99554 (C3H6PO5-), 196.03778 (C5H11NPO5-), 214.04852 (C5H13NPO6-), 333.05911 (C9H18PO11-), 376.10123 (C11H23NPO11-)	694.32	86.06058 (C4H8NO+), 112.03960 (C5H6NO2+), 128.07072 (C6H10NO2+), 342.24258 (C22H32NO2+), 360.25305 (C22H34NO3+)	C31H51NPO14-; phosphate, glucose fragments, 153, 140/214, large 376 ==> GPE glucoside of C20 fatty acid with b-keto; has corresponding peak in ES+
		7.67205	323.187	59.01253 (C2H3O2-), 261.18588 (C17H25O2-), 263.16544 (C16H23O3-), 305.17603 (C18H25O4-)			C18H27O5-; MS/MS may be contaminated by 323.01370; not in ES+
		7.67205	491.193	93.03342 (C6H5O-), 137.02379 (C7H5O3-), 141.12782 (C9H17O-), 165.12813 (C11H17O-), 167.10759 (C10H15O2-), 209.11823 (C12H17O3-), 281.06638 (C13H13O7-)	493.207		C25H31O10-; 3x diff.; has corresponding peak in ES+, 493.20734, 2.5x diff.
		7.69676	271.192	59.01253 (C2H3O2-), 209.19109 (C14H25O-)	273.206		C15H27O4-; has corresponding peak in ES+, 273.20627
		7.72963	283.192	59.01254 (C2H3O2-)	285.206		C16H27O4-; has small peak in ES+, 285.2063
		7.77069	299.223	1st peak: 209.15468 (C13H21O2-), 239.20151 (C15H27O2-), 253.14435 (C14H21O4-); 2nd peak: 59.01254 (C2H3O2-), 237.22261 (C16H29O-)	301.237		C17H31O4-; 7.9 and 9.0 min; has corresponding peak in ES+, 301.23746; 7.9 min peak also has NH3 and Na adducts
		7.77069	342.265	57.03328 (C3H5O-), 86.02369 (C3H4NO2-), 239.20164 (C15H27O2-), 255.23297 (C16H31O2-)	344.27976, 366.26144		C19H36NO4-; has corresponding peak in ES+, 344.27976, and stronger Na adduct, 366.26144
		7.77888	803.361	59.01260 (C2H3O2-), 71.01263 (C3H3O2-), 78.95778 (PO3-), 89.02333 (C3H5O3-), 94.03996 (C4H4N3-), 96.96845 (H2PO4-), 101.02337 (C4H5O3-), 108.01938 (C4H2N3O-), 126.02992 (C4H4N3O2-), 133.01477 (C5HN4O), 150.04163 (C5H4N5O-), 152.99530 (C3H6PO5-), 171.00597 (C3H8PO6-), 333.05911 (C9H18PO11-), 358.25034 (C21H32N5O3-), 376.10226 (C11H23NPO11-), 426.25146 (C23H32N5O3-), 652.31055 (C29H51NPO13-)	805.375	126.05506 (C6H8NO2+), 152.05669 (C5H6N5O+), 206.06717 (C8H8N5O2+), 320.25824 (C20H34NO2+), 471.30801 (C25H39N6O3+), 643.32178 (C28H48N6PO9+)	C34H56N6PO14-; mildly diff.; has corresponding peak in ES+
		7.78706	461.276	1st peak: 59.01257 (C2H3O2-), 71.01259 (C3H3O2-), 89.02322 (C3H5O3-), 101.02332 (C4H5O3-), 113.02344 (C5H5O3-)	434.31122, 439.26660 (only for 2nd peak)		C23H41O9-; 7.0 and 7.9 min; FA adduct; MS/MS may be contaminated; 1st peak: 59 and glucose fragments; 2nd peak: no fragments above background; 7.0min peak is not in ES+, 7.9 min has NH3 (434.31122) and Na (439.26660) adducts in ES+
GPE		7.79524	669.338	59.01253 (C2H3O2-), 71.01255 (C3H3O2-), 78.95778 (PO3-), 89.02323 (C3H5O3-), 101.02335 (C4H5O3-), 113.02350 (C5H5O3-), 119.03408 (C4H7O4-), 140.01118 (C2H7NPO4-), 152.99538 (C3H6PO5-), 171.00626 (C3H8PO6-), 196.03799 (C5H11NPO5-), 214.04878 (C5H13NPO6-), 333.05917 (C9H18PO11-), 376.10123 (C11H23NPO11-)	671.352	86.06055 (C4H8NO+), 112.03957 (C5H6NO2+), 308.25815 (C19H34NO2+), 480.27286 (C22H43NPO8+)	C29H54N2PO13-; 6x diff.; phosphate, glucose fragments, 140, 153, 333, large 376; has corresponding peak in ES+
		7.8275	357.265	59.01253 (C2H3O2-)	359.27939, 381.26102		C20H37O5-; MS/MS would be contaminated by 356.99973; MS/MS --> 59; has corresponding peak in ES+, 359.27939, and its Na adduct, 381.26102
GPE		7.82769	787.366	59.01265 (C2H3O2-), 71.01262 (C3H3O2-), 78.95787 (PO3-), 89.02326 (C3H5O3-), 96.96863 (H2PO4-), 101.02344 (C4H5O3-), 134.04654 (C5H4N5-), 152.99542 (C3H6PO5-), 333.05917 (C9H18PO11-), 652.31042 (C29H51NPO13-)	789.38		C34H56N6PO13-; adenine-GPE glucoside; has corresponding ES+ peak, 789.3801
		7.83575	457.281	59.01253 (C2H3O2-), 71.01254 (C3H3O2-), 85.02827 (C4H5O2-), 89.02322 (C3H5O3-), 101.02334 (C4H5O3-), 113.02350 (C5H5O3-), 119.03418 (C4H7O4-), 277.21704 (C18H29O2-), 295.22778 (C18H31O3-)	459.29554, 476.32220		C24H41O8-; 3x diff.; has corresponding peak in ES+, 459.29554, and stronger NH3 adduct, 476.32220
		7.86784	313.202	59.01255 (C2H3O2-), 251.20143 (C16H27O2-), 253.18069 (C15H25O3-), 295.19089 (C17H27O4-)			C17H29O5-; not in ES+
		7.89174	449.15				7.0 and 8.0 min; no MS/MS, couple small peaks (e4) in MS1
		7.90102	352.25	7.9 min: 57.03331 (C3H5O-), 86.02359 (C3H4NO2-), 111.08054 (C7H11O-), 153.12810 (C10H17O-); 8.2 min: 57.03329 (C3H5O-), 86.02367 (C3H4NO2-), 113.09635 (C7H13O-), 247.20657 (C17H27O-); 9.1 min: 86.02364 (C3H4NO2-), 115.07561 (C6H11O2-), 265.21722 (C17H29O2-)	354.264		C20H34NO4- (M-H), also has HCl and FA adducts; 7.9, 8.2, 8.8, 9.1 min; all 4 peaks have corresponding peaks in ES+, 354.26404
GPE		7.90761	723.385	59.01251 (C2H3O2-), 71.01254 (C3H3O2-), 78.95776 (PO3-), 89.02320 (C3H5O3-), 101.02331 (C4H5O3-), 113.02348 (C5H5O3-), 119.03407 (C4H7O4-), 140.01112 (C2H7NPO4-), 152.99532 (C3H6PO5-), 196.03786 (C5H11NPO5-), 214.04851 (C5H13NPO6-), 333.05920 (C9H18PO11-), 376.10110 (C11H23NPO11-), 640.31067 (C28H51NPO13-)			C33H60N2PO13-; 8.0 and 8.3 min; has corresponding peaks in ES+
GPE		7.92362	614.295	59.01253 (C2H3O2-), 71.01253 (C3H3O2-), 78.95774 (PO3-), 89.02316 (C3H5O3-), 101.02322 (C4H5O3-), 113.02333 (C5H5O3-), 119.03391 (C4H7O4-), 140.01100 (C2H7NPO4-), 152.99525 (C3H6PO5-), 196.03790 (C5H11NPO5-), 214.04857 (C5H13NPO6-), 333.05917 (C9H18PO11-), 376.10123 (C11H23NPO11-)	616.31	86.06059 (C4H8NO+), 282.24255 (C17H32NO2+)	C26H49NPO13-; there's a peak with the same mass that elutes a minute earlier and is present in N2 but not in FCS1; phosphate, glucose fragments, 153, 140/214, large 376 in MS/MS ==> GPE glucoside of C15 fatty acid with b-keto; has corresponding peak in ES+
		7.97072	352.226				C16H35NPO5-; there're 4 peaks from 6.5 to 8.1 min, the 2 outer peaks are bigger but more variabe and less diff.; 2 peaks in the middle are more diff.; MS/MS intensity is low and the fragments are pretty random, only the last peak has phosphate ion; only 8.1 min peak has corresponding peak in ES+, 354.241
GPE		7.97702	438.226	78.95782 (PO3-), 140.01129 (C2H7NPO4-), 152.99542 (C3H6PO5-), 214.04861 (C5H13NPO6-)	440.241		C19H37NPO8-; phosphate, 153, and large 140/214 ==> GPE of C14 fatty acid with b-keto (oxea#14 [Sci.Rep. 2015]); has corresponding peak in ES+, 440.24088
EA		7.97857	426.287	100.03931 (C4H6NO2-), 102.05490 (C4H8NO2-)	382.296	62.06081 (C2H8NO+), 346.27396 (C22H36NO2+), 364.28397 (C22H38NO3+)	C23H40NO6-; FA adduct, has HCl adduct, C22H39NO4Cl-; has corresponding peak in ES+, 382.29562
		8.03348	402.286	100.03925 (C4H6NO2-), 102.05492 (C4H8NO2-), 139.11212 (C9H15O-), 253.21695 (C16H29O2-)	358.295		C21H40NO6-; FA adduct; has corresponding peak in ES+, 358.29541 (8.15, 8.3, 8.55, 9.0, and 9.3 min)
		8.06678	374.255	57.03329 (C3H5O-), 86.02356 (C3H4NO2-), 239.20163 (C15H27O2-), 241.21721 (C15H29O2-)	330.264		C19H36NO6-; FA adduct, has corresponding HCl adduct; has corresponding peak in ES+, 330.26404
		8.09767	376.271	100.03934 (C4H6NO2-), 102.05497 (C4H8NO2-), 227.20148 (C14H27O2-)	332.28		C19H38NO6-; 7.8 and 8.2 min; FA adduct, has corresponding peaks in ES+, 332.27972
		8.09905	293.176	59.01253 (C2H3O2-)	295.191		C17H25O4-; 3 peaks, only the 1st is diff.; only 59 ion in MS/MS; has corresponding peak in ES+, 295.1908, 7.7 min
		8.17546	319.192	59.01253 (C2H3O2-)	321.206		C19H27O4-; MS/MS may be contaminated; only 59 ion in MS/MS; has small corresponding peak in ES+, 321.20624
		8.19144	499.292		472.327		C26H43O9-; FA adduct, has corresponding HCl adduct; no good fragments in MS/MS; has NH3 adduct in ES+, 472.32693
		8.20806	400.271				FA adduct, C21H38O6N-, corresponding to 354.26508 at 8.46 min; see 7.54 min
		8.22382	770.244				has 1 or 2 Cls; no MS/MS, very small peak (e4) in MS1; not in ES+
		8.23167	378.265	57.03327 (C3H5O-), 86.02357 (C3H4NO2-), 219.17531 (C15H23O-), 291.23340 (C19H31O2-)	380.28		C22H36NO4-; has corresponding peak in ES+, 380.27991
		8.26264	285.207	59.01253 (C2H3O2-)	287.222		C16H29O4-; only 59 ion in MS/MS; has corresponding peak in ES+, 287.2219
		8.28061	758.244				has Cl; no MS/MS, very small peak (e4) in MS1; not in ES+
		8.2936	710.314		644.341	86.06059 (C4H8NO+), 98.06046 (C5H8NO+), 292.26334 (C19H34NO+), 310.27390 (C19H36NO2+)	Na formate adduct of 642.32660; peaks coincide; has phosphate and 642 in MS/MS; has corresponding peak in ES+, 644.3411, 3-4x diff.
		8.30004	772.285				no MS/MS, small peak (e4) in MS1; not in ES+
GPE		8.30539	676.311	59.01253 (C2H3O2-), 71.01255 (C3H3O2-), 78.95778 (PO3-), 89.02323 (C3H5O3-), 101.02338 (C4H5O3-), 113.02348 (C5H5O3-), 119.03409 (C4H7O4-), 140.01120 (C2H7NPO4-), 152.99539 (C3H6PO5-), 196.03787 (C5H11NPO5-), 214.04852 (C5H13NPO6-), 333.06006 (C9H18PO11-), 376.10141 (C11H23NPO11-)	678.325		C31H51NPO13-; 2 peaks, only 2nd one is diff.; 2nd (diff) peak: phosphate, glucose fragments, 153, 140/214, large 376 in MS/MS ==> GPE glucoside of C20 fatty acid with b-keto; 1st peak - phosphate, 153, small 333/376; has corresponding peaks in ES+, 678.32511, after a large, non-diff. peak
		8.32902	846.462		848.477		no MS/MS, small peak (low e5) in MS1; has small corresponding peak in ES+, 848.47672
GPE		8.3388	652.311	59.01252 (C2H3O2-), 71.01255 (C3H3O2-), 78.95778 (PO3-), 89.02321 (C3H5O3-), 101.02332 (C4H5O3-), 113.02348 (C5H5O3-), 119.03410 (C4H7O4-), 140.01117 (C2H7NPO4-), 152.99538 (C3H6PO5-), 196.03784 (C5H11NPO5-), 214.04849 (C5H13NPO6-), 333.05930 (C9H18PO11-), 376.10120 (C11H23NPO11-)	654.326	diff. peak: 86.06059 (C4H8NO+), 320.25836 (C20H34NO2+); later peak: 100.07613 (C5H10NO+), 126.05511 (C6H8NO2+), 320.25836 (C20H34NO2+)	C29H51NPO13-; earlier peak (7.5 min) with this mass is only present in N2, while later peak (8.5 min) is only present in FCS1; 8.5 min peak: phosphate, glucose fragments, 153, 140/214, large 376 peak in MS/MS ==> GPE glucoside of C18 fatty acid with b-keto; has corresponding peak in ES+
GPE		8.40706	640.311	59.01252 (C2H3O2-), 71.01254 (C3H3O2-), 78.95776 (PO3-), 89.02321 (C3H5O3-), 101.02331 (C4H5O3-), 113.02347 (C5H5O3-), 119.03407 (C4H7O4-), 140.01114 (C2H7NPO4-), 152.99535 (C3H6PO5-), 196.03780 (C5H11NPO5-), 214.04851 (C5H13NPO6-), 333.05923 (C9H18PO11-), 376.10117 (C11H23NPO11-)	642.325	86.06061 (C4H8NO+), 308.25833 (C19H34NO2+)	C28H51NPO13-; phosphate, glucose fragments, 153, 140/214, large 376 peak in MS/MS ==> GPE glucoside of C17 fatty acid with b-keto; has corresponding peak in ES+
		8.44201	844.447		846.461		no MS/MS, small peak (low e5) in MS1; has small corresponding peak in ES+, 846.46128
		8.45083	321.207	59.01253 (C2H3O2-)	323.222		C19H29O4-; only 59 ion in MS/MS; has corresponding peak in ES+, 323.22168
		8.45937	354.265	8.46 min: 57.03326 (C3H5O-), 86.02354 (C3H4NO2-), 113.09646 (C7H13O-), 153.12807 (C10H17O-), 267.23294 (C17H32O2-); 8.65 min: 57.03323 (C3H5O-), 86.02357 (C3H4NO2-), 141.09154 (C8H13O2-), 267.23279 (C17H32O2-); 9.65 min: 57.03330 (C3H5O-), 86.02353 (C3H4NO2-), 169.15958 (C11H21O-), 267.23267 (C17H32O2-)	356.279	8.4 min: 62.06082 (C2H8NO+), 217.19510 (C16H25+), 259.20563 (C18H27O+), 320.25830 (C20H34NO2+), 338.26880 (C20H36NO3+); 9.7 min: 62.06083 (C2H8NO+), 217.19498 (C16H25+), 235.20555 (C16H27O+), 253.21631 (C16H29O2+), 271.22653 (C16H31O3+), 295.22662 (C18H31O3+), 338.26920 (C20H36NO3+)	C20H36NO4-; 8.4 and 9.7 min; has corresponding peak in ES+
		8.46267	431.301	59.01253 (C2H3O2-)	450.342		C23H43O7-; 2 peaks, 0.2 min apart; only 2nd peak is diff; MS/MS would be contaminated by 431.03183 and others; only 59 in MS/MS; both peaks have NH3 adducts in ES+, 450.34189, 8.9 and 9.1 min
		8.47366	568.29	78.95776 (PO3-), 96.96840 (H2PO4-), 406.23679 (C19H37NPO6-)			C25H47NPO11-; phosphate ions and 406.23679 (-162), C19H37NPO6- in MS/MS; glucoside of phosphoethanolamide of C17 fatty acid (?); not in ES+
GPE		8.47728	452.242	78.95779 (PO3-), 140.01117 (C2H7NPO4-), 152.99535 (C3H6PO5-), 171.00612 (C3H8PO6-), 214.04857 (C5H13NPO6-)	454.257		C20H39NPO8-; there's another peak with this mass, at 7.5 min, which is present in N2 but not in FCS1; phosphate, 153, and large 140/214 peaks in MS/MS ==> GPE of C15 fatty acid with b-keto; has corresponding peak in ES+, 454.25663
GPE		8.60565	807.385	78.95780 (PO3-), 86.02342 (C3H4NO2-), 96.96844 (H2PO4-), 147.04456 (C9H7O2-), 152.99547 (C3H6PO5-), 164.07146 (C9H10NO2-)	809.399	120.08100 (C8H10N+), 292.11795 (C15H18NO5+), 310.12888 (C15H20NO6+), 328.26379 (C22H34NO+), 482.14206 (C18H29NPO12+)	C40H60N2PO13-; has corresponding peak in ES+
		8.68487	553.315	78.95780 (PO3-), 209.02257 (C6H10PO6-)	555.33		C26H50PO10-; has corresponding peak in ES+, 555.32969
GPE		8.70995	684.337	59.01253 (C2H3O2-), 71.01254 (C3H3O2-), 78.95777 (PO3-), 89.02324 (C3H5O3-), 96.96849 (H2PO4-), 101.02334 (C4H5O3-), 113.02348 (C5H5O3-), 119.03407 (C4H7O4-), 140.01114 (C2H7NPO4-), 152.99535 (C3H6PO5-), 171.00600 (C3H8PO6-), 196.03767 (C5H11NPO5-), 214.04849 (C5H13NPO6-), 333.05933 (C9H18PO11-), 376.10141 (C11H23NPO11-)			C30H55NPO14-; phosphate, glucose fragments, 153, small 333/376 ==> GPE glucoside of C19 fatty acid; not in ES+
		8.72649	566.274	78.95774 (PO3-), 140.01099 (C2H7NPO4-), 302.06439 (C8H17NPO9-)			C25H45NPO11-; unsaturated version of 568.28955 at 8.47 min; b-keto; not in ES+
GPE		8.96507	678.327	59.01255 (C2H3O2-), 71.01257 (C3H3O2-), 78.95781 (PO3-), 89.02327 (C3H5O3-), 101.02337 (C4H5O3-), 113.02353 (C5H5O3-), 119.03414 (C4H7O4-), 140.01122 (C2H7NPO4-), 152.99541 (C3H6PO5-), 196.03793 (C5H11NPO5-), 214.048715041 (C11H23NPO11-)	680.341	86.06062 (C4H8NO+), 346.27405 (C22H36NO2+)	C31H53NPO13-; there're several peaks, diff. is the last one, 9.0 min, only ~3x diff; phosphate, glucose fragments, 153, 140/214, large 376 peak in MS/MS ==> GPE glucoside of C20 fatty acid with b-keto; 3 preceding peaks are also GPE glucosides but not b-keto (small 376 peaks); has corresponding peak in ES+
GPE		9.0073	684.41	59.01252 (C2H3O2-), 71.01253 (C3H3O2-), 78.95779 (PO3-), 96.96846 (H2PO4-), 140.01132 (C2H7NPO4-), 152.99547 (C3H6PO5-), 171.00615 (C3H8PO6-), 214.04858 (C5H13NPO6-), 376.10132 (C11H23NPO11-), 652.30872 (C29H51NPO13-)	686.425		C32H63NPO12-; MS/MS may be contaminated by 684.33752; phosphate, 153/171 in MS/MS ==> GPE glucoside of C21 fatty acid; has corresponding peak in ES+, 686.42472
GPE		9.06505	654.327	59.01255 (C2H3O2-), 71.01257 (C3H3O2-), 78.95781 (PO3-), 89.02325 (C3H5O3-), 101.02335 (C4H5O3-), 113.02352 (C5H5O3-), 119.03412 (C4H7O4-), 140.01122 (C2H7NPO4-), 152.99545 (C3H6PO5-), 196.03806 (C5H11NPO5-), 214.04872 (C5H13NPO6-), 333.05911 (C9H18PO11-), 376.10132 (C11H23NPO11-)	656.341	86.06062 (C4H8NO+), 322.27408 (C20H36NO2+)	C29H53NPO13-; 2 peaks, only 2nd one is diff.; phosphate, glucose fragments, 153, 140/214, large 376 peak in MS/MS ==> GPE glucoside of C18 fatty acid with b-keto; first peak is also GPE glucoside but not b-keto (small 376 peak); has corresponding peaks in ES+ (8.29 min)
		9.07506	445.317				bhas, C24H45O7-; has small Na adduct in ES+, 469.3139; p. 111
GPE		9.07506	682.394	78.95781 (PO3-), 140.01123 (C2H7NPO4-), 152.99542 (C3H6PO5-), 171.00623 (C3H8PO6-), 214.04877 (C5H13NPO6-)	684.409		C32H61NPO12-; 2 peaks, 0.3 min apart; both have similar fragmentation: phosphate, 153, large 140/214 peaks; no 333/376, no glucose fragments; has corresponding peak in ES+, 684.40867
		9.23866	726.257				coicides with 626.33185, but doesn't have it in MS/MS; has phosphate and 153 in MS/MS but these can be contamination; not in ES+
GPE		9.36377	478.258	78.95780 (PO3-), 140.01129 (C2H7NPO4-), 152.99544 (C3H6PO5-), 171.00621 (C3H8PO6-), 214.04857 (C5H13NPO6-)	480.272		C22H41NPO8-; 4x diff.; phosphate, 153, large 140/214 peaks in MS/MS ==> GPE of C17 fatty acid with b-keto; has corresponding peak in ES+, 480.27219, 8.5 and 9.0 min
ascr		9.5755	514.376	73.02817 (C3H5O2-), 83.04894 (C5H7O-), 86.02350 (C3H4NO2-), 111.04424 (C6H7O2-), 297.28006 (C19H37O2-), 427.34241 (C25H47O5-)	516.39005, 538.37115		C28H52NO7-; has corresponding peak in ES+, 516.39005, and its Na adduct, 538.37115
		9.5935	567.331	78.95782 (PO3-), 96.96853 (H2PO4-)	569.345		C27H52PO10-; several overlapping peaks; MS/MS may be contaminated; only phosphate in MS/MS, first peak also has small 209.02219 peak; has homolog, 553.31519 at 8.8 and 9.1 min; has corresponding peaks in ES+, 569.34537
		9.60664	401.291				ascr#28, C22H41O6-; 73.02818 and 271.22775 (-130) in MS/MS
ascr		9.86417	576.412	100.03931 (C4H6NO2-), 102.05501 (C4H8NO2-), 427.34274 (C25H47O5-), 512.39484 (C29H54NO6-)	532.421	62.06082 (C2H8NO+), 366.33664 (C23H44NO2+), 384.34717 (C23H46NO3+), 402.35773 (C23H48NO4+)	C30H58NO9-; FA adduct; has corresponding peak in ES+, 532.42105; ethanolamide of bhas
EA		10.0908	298.239	57.03328 (C3H5O-), 86.02362 (C3H4NO2-), 211.20676 (C14H27O-)	300.253	62.06085 (C2H8NO+), 86.06062 (C4H8NO+), 282.24265 (C17H32NO2+)	C17H32NO3-; has corresponding peak in ES+, 300.25345, see 8.57 min in ES- table
ascr		10.164	528.391	57.03336 (C3H5O-), 59.01258 (C2H3O2-), 71.01260 (C3H3O2-), 73.02824 (C3H5O2-), 83.04904 (C5H7O-), 86.02357 (C3H4NO2-), 111.04421 (C6H7O2-), 311.29575 (C20H39O2-), 441.35840 (C26H49O5-), 482.31137 (C26H44NO7-)	530.405	62.06082 (C2H8NO+), 86.06062 (C4H8NO+), 364.32083 (C23H43NO2+), 382.33154 (C23H44NO3), 400.34213 (-130, C23H46NO4+)	C29H54NO7-; has corresponding peak in ES+, 530.40513; ethanolamide of bkas
		10.1955	415.307				ascr#30, C23H43O6-; 73 and 285.24323 (-130), C17H33O3- in MS/MS
		10.2565	473.349				bhas#36?, C26H49O7-; MS/MS: 59 (large), 73, 111, 283.26398 (C18H35O2-); 2 peaks, 0.2 min apart; has NH3 adduct in ES+, 492.38953
ascr		10.4921	542.407	73.02822 (C3H5O2-), 83.04907 (C5H7O-), 86.02354 (C3H4NO2-), 111.04407 (C6H7O2-), 325.31116 (C21H41O2-), 455.37375 (C27H51O5-)	544.421	62.06082 (C2H8NO+), 86.06062 (C4H8NO+), 353.30499 (C22H41O3+), 378.33673 (C24H44NO2+), 396.34735 (C24H46NO3+), 414.35809 (C24H48NO4+)	C30H56NO7-; 10.48 and 10.72 min; has HCl adduct; has corresponding peaks in ES+, 544.42124; ethanolamide of bkas
		10.5969	487.365				bhas; C27H51O7-; MS/MS: 59 (large), 73, 83, 111, 297.27988 (C19H37O2-), 427.34280 (C25H47O5-), 469.35437 (C27H49O6-); 2 peaks, 0.25 min apart; has corresponding peak in ES+ (ammonium adduct, 506)
EA		10.6927	324.255	57.03329 (C3H5O-), 86.02351 (C3H4NO2-), 237.22223 (C16H29O-)	326.269	62.06082 (C2H8NO+), 86.06059 (C4H8NO+), 308.25830 (C19H34NO2+)	C19H34NO3-; has corresponding peak in ES+, 326.26914
		10.7014	387.25				no MS/MS, small peak (e4) in MS1; not in ES+
		10.7537	429.322				ascr#32, C24H45O6-; 73 and -130 fragments in MS/MS
EA		10.8787	358.26		314.269	62.06087 (C2H8NO+), 86.06064 (C4H8NO+), 296.25848 (C18H34NO2+)	C19H36NO5-; FA adduct; MS/MS would be contaminated by 358.23373; no MS/MS, small peak (e4) in MS1; has corresponding peak in ES+, 314.26922
ascr		11.0445	556.423	73.02824 (C3H5O2-), 83.04900 (C5H7O-), 86.02356 (C3H4NO2-), 111.04422 (C6H7O2-), 339.32706 (C22H43O2-), 469.39001 (C28H53O5-)	558.437		C31H58NO7-; has corresponding peak in ES+, 558.43705
		11.1464	501.38				bhas, C28H53O7-; MS/MS: 59 (large), 73, 83, 111, 311.29572 (C20H39O2-), 441.35861 (C26H49O5-), 483.36905 (C28H51O6-); has corresponding peak in ES+ (ammonium adduct, 520)
		11.2862	443.338				ascr#34, C25H47O6-; 2 peaks, 0.25 min apart; 73 and -130 fragments in MS/MS
		11.3102	724.442	78.95779 (PO3-), 96.96851 (H2PO4-), 140.01117 (C2H7NPO4-), 152.99538 (C3H6PO5-), 171.00610 (C3H8PO6-), 214.04857 (C5H13NPO6-)	726.456	100.07612 (C5H10NO+), 424.37854 (C26H50NO3+)	C35H67NPO12-; phosphate, 153, 171, large 140/214 peaks in MS/MS, no glucose fragments, no 333/376; 2 peaks 0.4 min apart; can this be GPE of long-chain ascr? Has corresponding peak in ES+ (see 10.78 in ES+ table)
ascr		11.5477	616.444	73.02824 (C3H5O2-), 83.04900 (C5H7O-), 86.02357 (C3H4NO2-), 111.04422 (C6H7O2-), 353.34253 (C23H45O2-), 483.40524 (C29H55O5-)	572.453	62.06082 (C2H8NO+), 100.07610 (C5H10NON), 406.36783 (C26H48NO2+), 424.37854 (C26H50NO3+), 442.38919 (C26H52NO4+)	C33H62NO9-; FA adduct; has corresponding peak in ES+, 572.45291
		11.6175	457.354				ascr#36, C26H49O6-; 73/83/111, -130 fragments in MS/MS; 2 peaks, 0.25 min apart
		11.6786	515.396				bhas, C29H55O7-; MS/MS: 59 (large), 73, 83, 111, 325.31113 (C21H41O2-), 455.37399 (C27H51O5-), 497.38486 (C29H53O6-); has corresponding peak in ES+ (ammonium adduct, 534.43683); also diff. in L1 medium
ascr		11.7376	719.46	57.03336 (C3H5O-), 59.01258 (C2H3O2-), 71.01260 (C3H3O2-), 73.02824 (C3H5O2-), 83.04904 (C5H7O-), 86.02357 (C3H4NO2-), 111.04421 (C6H7O2-), 381.33804 (C24H45O3-), 511.40027 (C30H55O6-)	692.49542, 697.45056	85.02898 (C4H5O2+), 113.05997 (C6H9O2+), 127.03905 (C6H7O3+), 131.07034 (C6H11O3+), 145.04958 (C6H9O4+), 291.30438 (C21H39+), 319.33578 (C23H43+), 329.32019 (C24H41+), 347.33072 (C24H43O+), 365.34137 (C24H45O2+)	C37H67O13-; 11.52 and 11.76 min; FA adduct, has corresponding HCl adduct; glucoside; has NH3 (692.49542) and Na (697.45056) adducts in ES+
		12.1322	471.37				ascr#38, C27H51O6-; 73/83/111, -130 fragments in MS/MS; 2 peaks, 0.25 min apart; has corresponding peak in ES+
		12.202	529.412				bhas, C30H57O7-; MS/MS: 59 (large), 73, 83, 111, 339.32693 (C22H43O2-), 511.39938 (C30H55O6-); has corresponding peak in ES+, 531.42618, its NH3 (548.45258) and Na (553.40796) adducts
ascr		12.3678	644.476	71.01260 (C3H3O2-), 73.02824 (C3H5O2-), 83.04904 (C5H7O-), 86.02357 (C3H4NO2-), 111.04421 (C6H7O2-), 381.37323 (C25H49O2-), 511.43613 (C31H59O5-)	600.485	62.06082 (C2H8NO+), 100.07616 (C5H10NO+), 434.39944 (C28H52NO2+), 452.41019 (C28H54NO3+), 470.42041 (C28H56NO4+)	C35H66NO9-; FA adduct; has corresponding peak in ES+, 600.48452
ascr		12.5685	747.492	57.03336 (C3H5O-), 59.01258 (C2H3O2-), 71.01260 (C3H3O2-), 73.02824 (C3H5O2-), 83.04904 (C5H7O-), 86.02357 (C3H4NO2-), 111.04421 (C6H7O2-), 409.36755 (C26H49O3-), 539.43164 (C32H59O6-)	720.52637, 725.48145		C39H71O13-; FA adduct; has NH3 (720.52637) and Na (725.48145) adducts in ES+
		12.6295	485.385				ascr#40, C28H53O6-; 73 and -130 fragments in MS/MS
		12.7171	543.427				bhas, C31H59O7-; MS/MS: 59 (large), 73, 83, 111, 353.34229 (C23H45O2-); has corresponding peak in ES+ (ammonium adduct, 562); also diff. in L1 medium
		13.1101	538.378				13C1, 37Cl1 of 535.37787, which has Cl; C29H56O6Cl-; HCl adduct of 499.40112, C29H55O6-, ascr#42; see below
		13.1106	499.401				NaCl adduct of 499.40097; C29H55O6-, ascr#42; 73 and -130 fragments in MS/MS; has corresponding peak in ES+ (ammonium adduct, 518)
		13.3716	511.401				ascr#43, C30H55O6-; 73, 83, 111, -130 fragments in MS/MS
		13.5798	513.416				ascr#44, C30H57O6-, overlapping triple peak; 73 and -130 fragments in MS/MS
		13.7095	571.459				bhas, C33H63O7-; MS/MS would be contaminated by 571.37543, which is NaCl adduct of ascr#44, so ascr fragments may come from it; MS/MS: 59, 73, 83, 111, 383.35272 (C24H47O3-, from ascr#44), 513.41595 (C30H57O6-, from ascr#44); has NH3 (590.49969) and Na (595.45508) adducts in ES+
		14.0891	527.432				ascr#46, C31H59O6-; 73 and -130 fragments in MS/MS
		14.4179	539.432				ascr#47, C32H59O6-; 73, 83, 111, -130 fragments in MS/MS
		14.5401	541.448				ascr#48, C32H61O6-; 73 and -130 fragments in MS/MS
		15.3556	555.463				ascr#50, C33H63O6-; 73 and -130 fragments in MS/MS
							129 features, 44 are also in ES+ table, 3 are also diff. in L1 medium, of which all 3 are in L1 medium table

## Sheet: S8
L1 medium ES+ peaks, high in daf-22									Peaks that are also in growth medium table				has corresponding peak in ES-
class	smid-db	rt (min)	m/z (ES+)	MS/MS (ES+)	m/z (ES-)	MS/MS (ES-)	comments
GPE		1.07537	488.049	see L1s, ES- table			C13H25NPO12Cl2+; has 2 Cl, has corresponding peak in ES- (486.03470)
GPE		1.13039	325.996	see L1s, ES- table			C7H15NPO7Cl2+, has corresponding peak in ES-
		1.16358	363.952				has 2 Cl, no good peaks in MS/MS; not in ES-
		3.08351	268.663		534.305		z=2, MS/MS is likely contaminated by a bigger peak at 269.13611 (C10H17O3N6+), adenine-like fragments in MS/MS; has small z=1 corresponding peak in ES-, 534.30521
		3.51592	339.105	177.05209 (C8H10O3Na+)			C14H20O8Na+, glucoside; has very small M-H and HCl adduct peaks in ES-
		3.51733	362.181				C16H28NO8+, related to 339.10535; p. 63
		3.99477	573.274				z=2, no good peaks in MS/MS
		4.02496	345.7	120.08106 (C8H10N+)			z=2, C8H10N+ fragment in MS/MS, which is pretty generic
		4.41019	298.2	136.06168 (C5H5N5+), 253.16586 (C12H21N4O2+)			z=2, C30H54O7N5(2+); MS/MS may be contaminated by 298.27426 (C18H36O2N+), has ethanolamine ion (62.06078)
		4.67992	330.228	85.02892 (C4H5O2+), 144.10184 (C7H14NO2+), 151.1176 (C10H15O+), 169.12222 (C10H17O2+), 253.14336 (C14H21O4+), 271.15396 (C14H23O5+)			C17H32NO5+, double peak; acylcarnitine fragments in MS/MS; there's earlier peak (3.48 min) with the same mass that's present in N2 but not in FCS1, based on MS/MS it is unrelated; not in ES-
		4.71745	344.207	60.08154 (C3H10N+), 85.02892 (C4H5O2+), 137.09604 (C9H13O+), 144.10184 (C7H14NO2+), 165.09099 (C10H13O2+), 201.11194 (C10H17O4+), 267.122256 (C14H19O5+), 285.13297 (C14H21O6+)			C17H30NO6+, double peak, 4.54 and 4.68 min; acylcarnitine fragments in MS/MS; not in ES-
		4.74709	418.772	112.08730 (C5H10N3+), 130.04994 (C5H8NO3+), 147.07623 (C5H11N2O3+), 183.14906 (C10H19N2O+), 226.67082 (z=2), 253.16588 (C12H21N4O2+), 289.19397, 331.73895 (z=2), 367.24518	834.522		z=2; has small corresponding peak in ES-, 834.52246
		4.76176	374.254	135.11681 (C10H15+), 153.12740 (C10H17O+), 297.16895 (C16H25O5+)			C19H36NO6+, there's earlier peak (3.30 min) with the same mass that's present in N2 but not in FCS1, based on MS/MS it is unrelated; not in ES-
		4.81007	388.233	121.10131 (C9H13+), 131.08559 (C10H11+), 144.10196 (C7H14NO2+), 149.09607 (C10H13O+), 167.10670 (C10H15O2+), 191.10678 (C12H15O2+), 293.13879 (C16H21O5+)			C19H34NO7+, there's earlier peak (3.32 min) with the same mass that's present in N2 but not in FCS1, compare MS/MS (p.49) - unrelated; not in ES-; p. 64
		4.82449	441.793				z=2, small peak, no good fragments in MS/MS; not in ES-
		5.02951	354.742				z=2, small peak, no good fragments in MS/MS, MS/MS would be contaminated by bigger nearby peaks; not in ES-
		5.10352	771.389	127.08683 (C6H11N2O+), 341.14551 (C14H21N4O6+)	769.374		has corresponding peak in ES-, 769.37435
		5.15204	415.23		427.21091, 437.23984		C19H36O8Na+; 5.13 and 5.36 min, Na adduct; has corresponding NH3 adduct (410.27527); poor fragmentation; try MS/MS of 410.27527; has HCl (427.21091) and FA (437.23984) adducts in ES-
		5.15204	438.307				5.13 and 5.36 min, C21H44NO8+, no good peaks in MS/MS; some adduct corresponding to 415.23047 (ethylamine)
		5.16666	413.215		425.19565, 435.22421		C19H34O8Na+; 5.17, 5.45, and 5.55 min; poor fragmentation in MS/MS; try MS/MS of corresponding NH3 adduct, 408.25977; has HCl (425.19565) and FA (435.22421) adducts in ES-
		5.21948	354.225		366.20572, 376.23465		C17H33NO5Na+; has corresponding molecular ion (larger than Na adduct), 332.24335, do MS/MS on it; has HCl (366.20572) and FA (376.23465) adducts in ES-
		5.60015	285.254	84.08130 (C5H10N+), 114.09156 (C6H12NO+), 143.11787 (C7H15N2O+)			C16H33N2O2+; not in ES-
EA		5.62693	362.254	62.06079 (C2H8NO+), 290.21140 (C18H28NO2+), 308.22195 (C18H30NO3+), 326.23248 (C18H32NO4+), 344.24329 (C18H32NO5+)	360.239		C18H36NO6+; ethanolamide; has corresponding ES- peak, 360.23925, MS/MS would be contaminated by larger 360.06772
		5.63516	830.478	167.08136 (C8H11N2O2+), 185.12860 (C9H17N2O2+), 186.12352 (C8H16N3O2+), 212.10272 (C9H14N3O3+), 242.14987 (C11H20N3O3+), 311.17142 (C14H23N4O4+), 476.24997 (C23H34N5O6+)	828.463		has corresponding peak in ES-, 828.46328
		5.65064	416.264	60.08151 (C3H10N+), 85.02892 (C4H5O2+), 177.12743 (C12H17O+), 195.13831 (C12H19O2+)			C21H38NO7+; not in ES-
		5.66782	389.253				ugly looking peak, 389.19370 will contaminate MS/MS; not in ES-
		5.72288	378.249	see L1s, ES- table			NH4 adduct corresponding to Na adduct 383.20398, has corresponding peak in ES- (HCl and FA adducts)
EA		5.81363	346.259	62.06081 (C2H8NO+), 292.22690 (C18H30NO2+), 310.23761 (C18H32NO3+), 328.24811 (C18H34NO4+)	380.22134, 390.25034		C18H36NO5+; ethanolamide; has HCl (380.22134) and FA (390.25034) adducts in ES-
		5.8393	212.201	see growth medium, ES+ table			C13H26NO+; 5.73 and 5.79 min; MS/MS is contaminated by 212.02316, 212.10309, 212.14758; not in ES-; also diff. in growth medium
		5.92491	452.241	see L1s, ES- table			C20H39NPO8+; has corresponding peak in ES- (H2O difference); 470.25140 is differential as well
		5.96772	213.185		229.181		C13H25O2+, fragment of Na adduct 253.17728 (which gives no good fragments in MS/MS), no NH3 adduct; multiple hydrocarbon ions in MS/MS; has corresponding peak in ES-, 229.18088, MS/MS would be contaminated by larger 228.99426; also diff. in growth medium
		5.96922	253.177				C13H26O3Na+, no good fragments in MS/MS
		5.97628	403.269	205.19522 (C15H25+), 223.20561 (C15H27O+), 241.21617 (C15H29O2+)			C21H39O7+, glucoside; not in ES-
		6.05347	376.269	see L1s, ES- table			C19H38NO6+, has corresponding peak in ES-
		6.07925	226.217	84.08131 (C5H10N+)			C14H28NO+
		6.11652	211.169				C13H23O2+; 6.10 and 6.30 min; MS/MS would be contaminated by similar height peak 211.14418, many hydrocarbon ions in MS/MS, including C13H19+ (175.14807); not in ES-; also diff. in growth medium
		6.13661	380.241	69.03419 (C4H5O+), 87.04450 (C4H7O2+), 183.17429 (C12H23O+); do MS/MS on 358.25894	356.24493, 392.22183		C19H35NO5Na+; molecular ion 358.25894; has small peak in ES-, 356.24493 (MS/MS would be contaminated by 356.18350) and its HCl adduct, 392.22183
EA		6.13928	340.248	62.06080 (C2H8NO+), 86.06053 (C4H8NO+), 237.18478 (C15H25O2+), 279.19528 (C17H27O3+), 322.23740 (C19H32NO3+)			C19H34NO4+; ethanolamide; not in ES-; also diff. in growth medium
EA		6.15813	362.29	62.06081 (C2H8NO+), 308.25858 (C19H34NO2+), 326.26901 (C19H36NO3+), 344.27939 (C19H38NO4+)	396.252		C19H40NO5+; ethanolamide; has corresponding HCl adduct in ES-, 396.25222
		6.21119	412.21	see L1s, ES- table			C18H35NO7Cl+; ammonium adduct, has Cl, has corresponding peak in ES- (429.14563), MS/MS would be contaminated by 412.16510
		6.23452	356.243	see growth medium, ES+ table	354.22863, 390.20596		C19H34NO5+, keto version corresponding to 380.24088 above; has small corresponding peak in ES-, 354.22863, and its HCl adduct, 390.20596; also diff. in growth medium
		6.49461	417.285	219.21074 (C16H27+), 237.22116 (C16H29O+), 255.23122 (C16H31O2+)			C22H41O7+, glucoside
EA		6.53985	376.306	62.06078 (C2H8NO+), 322.27393 (C20H36NO2+), 340.28488 (C20H38NO3+), 358.29626 (C20H40NO4+)	410.269		C20H42NO5+; ethanolamide; has HCl adduct in ES-, 410.26852; also diff. in growth medium
		6.65102	386.199	see L1s, ES- table			C19H32NSO5+; has S; has corresponding peak in ES-
		6.67507	314.232	60.05184 (C3H10N+), 85.02892 (C4H5O2+), 144.10190 (C7H14NO2+), 153.12735 (C10H17O+), 171.13786 (C10H19O2+), 255.15886 (C14H23O4+)			C17H32NO4+; there're two overlapping peaks, 6.56 and 6.66, only second one is differential; not in ES-
		6.67566	255.159				C14H23O4+, fragment of 314.23239
		6.72745	452.301	85.02895 (C4H5O2+), 273.18436 (C18H25O2+), 375.21649 (C22H31O5+), 393.22708 (C22H33O6+)			C25H42NO6+; choline
		6.78701	225.185				C14H25O2+, many hydocarbon fragments in MS/MS; not in ES-; also diff. in growth medium
		6.83992	316.248	60.08155 (C3H10N+), 85.02895 (C4H5O2+), 257.17453 (C14H25O4+)			C17H34NO4+; two peaks, 6.82 and 7.04 min, only the first is differential; saturated version of 314.23239 above, MS/MS of the two peaks look the same; 2nd peak coelutes with decanoylcarnitine; also diff. in growth medium but based on MS/MS fragments it's a different molecule
		6.89273	452.247				has S, C24H38NSO5+; fragment of 492.23935p. 67
		6.90109	492.239	94.03932 (C4H7ONa+, rad), 139.02379 (C4H6NO3Na+, rad), 152.03181 (C5H7NO3Na+, rad), 162.10141 (C9H15ONa+, rad), 175.10938 (C10H16ONa+), 201.00661 (C5H8NSO4Na+, rad), 246.15909 (C14H23O2Na+, rad), 315.22937 (C19H32O2Na+), 331.22385 (C19H32O3Na+), 363.19620 (C19H32NSO3Na+)	468.243		C24H39NSO6Na+; related to 452.24683; has corresponding peak in ES- (468.24344)
		6.99404	490.223	104.10735 (C5H14NO+), 173.09363 (C10H14ONa+), 244.14357 (C14H21O2Na+, rad), 313.21317 (C19H30O2Na+), 318.24271 (C20H32NO2+), 329.20874 (C19H30O3Na+), 361.18066 (C19H30OS3Na+)	466.227		C24H37NO6SNa+; Na adduct of 468.24161, do MS/MS of it; has corresponding peak in ES- (466.22726)
		7.12924	310.238	56.05031 (C3H6N+), 82.06567 (C5H8N+), 238.21642 (C15H28NO+), 250.21645 (C16H28NO+), 280.22687 (C17H30NO2+), 292.22681 (C18H30NO2+)			C18H32NO3+; -H2O from 328.24823; not in ES-
		7.13306	350.23				C18H33NO4Na+, H2O + Na of 310.23770, no fragmentation in MS/MS; p. 68
		7.29888	442.143		418.146		has Cl, MS/MS would be contaminated by 442.31619; Na adduct of 420.16077 (also diff., has Cl), do MS/MS on it; has corresponding peak in ES-, 418.14627
		7.3789	374.29	60.08155 (C3H10N+), 85.02895 (C4H5O2+), 144.10207 (C7H14NO2+), 159.06509 (C7H11O4+), 297.20575 (C17H29O4+), 315.21606 (C17H31O5+)			C20H40NO5+; choline
		7.43935	381.18				C19H31O4NaCl+; has Cl, 7.44 and 8.18 min; no fragmentation in MS/MS for either peak; not in ES-
		7.46452	486.208				has Cl, C18H38NO10NaCl+ (?); probably fragment of 526.20038 p. 68
		7.46525	526.2		502.204		has Cl, +H2O, +Na from 486.20782; has small peak in ES-, 502.20398
		7.47207	291.193				C16H28O3Na+; 7.45 and 7.8 min; no fragmentation in MS/MS; Na adduct of 269.21106, do MS/MS on it; not in ES-
		7.54296	434.267	60.08155 (C3H10N+), 85.02895 (C4H5O2+), 291.17218 (C15H28O3Cl+)			C22H41NO5Cl+; has Cl; not in ES-
		7.56304	263.2				C17H27O2+, multiple hydrocarbon fragments up to C17 in MS/MS; not in ES-
		7.60342	347.219				C19H32O4Na+; 6.88, 7.07, 7.37, 7.59, 8.09, 8.91; generally poor/no fragmentation in MS/MS; Na adduct of 325.23734, which is diff. at 6.0, 6.9, and 8.9 min; for MS/MS on 325.23734, see 8.92 min; has corresponding peak in ES-, 323.22284, only at 8.9 min
		7.61502	239.2				C15H27O2+, multiple hydrocarbon ions up to C15 in MS/MS; not in ES-
		7.62743	410.29				C23H40NO5+, MS/MS would be contaminated by 410.23041; not in ES-
		7.6466	355.248		353.234		C20H35O5+, MS/MS would be contaminated by bigger 355.26709; has corresponding peak in ES-, 353.23352
		7.71855	594.296	60.08156 (C3H10N+), 71.07362 (C4H9N+, rad), 86.09695 (C5H12N+), 104.10733 (C5H14NO+), 124.99993 (C2H6PO4+), 184.07332 (C5H15NPO4+)			C28H50NPO8Cl+; has Cl; not in ES-
		7.74928	253.216				C16H29O2+, multiple hydrocarbon ions up to C16 in MS/MS; not in ES-
		7.81082	311.138				C15H25O3NaCl+; has Cl, MS/MS may be contaminated by 311.22162 and 311.25778, no good fragments in MS/MS; not in ES-
		8.07943	325.154				C16H27O3NaCl+; 8.09 and 8.35 min, has Cl; no good fragments in MS/MS, multiple hydrocarbon ions; Na adduct of 303.17236
		8.08812	307.227				C19H31O3+, several peaks from 5.99 to 8.92 min, mostly hydrocarbon ions in MS/MS; not in ES-
		8.34068	287.177				has Cl, C16H28O2Cl+, H2O loss from 305.18799; hydrocarbon fragments up to C16 in MS/MS
		8.34068	322.214	215.17961 (C16H23+), 233.19017 (C16H25O+), 269.16653 (C16H26OCl+), 287.17709 (C16H28O2Cl+)			has Cl, H2O + NH3 of 287.17728; NH3 adduct of 305.18799, has corresponding Na adduct (327.16995); original MS/MS maybe contaminated by 322.27417; not in ES- (303.17349)
		8.37054	336.253	62.06080 (C2H8NO+), 142.08620 (C7H12NO2+), 229.19518 (C17H25+), 257.18985 (C18H25O+), 275.20068 (C18H27O2+), 318.24252 (C20H32NO2+)			C20H34NO3+; not in ES-
		8.38788	351.149				C17H29O3Cl2+; has 2 Cl; one H2O loss and multiple hydrocarbon ions in MS/MS; not in ES-
		8.45431	277.253				C19H33O+, MS/MS would be contaminated by 277.17731 and 277.21637; one water loss and multiple hydrocarbon ions in MS/MS
		8.47847	644.341	see L1s, ES- table			C28H55NPO13+, has corresponding peak in ES-
		8.56187	476.245	139.02397 (C4H6NO3Na+, rad), 152.03172 (C5H7NO3Na+), 184.00375 (C5H7NSO3Na+), 201.00694 (C5H8NSO4Na+, rad), 297.21893 (C19H30ONa+), 299.23489 (C19H32ONa+), 304.26306 (C20H34NO+), 315.22910 (C19H32O2Na+), 347.20117 (C19H32SO2Na+)	452.248		C24H39NSO5Na+; has S; Na adduct of 454.26236, do MS/MS on it; has corresponding peak in ES- (452.24811)
		8.6051	516.309	see L1s, ES- table			C26H47NPO7+; has corresponding peak in ES-
		8.61592	528.308	60.08155 (C3H10N+), 86.09694 (C5H12N+), 104.10733 (C5H14NO+), 124.99994 (C2H6PO4+), 184.07327 (C5H15NPO4+)	526.294		C27H47NPO7+; PC of 19:5 fatty acid; has double peak in ES-, 526.29397, at 9.1 and 9.25 min, which is 3x diff.
		8.62451	492.309	60.08155 (C3H10N+), 86.09694 (C5H12N+), 104.10733 (C5H14NO+), 124.99994 (C2H6PO4+), 184.07327 (C5H15NPO4+)			C24H47NPO7+; PC of 16:2 fatty acid; not in ES-
		8.66749	416.374				C24H50NO4+, no good fragments in MS/MS; not in ES-
		8.9186	325.237	271.20544 (C19H27O+), 289.21613 (C19H29O2+), 307.22672 (C19H31O3+)			C19H33O4+, consequtive H2O losses and multiple hydrocarbon ions in MS/MS; see 347.21927 at 7.60 min
		8.91976	497.345				Na adduct of bhas#36, poor fragmentation, but see -130 loss; has corresponding peak in ES-; p. 61
		8.98862	331.224				C19H32O3Na+, no fragmentation in MS/MS; Na adduct of 309.24249, try MS/MS on it; not in ES-
		9.09358	542.324	60.08155 (C3H10N+), 86.09694 (C5H12N+), 104.10733 (C5H14NO+), 124.99994 (C2H6PO4+), 184.07327 (C5H15NPO4+)			C28H49NPO7+; PC of 20:5; not in ES-
		9.13743	506.324	60.08155 (C3H10N+), 86.09694 (C5H12N+), 104.10733 (C5H14NO+), 124.99994 (C2H6PO4+), 184.07327 (C5H15NPO4+)			C25H49NPO7+; PC of 17:2
		9.14592	787.427	85.02894 (C4H5O2+), 134.03667 (C5H9NOCl+)			may have 2 S or Cl; not in ES-
		9.15504	530.325	60.08155 (C3H10N+), 86.09694 (C5H12N+), 104.10733 (C5H14NO+), 124.99994 (C2H6PO4+), 184.07327 (C5H15NPO4+)			C27H49NPO7+; 9.00 and 9.15 min; PC of 19:4
		9.15504	981.594				probably adduct of 542.32428 and 440.27725; p. 70
		9.26861	512.395	85.02897 (C4H5O2+), 144.10190 (C7H14NO2+), 305.28433 (C21H37O+), 369.30002 (C22H41O4+), 407.31534 (C25H43O4+), 435.30972 (C26H43O5+)			C29H54NO6+; choline of C24 fatty acid or carnitine of C22
		9.34613	616.479	60.08154 (C3H10N+), 85.02895 (C4H5O2+), 104.10737 (C5H14NO+), 113.06002 (C6H9O2+), 144.10196 (C7H14NO2+), 409.33038 (C25H45O4+), 486.41678 (C28H56NO5+)			C34H66NO8+; choline- or carnitine-ascr; not in ES-
		9.41267	481.35				C26H50O6Na+, no fragmentation in MS/MS; Na adduct of 459.36832, small peak, but try MS/MS on it; not in ES-
		9.43306	365.185				C19H31O3NaCl+; has Cl, poor fragmentation, hydrocarbon ions in MS/MS; not in ES-
		9.43306	633.424	60.08154 (C3H10N+), 85.02893 (C4H5O2+), 134.03668 (C5H9NOCl+)			has Cl; not in ES-
		9.50576	544.34	60.08155 (C3H10N+), 86.09694 (C5H12N+), 104.10732 (C5H14NO+), 124.99992 (C2H6PO4+), 184.07329 (C5H15NPO4+)			C28H51NPO7+; PC of 20:4; 9.53, 9.73, and 9.89 min
		9.53728	498.416	85.02897 (C4H5O2+), 144.10196 (C7H14NO2+), 319.30029 (C22H39O+), 421.33096 (C26H45O4+), 439.34210 (C26H47O5+)			C29H56NO5+; choline of C24 fatty acid
		9.55465	514.411	60.08154 (C3H10N+), 85.02893 (C4H5O2+), 144.10188 (C7H14NO2+), 307.29919 (C21H39O+), 335.29385 (C22H39O2+), 371.31561 (C22H43O4+), 437.32651 (C26H45O5+)			C29H56NO6+; saturated analog of 512.39478 at 9.25 min
		9.59805	532.34	60.08157 (C3H10N+), 86.09695 (C5H12N+), *104.10734 (C5H14NO+), 124.99996 (C2H6PO4+), 184.07332 (C5H15NPO4+), (* big in 2nd peak, which may be indicative of 1-acyl-lysoPC regioisomer, JACS, 1996, 118, 451; this elution order, sn-2 first, is consistent with literature, Lipids, 1985, 20, 922)			C27H51NPO7+; PC of 19:3; 9.63 and 9.83 min
		9.63277	526.41052 ?				C30H56NO6+; not in ES-
		9.66334	614.463	60.08158 (C3H10N+), 104.10739 (C5H14NO+), 144.10191 (C7H14NO2+)			C34H64NO8+; not in ES-
		9.69387	520.34	60.08157 (C3H10N+), 86.09695 (C5H12N+), *104.10734 (C5H14NO+), 124.99996 (C2H6PO4+), 184.07332 (C5H15NPO4+), (* big in 2nd peak, which may be indicative of 1-acyl-lysoPC regioisomer, JACS, 1996, 118, 451; this elution order, sn-2 first, is consistent with literature, Lipids, 1985, 20, 922)			C26H51NPO7+; PC of 18:2
		9.91912	528.426	60.08157 (C3H10N+), 85.02896 (C4H5O2+), 144.10199 (C7H14NO2+), 321.31601 (C22H41O+), 349.31030 (C23H41O2+), 385.33112 (C23H45O4+), 451.34134 (C27H47O5+)			C30H58NO6+; not in ES-
		9.92546	495.366				C27H52O6Na+, no good fragments in MS/MS; not in ES-
		9.92734	644.51	60.08154 (C3H10N+), 85.02896 (C4H5O2+), 113.06007 (C6H9O2+), 144.10202 (C7H14NO2+), 437.36246 (C27H49O4+), 514.44727 (C30H60NO5+)			C36H70NO8+; choline- or carnitine-ascr
		9.95706	973.625		971.611		no MS/MS, has corresponding peak in ES-, 971.61087
		9.96254	508.34	60.08157 (C3H10N+), 86.09695 (C5H12N+), *104.10734 (C5H14NO+), 124.99996 (C2H6PO4+), 184.07332 (C5H15NPO4+), (* big in 2nd peak, which may be indicative of 1-acyl-lysoPC regioisomer, JACS, 1996, 118, 451; this elution order, sn-2 first, is consistent with literature, Lipids, 1985, 20, 922)			C25H51NPO7+, not very differential; PC of 17:1
		9.97118	570.473	85.02893 (C4H5O2+)			C33H64NO6+; 9.95 and 10.95 min; choline of C28 fatty acid or carnitine of C26
		10.057	540.426	85.02893 (C4H5O2+)			C31H58NO6+; 9.98, 10.12, and 10.61 min; choline of C26 fatty acid or carnitine of C24
		10.1638	546.356	60.08157 (C3H10N+), 86.09695 (C5H12N+), *104.10734 (C5H14NO+), 124.99996 (C2H6PO4+), 184.07332 (C5H15NPO4+), (* big in 2nd peak, which may be indicative of 1-acyl-lysoPC regioisomer, JACS, 1996, 118, 451; this elution order, sn-2 first, is consistent with literature, Lipids, 1985, 20, 922)			C28H53NPO7+; PC of 20:3
		10.1638	656.51	60.08160 (C3H10N+), 85.02898 (C4H5O2+), 113.06004 (C6H9O2+), 144.10196 (C7H14NO2+), 347.33063 (C24H43O+), 365.34119 (C24H45O2+), 449.36194 (C28H49O4+), 467.37344 (C28H51O5+), 526.44751 (C31H60NO5+)			C37H70NO8+; 10.00 and 10.16 min; choline-ascr
		10.1787	702.551	60.08155 (C3H10N+), 85.02898 (C4H5O2+), 113.06006 (C6H9O2+), 144.10207 (C7H14NO2+), 572.48853 (C33H66NO6+)			C39H76NO9+; choline-ascr
		10.2057	542.442	60.08157 (C3H10N+), 85.02896 (C4H5O2+), 437.36276 (C27H49O4+)			C31H60NO6+; choline of C26 fatty acid
		10.2926	526.447	85.02897 (C4H5O2+)			C31H60NO5+; choline of C26 or carnitine of C24 fatty acid
		10.2926	658.526	85.02896 (C4H5O2+), 113.05994 (C6H9O2+), 528.46271 (C31H62NO5+)			C37H72NO8+; not in ES-
		10.3665	265.216				C17H29O2+, hydrocarbon ions up to C17 in MS/MS; not in ES-
		10.4094	554.441	85.02898 (C4H5O2+)			C32H60NO6+; 10.35 and 10.48 min; choline of C27 or carnitine of C25
		10.6239	556.458	1st peak (10.6 min): 60.08154 (C3H10N+), 85.02895 (C4H5O2+); 2nd and 3rd peaks (12.3 and 12.6 min): 62.06079 (C2H8NO+), *319.33685 (C23H43+), 347.33087 (C24H43O+), *365.34143 (C24H45O2+), 408.38336 (C26H50NO2+), *409.36661 (C26H49O3+), 426.39410 (C26H52NO3+); (* only in 12.6 min peak)			C32H62NO6+; 10.62, 12.31, and 12.56 min; 12.3 ans 12.6 min peaks are ascr ethanolamides (N- and O-); not in ES-
		10.659	672.542	60.08157 (C3H10N+), 85.02895 (C4H5O2+), 113.05993 (C6H9O2+), 144.10181 (C7H14NO2+), 542.47760 (C32H64NO5+)			C38H74NO8+; choline- or carnitine-ascr
		10.7203	684.542	85.02895 (C4H5O2+), 113.05996 (C6H9O2+), 375.36206 (C26H47O+), 477.39417 (C30H53O4+), 554.47809 (C33H64NO5+)			C39H74NO8+; choline- or carnitine-ascr
		10.7771	430.389	62.06081 (C2H8NO+), 394.36786 (C25H48NO2+), 412.37866 (C25H50NO3+)			C25H52NO4+; ethanolamide of saturated C23 fatty acid with 2 OH groups; not in ES-
		10.7815	582.435				C31H61NO7Na+, no good fragments in MS/MS; Na adduct of 560.45276; not in ES-
		10.8385	686.558	85.02895 (C4H5O2+), 113.06007 (C6H9O2+), 479.41135 (C30H55O4+), 556.49463 (C33H66NO5+)			C39H76NO8+; 10.84 and 11.00 min, choline- or carnitine-ascr
		10.9306	554.479	85.02898 (C4H5O2+), *477.39398 (C30H53O4+); (* only 1st peak)			C33H64NO5+; 10.91 and 11.16 min; choline of C28 fatty acid
		11.0626	552.463	85.02895 (C4H5O2+)			C33H62NO5+; choline of C28 or carnitine of C26 fatty acid
		11.1597	496.247		494.232		MS/MS would be contaminated by 496.34039; has corresponding peak in ES-, 494.23202 (double peak, 11.00 and 11.22 min)
		11.1597	513.273				NH3 adduct of 496.24652; MS/MS would be contaminated by 513.36432, no good peaks in MS/MS; small Na adduct is also present
		11.2557	438.358				C26H48NO4+, fragment of 478.35092 (-Na, -H2O); p. 73
		11.2557	478.351	see L1s, ES- table			C26H49NO5Na+, has corresponding peak in ES-; Na adduct of 456.36884
		11.352	444.405				C26H54NO4+, likely fragment of 596.45032 (-Na, -130); p. 74
		11.352	596.45				C32H63NO7Na+; Na adduct of 574.46836 (C32H64NO7+); poor fragmentation in MS/MS, maybe -130 loss; not in ES-
		11.3521	700.573	60.08157 (C3H10N+), 85.02895 (C4H5O2+), 113.06003 (C6H9O2+), 144.10194 (C7H14NO2+), 570.50946 (C33H68NO6+)			C40H78NO8+; choline- or carnitine-ascr
		11.4088	596.393	see L1s, ES- table			C29H59NPO9+, has corresponding peak in ES-, no peak at this RT; big, wide peak @ 11.95 min
		11.545	442.389				11.54 and 11.78 min, C26H52NO4+, fragment of 572.45306 (-130); p. 74
		11.545	572.453	62.06083 (C2H8NO+), 100.07604 (C5H10NO+), 406.36789 (C26H48NO2+), 424.37833 (C26H50NO3+), 442.38989 (C26H52NO4-)	606.415		C32H62NO7+; ethanolamide ascr; has corresponding HCl adduct in ES-, 606.41524
		11.7396	492.367		468.37		C27H51NO5Na+, no fragments in MS/MS; Na adduct of 470.38486, but its MS/MS would be contaminated by 470.42087; has corresponding peak in ES-, 468.37036
		11.8637	440.374	1st peak: 62.06079 (C2H8NO+), 100.07607 (C5H10NO+), 305.28406 (C21H37O+), 323.29443 (C21H39O2+), 341.30490 (C21H41O3+), 353.34052 (C23H45O2+), 379.32086 (C24H43O3+), 422.36273 (C26H48NO3+); 2nd peak: 62.06079 (C2H8NO+), 112.07593 (C6H10NO+), 315.30515 (C23H39+), 333.31534 (C23H41O+), 361.30966 (C24H41O2+), 376.35749 (C25H46NO+), 379.32065 (C24H43O3+), 397.33087 (C24H45O4+), 404.35217 (C26H46NO2+)…	438.359		C26H50NO4+; 11.86 and 12.17 min, 12.17min has corresponding peak in ES-, 438.35949
		11.9374	458.421				C27H56NO4+; -130 fragment from 588.48438; p. 74
		11.9374	610.466		622.447		C33H65NO7Na+, MS/MS would be contaminated by 610.18506, mostly unrelated fragments; seems to be ascr (-130); Na adduct of 588.48438; has HCl adduct in ES-, 622.44656
		12.1032	472.437	62.06081 (C2H8NO+), 88.03981 (C3H6NO2+), 436.41513 (C28H54NO2+), 454.42581 (C28H56NO3+)	636.462		C28H58NO4+; -130 fragment of 602.50000 (it also has Na adduct, 624.48187); has HCl adduct in ES-, 636.46218
		12.1992	553.408		529.412		C30H58O7Na+, very poor fragmentation, but has -130 fragment --> likely ascr, probably bhas#44; has corresponding peak in ES-, 529.41180
		12.2298	490.33	134.03671 (C5H9NOCl+), 357.29968 (C21H41O4+), 454.30786 (C26H45NO3Cl+), 472.31897 (C26H47NO4Cl+)	488.316		C26H49NO5Cl+; has Cl, has corresponding peak in ES-, 488.31583 (has Cl and has HCl adduct)
		12.2894	585.39				C31H59O6NaCl+; has Cl, no fragmentation in MS/MS, not in ES-
		12.3039	410.363	303.30453 (C22H39+), 321.31506 (C22H41O+), 392.35214 (C25H46NO2+)			C25H48NO3+; not in ES-
		12.3126	426.394	62.06079 (C2H8NO+), 291.30429 (C21H39+), 319.33661 (C23H43+), 329.32117 (C24H41+), 347.33054 (C24H43O+), 365.34131 (C24H45O2+), 408.38379 (C26H50NO2+), 409.36792 (C29H49O3+)	590.42		C26H52NO3+; 12.31, 12.56, and 12.79 min; fragment of 578.43964 (-Na, -130); 12.31 and 12.56 min peaks are -130 fragments of 556.45764; 12.31 and 12.56min peaks have HCl adduct in ES-, 590.41982; 12.8 min peak doesn't have 556.45764, so it may be free ethanolamide
		12.3126	578.44				12.32 and 12.56 min, C32H61NO6Na+, no fragmentation but have a little bit of -130 fragment
		12.365	470.421				C28H56NO4+; -130 fragment from 600.18389; p. 75
		12.365	600.484	see L1s, ES- table			C34H66NO7+, has corresponding peak in ES-; ethanolamide ascr
		12.365	645.542				C39H74O5Na+ or, more likely, C36H73N2O7+; dimethylamine adduct of 600.48389; p. 75
		12.3824	628.395				C32H60NO7NaCl+; 12.38 and 12.58 min, has Cl; no fragmentation in MS/MS; has -Na-130 fragment, 476.35062; not in ES-
		12.6268	509.382				C28H54O6Na+; 10.47, 12.61, and 13.56 min; no fragmentation in MS/MS; 12.61 min peak is ascr#40, has corresponding peak in ES-, 485.38547, and its HCl adduct, 521.36194; the other two peaks don't have corresponding peaks in ES-
		12.7128	567.424	see L1s, ES- table			C31H60O7Na+; 12.58 and 12.70 min; poor fragmentation but see -130 fragment for the second peak (first peak is too small) --> ascr; has corresponding peak in ES-
EA		12.8014	468.405	62.06079 (C2H8NO+), 100.07603 (C5H10NO+), 333.31436 (C23H41O+), 351.32611 (C23H43O2+), 369.33624 (C23H45O3+), 381.37213 (C25H49O2+), 407.35168 (C26H47O3+), 450.39398 (C28H52NO3+)	502.368		C28H54NO4+; ethanolamide, not an ascr; has HCl adduct in ES-, 502.36764
		12.8014	476.351	70.02942 (C3H4NO+), 88.03979 (C3H6NO2+), 134.03677 (C5H9NOCl+), 317.32022 (C23H41+), 335.33087 (C23H43O+), 404.35272 (C26H46NO2+), 422.36301 (C26H48NO3+), 440.32919 (C26H47NO2Cl+), 458.34283 (C26H49NO3Cl+)			C26H51NO4Cl+; 12.39, 12.57, and 12.79 min, has Cl; 12.39 and 12.57 min peaks are -Na-130 fragments of 628.39502; these two peaks have corresponding peaks in ES-, 474.33612
		13.0456	581.439		557.443		C32H62O7Na+, poor fragmentation in MS/MS, but see -130 fragment --> ascr; has small NH3 adduct, 576.48376; has corresponding peak in ES-, 557.44293
		13.0852	353.341	317.32022 (C23H41+), 335.33044 (C23H43O+)			C23H45O2+, two water losses and hydrocarbon ions in MS/MS; not in ES-
		13.0978	603.338				C28H53N2O8NaCl+, NaCl adduct of 545.37854 (C28H53N2O8+), should have done MS/MS on it; not in ES-
		13.1325	638.497		650.478		C35H69NO7Na+, very poor fragmentation in MS/MS but can see -130 fragment; Na adduct of 616.51550, try MS/MS on it; has HCl adduct in ES-, 650.47768
		13.1538	504.403				C29H55NO4Na+, no fragmentation in MS/MS; Na adduct of 482.42090; not in ES-
		13.1672	527.348				C28H53O5NaCl+, no fragmentation in MS/MS; not in ES-
		13.1845	551.429				C31H60O6Na+; 12.01, 13.18, 14.07, and 15.12 min; no fragmentation for any of the peaks in MS/MS; only 14.07 min peak, ascr#46, has corresponding peak in ES-, 527.43249
		13.2451	493.387				C28H54O5Na+, formula matches ascr-methylketone with n=18, no fragmentation in MS/MS; has corresponding NH3 adduct, 488.43164; not in ES-
		13.2797	504.382	70.02940 (C3H4NO+), 88.03978 (C3H6NO2+), 134.03679 (C5H9NOCl+), 345.35110 (C25H45+), 363.36221 (C25H47O+), 432.38382 (C28H50NO2+), 450.39468 (C28H52NO3+), 468.36044 (C28H51NO2Cl+), 486.37119 (C28H53NO3Cl+)			C28H55NO4Cl+; not in ES-
		13.2797	656.427	see L1s, ES- table			C34H64NO7NaCl+; has Cl; no fragmentation in MS/MS; has corresponding NH3 adduct, 651.47180, do MS/MS on it; has corresponding peak in ES-, 668.40784
		13.3402	650.497				C36H69NO7Na+, poor fragmentation in MS/MS but see -130 fragment --> ascr; Na adduct of 628.51556; not in ES-
		13.3661	535.397				C30H56O6Na+; 13.36 and 14.44 min; no fragmentation in MS/MS; 14.44 min peak has corresponding NH3 adduct, 530.44189; 13.36 and 13.61min peaks, ascr#43, have corresponding peaks in ES-, 511.40088, its HCl and NaCl adducts
		13.3919	584.489	62.06081 (C2H8NO+), *357.35150 (C26H45+), *375.36185 (C26H47O+), 436.41486 (C28H54NO2+), 454.42551 (C28H56NO3+); (* only in 2nd peak)	618.45156, 628.48253		C34H66NO6+; 13.20 (small) and 13.42 min; ethanolamide; has HCl (618.45156) and FA (628.48253) adducts in ES-
		13.5736	524.348				C28H52NO4NaCl+; has Cl; no fragmentation in MS/MS; Na adduct of 502.36642; not in ES-
		13.6593	567.46		579.44		C32H64O6Na+, no fragmentation in MS/MS; has HCl adduct in ES-, 579.44049
		13.6852	595.455		571.459		C33H64O7Na+, no fragmentation in MS/MS; has corresponding peak in ES-, 571.4588
		13.6939	507.403				C29H56O5Na+, no fragmentation in MS/MS, formula matches ascr-methylketone with n=19; has corresponding NH3 adduct, 502.44751
		13.7594	474.392				C28H53NO3Na+, no fragmentation in MS/MS; Na adduct of 452.41040; not in ES-
		13.9612	516.427	83.4968 (C5H7O+), 95.04945 (C6H7O+), 113.05993 (C6H9O2+), 173.08064 (C8H13O4+), 309.31577 (C21H41O+)			C29H58NO6+; not in ES-
		14.0489	620.487				C35H67NO6Na+, no fragmentation in MS/MS; not in ES-
		14.0663	573.411	443.34735 (C24H47N2O5+), 499.37436 (C27H51N2O6+)			C30H57N2O8+; not in ES-
		14.1632	521.418				C30H58O5Na+, formula matches ascr-methylketone, n=20; no fragmentation in MS/MS
		14.3944	621.387	455.34692 (C25H47N2O5+), 511.37341 (C28H51N2O6+)			may have Cl, small peak, no good fragments in MS/MS; HCl adduct of 585.41083 (C31H57N2O8+), which is a bigger peak
		14.4589	563.429				C32H60O6Na+; 14.45 and 15.57 min; poor fragmentation in MS/MS, but see -130 for the first peak and -C2H4O2 for the second peak; 14.45 min peak is Na adduct of 541.44659, try MS/MS on it, also has Na2 adduct; 15.57 min peak has corresponding NH3 adduct, 558.47375, do MS/MS on it; 14.45 min peak, ascr#47, has corresponding peak in ES-, 539.43219m, and its HCl adduct; 15.57min peak is not in ES-
		14.5286	537.413				C30H58O6Na+, no fragmentation in MS/MS; not in ES-
		14.5917	587.427	457.36313 (C25H49N2O5+), 513.38989 (C28H53N2O6+)			C31H59N2O8+
		14.7485	535.434				C31H60O5Na+, no fragmentation in MS/MS, formula matches ascr-methylketone with n=21
		14.9069	583.41		595.39		C32H61O5NaCl+; has Cl; no fragmentation in MS/MS; has HCl adduct in ES-, 595.39031
		14.9454	549.413				C31H58O6Na+, no fragmentation in MS/MS, -C2H4O2 fragment; has corresponding NH3 adduct, 544.45782; not in ES-
		15.3401	601.442	471.37805 (C26H51N2O5+), 527.40527 (C29H55N2O6+)			C32H61N2O8+
		15.375	549.449				C32H62O5Na+, no fragmentation in MS/MS, formula matches ascr-methylketone, n=22; has corresponding NH3 adduct, 544.49408
		15.8128	565.444				C32H62O6Na+; 14.51 and 15.88 min; no fragmentation in MS/MS; not in ES-
		15.9656	605.439	see L1s, ES- table			C34H62O7Na+, no fragmentation in MS/MS; has corresponding peak in ES-, 581.44305
		16.1046	563.465				C33H64O5Na+, no fragmentation in MS/MS, formula matches ascr-methylketone, n=23
		16.3216	577.444				C33H62O6Na+, no fragmentation in MS/MS, but see loss of C2H4O2; not in ES-
		16.4741	615.439	313.21350 (C19H30O2Na+), 325.21384 (C20H30O2Na+)	591.443		C39H60O4Na+; has corresponding NH3 adduct, 610.48370; has corresponding peak in ES-, 591.44256
		17.2324	577.48				C34H66O5Na+, no fragmentation in MS/MS, formula matches ascr-methylketone, n=24
		17.3378	591.439	289.21381 (C17H30O2Na+), 325.21375 (C20H30O2Na+)			only one peak; Na adduct, has corresponding NH3 adduct, 586.48395; not in ES-
		18.1017	723.575		735.555		C41H80O8Na+, no fragmentation in MS/MS; has corresponding NH3 adduct, 718.62054; has HCl adduct in ES-, 735.55529
		18.1838	591.496				C35H68O5Na+, no fragmentation in MS/MS, formula matches ascr-methylketone, n=25
							C35H68O5Na+, no fragmentation in MS/MS, formula matches ascr-methylketone, n=25
			176 features, 15 are also in ES- table, 8 are also diff. in growth medium, of which all are in growth medium table

## Sheet: S9
Growth medium ES+ peaks, high in FCS1										Peaks that are also in L1 table			has corresponding peak in ES+
class	smid-db	rt (min)	m/z (ES+)	MS/MS (ES+)	m/z (ES-)	MS/MS (ES-)	comments
		0.630068	226.951				(Na formate)*2 adduct of 90.97713
		1.45936	215.212	70.06580 (C4H8N+), 84.08130 (C5H10N+), 86.09692 (C5H12N+), 98.09679 (C6H12N+), 103.12328 (C5H15N2+), 115.12318 (C6H15N2+), 198.18523 (C12H24NO+)			C12H27N2O+; 4x diff.; not in ES-
		2.1834	221.041	193 00987 (C5H9N2S2O2+)			C7H13N2S2O2+; <3x diff.; has S; MS/MS may be contaminated; not in ES-
		4.17922	269.222	100.07607 (C5H10NO+), 169.13344 (C9H17N2O+)			C15H29N2O2+; <3x diff.; not in ES-
		4.79998	431.129	99.05568 (C4H7N2O+), 142.08632 (C7H12NO2+), 144.08078 (C10H10N+), 171.09138 (C11H11N2+), 251.11852 (C16H15N2O+), 339.13470 (C19H19N2O4+), 343.11182 (C18H19N2SO3+), 389.11661 (C19H21N2SO5+)			has 1 or 2 S; <3x diff.; not in ES-
		4.86998	320.28	60.04518 (C2H6NO+), 266.24756 (C17H32NO+), 284.25821 (C17H34NO2+), 302.26874 (C17H36NO3+)			C17H38NO4+; 4x diff.; not in ES-
		5.01835	249.134	105.03378 (C7H5O+), 137.04578 (C5H5N4O+)			C12H17N4O2+; not in ES-
		5.67469	212.201	84.08130 (C5H10N+)			C13H26NO+, most likely fragment; MS/MS: only 84.08130, C5H10N+; also diff. in L1 medium
EA		5.69187	218.175	62.06082 (C2H8NO+), 182.15390 (C11H20NO+), 183.13797 (C11H19O2+), 200.16452 (C11H22NO2+)	252.13738, 262.16626		C11H24NO3+; 5x diff.; ethanolamide; 62 and -H2O fragments in MS/MS; has HCL (252.13738) and FA (262.16626) adducts in ES-, 3x diff.
		5.83171	458.252	86.06059 (C4H8N+), 98.06049 (C5H8NO+), 250.21637 (C16H28NO+), 268.22693 (C16H30NO2+), 286.23761 (C16H32NO3+)	456.237		C19H41NPO9+; has corresponding peak in ES-, 456.23679, 5.85 and 6.25 min
EA		5.91762	360.275	62.06084 (C2H8NO+), 306.24261 (C19H32NO2+), 324.25323 (C19H34NO3+), 342.26385 (C19H36NO4+)	394.23678, 404.26605		C19H38NO5+; ethanolamide; 62 and consequtive loss of 3 H2Os from [M+H]+ in MS/MS; has HCl (394.23678) and FA (404.26605) adducts in ES-
		5.94355	213.185				C13H25O2+, most likely fragment; hydrocarbon ions up to C13 in MS/MS; not in ES-, but 229.18088 is present and diff. in ES-, see L1 medium table; also diff. in L1 medium
		5.94355	216.16	see growth medium, ES- table			C11H22NO3+; keto-version of 218.17520; has corresponding peak in ES-
		5.94355	296.259	first two peaks: 84.08133 (C5H10N+); third peak: 70.06580 (C4H8N+)			5.9, 6.2, and 6.4 min; C18H34NO2+; first two peaks: 84.08133 (C5H10N+) in MS/MS; third peak: 70.06580 (C4H8N+); not in ES-
		6.09137	211.17				C13H23O2+, most likely fragment; MS/MS would be contaminated by 211.14447; hydrocarbon ions up to C13 in MS/MS; also diff. in L1 medium
		6.10901	340.249	see L1, ES+ table			C19H34NO4+; shifted from 211.16954; ethanolamide; 62, 84.08135 (C5H10N+)?, 237.18481 (C15H25O2+), 279.19534 (C17H27O3+), 322.23761 (C19H32O3N+) in MS/MS; not in ES-; also diff. in L1 medium
EA		6.22223	390.285	62.06081 (C2H8NO+), 318.24298 (C20H32NO2+), 336.25311 (C20H34NO3+), 354.26340 (C20H36NO4+), 372.27420 (C20H38NO5+)	388.271		C20H40NO6+; ethanolamide; 62 and 3 consequtive H2O losses in MS/MS; has corresponding peak in ES-, 388.27053
		6.2575	356.243	60.08157 (C3H10N+), 85.02896 (C4H5O2+), 213.07552 (C10H13O5+), 297.16946 (C16H25O5+)			C19H34NO5+; hydrocarbon fragments up to C10, 60.08157 (C3H10N+), 85.02896 (C4H5O2+), 213.07552 (C10H13O5+), 297.16946 (C16H25O5+); also diff. in L1 medium; not in ES-
EA		6.2833	372.275	see growth medium, ES- table			C20H38NO5+; 6.3 and 6.75 min; ethanolamide; has corresponding peak in ES-, 370.2601, 6.78 min
EA		6.34523	376.306	see L1, ES+ table	410.26816, 420.29709		C20H42NO5+; ethanolamide; 2 peaks, 0.15 min apart; 62 and 3 consequtive H2O losses in MS/MS for both peaks; has HCl (410.26816) and FA (420.29709) adducts in ES-; also diff. in L1 medium
GPE		6.39059	662.352	86.06057 (C4H8NO+), 292.26315 (C19H34NO+), 310.27393 (C19H36NO2+), 328.28430 (C19H38NO3+)	660.338		C28H57NPO14+; 6.3 and 7.4 min; has corresponding peak in ES-, 660.33761
EA		6.39672	388.27	62.06081 (C2H8NO+), 86.06059 (C4H8NO+), 249.18483 (C16H25O2+), 291.19537 (C18H27O3+), 309.20581 (C18H29O4+), 334.23749 (C20H32NO3+), 352.24820 (C20H34NO4+), 370.25839 (C20H36NO5+)	386.255		C20H38NO6+; has corresponding peak in ES-, 386.25528
		6.41732	435.215	see growth medium, ES- table			C20H36PO8+; hydrocarbon ions up to C20, 301.21588 (C20H29O2+), 319.22668 (C20H31O3+) in MS/MS; has corresponding peak in ES-; phosphate of C20 fatty acid?
GPE		6.44409	672.336	see growth medium, ES- table			C29H55NPO14+; 6.4 and 7.2 min; has corresponding peak in ES-
GPE		6.49643	660.336	see growth medium, ES- table			C28H55NPO14+; has corresponding peak in ES-; 86.06059 (C4H8ON+), 308.25827 (C19H34O2N+), 326.26880 (C19H36O3N+) in MS/MS
EA		6.5363	300.253	62.06081 (C2H8NO+), 282.24252 (C17H32NO2+)			C17H34NO3+; ethanolamide; 62 and H2O loss in MS/MS; not in ES-
EA		6.53862	374.29	62.06081 (C2H8NO+), 86.06056 (C4H8NO+), 277.21600 (C18H29O2+), 295.22662 (C18H31O3+), 320.25821 (C20H34NO2+), 338.26865 (C20H36NO3+), 356.27927 (C20H38NO4+)	372.27545, 408.25259		C20H40NO5+; 2 peaks 0.2 min apart; ethanolamide of C18 fatty acid; 62, 86, 3 consequtive H2O losses in MS/MS; has corresponding peak in ES-, 372.27545, and its HCl adduct, 408.25259
		6.54502	356.279				C20H38O4N+; coincides with 374.28995, fragment (-H2O); see also 7.6 min
EA		6.56891	304.248	see growth medium, ES- table			C16H34NO4+; ethanolamide; 2 peaks, 6.55 and 6.95 min; 62 and H2O loss in MS/MS for both peaks; has corresponding peak in ES- (FA adduct)
		6.60448	514.374	84.08134 (C5H10N+), 352.32108 (C22H42NO2+), 384.34674 (C23H46NO3+)			C28H52NO7+; not in ES-
GPE		6.63109	648.336	see growth medium, ES- table			C27H55NPO14+; 6.6 and 7.0 min; has corresponding peaks in ES-; 86, 278.24780 (C18H32ON+), 296.25845 (C18H34O2N+), 314.26892 (C18H36O3N+) in MS/MS for both peaks
		6.67533	384.311	first two peaks: 84.08134 (C5H10N+); third peak: 62.06083 (C2H8NO+), 86.06061 (C4H8NO+), 299.25803 (C18H35O3+), 323.25809 (C20H35O3+), 366.30029 (C22H40NO3+)			C22H42NO4+; 6.1, 6.7, and 10.0 min; 10.0min peak has small HCl adduct in ES-, 418.27312
		6.69297	392.316	84.08132 (C5H10N+)			C24H42NO3+; not in ES-
		6.70179	310.274	84.08134 (C5H10N+)			C19H36NO2+; coincides with 392.31598, maybe a fragment
		6.75809	417.332				gradually decreasing, coicides with 372.27435; no MS/MS, a few small peaks (low e5) in the area; probably contamination? Not in ES-
		6.76312	225.185				C14H25O2+, likely a fragment; hydrocarbon ions up to C14 in MS/MS; also diff. in L1 medium
EA		6.78057	316.248	see growth medium, ES- table	314.234		C17H34NO4+; has Na adduct; ethanolamide; 62, 86.06059 (C4H8ON+), 2 consecutive H2O losses in MS/MS; has corresponding peak in ES-, 314.23407; also diff. in L1 medium, although based on fragmentation it's a different molecule
		6.78427	361.306	see growth medium, ES- table			C19H41O4N2+; C2H7N difference from 316.24820, peaks coincide ==> adduct; MS/MS is contaminated by much bigger 361.15265
		6.78798	298.238	see growth medium, ES- table			coincides with 316.24820, -H2O fragment of it; there's another peak with the same mass at 7.5 min (0.7 min later), which is present in N2 but not in FCS1; C17H32O3N+
		6.79802	565.353	see growth medium, ES- table			has S; C28H49N6SO4+; adduct of 250.11189 (big peak) and 316.24820; not in ES-; p. 115
		6.83174	321.204	see growth medium, ES- table			C17H30O4Na+; double peak at 6.8-7.0 and then one at 7.6 min; there's another peak at 8.2 min, but it's gradually decreasing, so maybe contamination; 6.8 - 7 min: poor fragmentation, H2O loss; 7.6 min: no fragments; has corresponding peak in ES- at 7.6 min, 297.20718 (and also at 8.4 min), see at 7.47 min in ES- table
		6.85037	394.28	179.17934 (C13H23+), 197.18999 (C13H25O+)			C19H40NO7+; 6.85 and 7.23 min; MS/MS may be contaminated by 394.25717; hydrocarbon ions up to C9 and C13 (large peaks): 179.17934 (C13H23+) and 197.18999 (C13H25O+) in MS/MS; same fragmentation for both peaks; maybe NH3 adduct of C13 glucoside; not in ES-
		6.85855	492.317	see growth medium, ES- table			C24H46NO9+; 6.7 and 6.9 min; has corresponding peaks in ES-, 1st peak corresponds to 526.27924 in ES-, 2nd peak corresponds to 473.27591 in ES-
GPE		6.87629	674.352	see growth medium, ES- table			C29H57NPO14+; has corresponding peak in ES-; 86, 304.26318 (C20H34ON+), 322.27374 (C20H36O2N+), 340.28430 (C20H38O3N+) in MS/MS
EA		6.91982	398.29	see growth medium, ES- table			C22H40NO5+; ethanolamide; 62, 84.08134 (C5H10N+), hydrocarbon ions up to C18, and 3 consecutive H2O losses from [M+H]+ in MS/MS; has corresponding HCl and FA (442.28156) adducts in ES-
		6.96337	352.285	84.08133 (C5H10N+)			C21H38NO3+; only 84.08133 (C5H10N+) in MS/MS; not in ES-
		6.99868	330.264	62.06081 (C2H8NO+), 86.06056 (C4H8NO+), 294.24258 (C18H32NO2+), 312.25308 (C18H34NO3+)	8.1 min peak has HCl (364.22607) and FA (374.25500) adducts in ES-		C18H36NO4+; 7.0 and 8.1 min; peak in between (7.3 min) is not diff; 62, 86, and 2 consecutive H2O losses in MS/MS; 7.3 min peak has corresponding diff. peak in ES-, 328.24939; 8.1 min peak has HCl (364.22607) and FA (374.25500) adducts in ES-
		7.03401	638.375	see growth medium, ES- table			ammonium adduct; has corresponding peak in ES- (619); glucose fragments, hydrocarbon ions up to C9, 279.23160 (C18H31O2+) in MS/MS
		7.07002	318.264	see comments			C17H36NO4+; 6.5, 7.1, 7.5, 7.9, 8.2 min; MS/MS of 8.2 min peak may be contaminated by 318.24283; 6.5 and 7.5 min peaks: ethanolamides; 62 and 2 H2O losses in MS/MS; 7.1 and 8.2 min peaks - no MS/MS; 7.9 min peak (this is ammonium adduct of C17H33O4+): hydrocarbon ions up to C17, 265.21597 (C17H29O2+), 283.22662 (C17H31O3+); 6.5min peak has corresponding FA adduct in ES-, 362.25516; all peaks but …
		7.07908	324.29	first two peaks have only 84.08130 (C5H10N+), third peak has only 70.06583 (C4H8N+)			C20H38NO2+; double peak; triple peak, first two peaks have only 84.08130 (C5H10N+) in MS/MS; third peak has only 70.06583 (C4H8N+); not in ES-
		7.12832	396.275	see growth medium, ES- table			C22H38NO5+; ethanolamide; hydrocarbon ions up to C18, 275.20020 (C18H27O2+), 299.19980 (C20H27O2+), 317.21088 (C20H29O3+), 342.24222 (C22H32O2N+), 360.25278 (C22H34O3N+), 378.26349 (C22H36O4N+); has corresponding peak in ES-
		7.18024	336.29	84.08128 (C5H10N+)			C21H38NO2+; only 84.08128 (C5H10N+) in MS/MS; not in ES-
		7.19933	550.351	70.06580 (C4H8N+), 84.08132 (C5H10N+), 340.32089 (C21H42NO2+)			C27H53NPO8+; 7.2 and 7.4 min; MS/MS of 7.4 min peak may be contaminated by 550.29199; both peaks have 70.06580 (C4H8N+), 84.08132 (C5H10N+), and 340.32089 (C21H42NO2+) in MS/MS; not in ES-
		7.20614	389.209	see growth medium, ES- table			C19H34PO6+; has corresponding peak in ES-; hydrocarbon ions up to C19 in MS/MS
		7.2354	385.259		419.22079, 429.24957		C21H37O6+; hydrocarbon ions up to C20 in MS/MS; has HCl (419.22079) and FA (429.24957) adducts in ES-
		7.25475	610.38				no MS/MS, but peak is present in MS1; not in ES-
		7.31792	378.724				z=2 corresponding to 756.44116; p. 115
GPE		7.31792	756.441	see growth medium, ES- table			C34H67N3PO13+; has corresponding z=2 ion, 378.72412, which gives the same fragments in MS/MS; has corresponding peak in ES-
		7.37054	325.237		359.19967, 369.22858		C19H33O4+, has Na adduct; hydrocarbon ions up to C16 in MS/MS; 176.10687 (C11H14NO+) and 208.13336 (C12H18NO2+) are probably contamination; has HCl (359.19967) and FA (369.22858) adducts in ES-
		7.38625	640.391	85.02896 (C4H5O2+), 127.03909 (C6H7O3+), 145.04955 (C6H9O4+), 245.22630 (C18H29+), 263.23669 (C18H31O+), 281.24734 (C18H33O2+), 325.11313 (C12H21O10+), 389.26929 (C24H37O4+), 407.27963 (C24H39O5+)	621.35		C30H58NO13+; <3x diff.; ammonium adduct of 623.36456 (C30H55O13+); glucose fragments, 245.22630 (C18H29+), 263.23669 (C18H31O+), 281.24734 (C18H33O2+), 325.11313 (C12H21O10+), 389.26929 (C24H37O4+), 407.27963 (C24H39O5+) in MS/MS; diglucoside of C18 fatty acid; has corresponding peak in ES-, 621.35006, <3x diff.
		7.40872	493.278	see growth medium, ES- table			C25H42O8Na+; doesn't coincide with 623.36461; no fragmentation in MS/MS (parent ion only); has corresponding NH3 adduct, 488.32214, and FA adduct (515.28656) in ES-
		7.43721	548.286	see growth medium, ES- table			C29H42NO9+; has corresponding HCl and FA (592.27716) adducts in ES-
		7.44701	239.201				C15H27O2+, likely fragment?; hydrocarbon ions up to C15 in MS/MS; not in ES-
		7.46978	274.274	7.55 min: 70.06580 (C4H8N+), 88.07617 (C4H10NO+), 102.09171 (C5H12NO+), 106.08656 (C4H12NO2+); 8.15 min: 60.04519 (C2H6NO+), 226.25287 (C15H32N+), 238.25284 (C16H32N+), 256.26331 (C16H34NO+)			C16H36NO2+; several closely spaced peaks; peak at 7.55 min: 70.06580 (C4H8N+), 88.07617 (C4H10ON+), 102.09171 (C5H12ON+), 106.08656 (C4H12O2N+) in MS/MS; peak at 8.15 min: 60.04519 (C2H6ON+), 2 H2O losses from [M+H]+ in MS/MS; not in ES-
		7.53957	263.201				C17H27O2+, likely fragment?; hydrocarbon ions up to C17 in MS/MS; not in ES-
		7.58011	564.366	*70.06580 (C4H8N+), 84.08133 (C5H10N+), 354.33646 (C22H44NO2+); (* only in 2nd peak)			7.35 and 7.6 min; not in ES-
		7.60506	356.279	7.6 min: 62.06080 (C2H8NO+), 320.25815 (C20H34NO2+), 338.26871 (C20H36NO3+); 7.9 min: 60.08157 (C3H10N+), 85.02895 (C4H5O2+), 144.10190 (C7H14NO2+), 157.04950 (C7H9O4+), 297.20569 (C17H29O4+); 8.4, 9.7 min - see growth medium, ES- table	354.26508 (8.4 and 9.7 min peaks)		C20H38NO4+; 7.6, 7.9, 8.5, 9.35, and 9.7 min; see also 6.55 min (fragment); at least 8.5 and 9.7 min have corresponding peaks in ES- (see 354, 8.46 min in ES-)
GPE		7.62993	676.367	see growth medium, ES- table			C29H59NPO14+; 7.3, 7.6, 8.0, and 8.6 min; 86.06059 (C4H8ON+), 306.27896 (C20H36ON+), 324.28955 (C20H38O2N+), 342.30011 (C20H40O3N+) in MS/MS of three peaks; no MS/MS for 8.0 min peak; has corresponding peaks in ES-
GPE		7.67938	694.32	see growth medium, ES- table			C31H53NPO14+; has corresponding peak in ES-; 86.06058 (C4H8NO+), 112.03960 (C5H6NO2+), 128.07072 (C6H10NO2+), 342.24258 (C22H32NO2+), 360.25305 (C22H34NO3+)
		7.72278	271.227	171.13783 (C10H19O2+), 235.20549 (C16H27O+), 253.21591 (C16H29O2+)			C16H31O3+; first peak out of two; has ammonium and Na adducts; hydrocarbon ions up to C16, 171.13783 (C10H19O2+), 235.20549 (C16H27O+); 253.21591 (C16H29O2+); not in ES-
EA		7.74473	340.248	62.06082 (C2H8NO+), 237.18471 (C15H25O2+), 261.18457 (C17H25O2+), 279.19531 (C17H27O3+), 322.23746 (C19H32NO3+)	374.211		C19H34NO4+; shifted from 271.22681; there's a peak with the same mass in N2 a little earlier (0.1 min difference); has Na adduct; ethanolamide; 62, hydrocarbon ions up to C15, 237.18471 (C15H25O2+), 261.18457 (C17H25O2+), 279.19531 (C17H27O3+), 322.23746 (C19H32O3N+) in MS/MS; has corresponding HCl adduct in ES-, 374.21063
		7.7734	446.311				C23H44NO7+; ammonium adduct; hydrocarbon ions up to C17 in MS/MS; glucoside; has FA adduct in ES-
EA		7.77512	332.279	62.06082 (C2H8NO+), 149.05975 (C9H9O2+), 296.25830 (C18H34NO2+), 314.26886 (C18H36NO3+)	366.24173, 376.27060		C18H38NO4+; 7.75 and 8.15 min; both peaks have similar fragmentation; ethanolamide; 62, 149.05975 (C9H9O2+), 2 consecutive H2O losses from [M+H]+ in MS/MS; has HCl (366.24173) and FA (376.27060) adducts in ES-
		7.77713	711.383	70.06581 (C4H8N+), 86.06056 (C4H8NO+), 112.03960 (C5H6NO2+), 308.25818 (C19H34NO2+)	709.369		C32H60N2PO13+ but shifted from 332.27942; 7.75 and 8.15 min; first peak is also shifted from 694.32031, so it's not its ammonium adduct; MS/MS is the same for both peaks: 70.06581 (C4H8N+), 86.06056 (C4H8NO+), 112.03960 (C5H6NO2+), 308.25818 (C19H34NO2+); has corresponding peak in ES-, 709.36856
		7.81077	805.375	see growth medium, ES- table			C34H58N6PO14+; <3x diff, variable; has corresponding peak in ES-
		7.87651	671.352	see growth medium, ES- table			C29H56N2PO13+; 5x diff.; has corresponding peak in ES-
		7.93693	616.31	see growth medium, ES- table			C26H51NPO13+; there's another peak with the same mass, which elutes ~1 min earlier and present in N2 but not in FCS1; has corresponding peak in ES-; 86.06059 (C4H8ON+), 282.24255 (C17H32O2N+)
		7.94972	790.364	98.06042 (C5H8NO+), 100.07605 (C5H10NO+), 126.05504 (C6H8NO2+), 137.04576 (C5H5N4O+), 320.25818 (C20H34NO2+), 456.29672 (C25H38N5O3+), 610.29980 (C28H45N5PO8+), 628.31067 (C28H47N5PO9+)	788.349		C34H57N5PO14+; variable, <3x diff.; has corresponding peak in ES-, 788.34945
		8.03033	382.295	see growth medium, ES- table			C22H40NO4+; has Na adduct; ethanolamide; 62, hydrocarbon ions up to C20, 2 H2O losses from [M+H]+ in MS/MS; has HCl and FA (426.28662) adducts in ES-
		8.06789	725.399	84.08131 (C5H10N+), 86.06054 (C4H8NO+), 308.25815 (C19H34NO2+), 480.27219 (C22H43NPO8+)	723.384		C33H62N2PO13+; 4x diff.; has Na adduct; 2 peaks: 8.0 and 8.3 min, MS/MS is the same for both: 84.08131 (C5H10N+), 86.06054 (C4H8NO+), 308.25815 (C19H34NO2+), 480.27219 (C22H43NPO8+); both peaks have corresponding peaks in ES-, 723.3843
		8.11537	287.258	233.22635 (C17H29+), 251.23686 (C17H31O+), 269.24741 (C17H33O2+)			C17H35O3+; double peak, MS/MS is similar for both peaks; has Na adduct; hydrocarbon ions up to C14, 3 consecutive H2O losses from [M+H]+; not in ES-
		8.16919	380.279	62.06082 (C2H8NO+), 283.20547 (C20H27O+), 301.21603 (C20H29O2+), 326.24811 (C22H32NO+), 344.25812 (C22H34NO2+), 362.26947 (C22H36NO3+)	378.26498, 414.24222		C22H38NO4+; has Na adduct; ethanolamide; 62, hydrocarbon ions up to C20, loss of 2 H2O in MS/MS; has corresponding peak in ES-, 378.26498, and its HCl adduct, 414.24222
		8.2172	448.327				C23H46NO7+; ammonium adduct; hydrocarbon ions up to C17 in MS/MS; glucoside?; has corresponding peak in ES- (FA adduct, 475, see 7.23 min)
EA		8.24361	328.248	62.06081 (C2H8NO+), 207.17445 (C14H23O+), 225.18495 (C14H25O2), 243.19543 (C14H27O3+), 249.18501 (C16H25O2+), 267.19543 (C16H27O3+), 310.23758 (C18H32NO3+)	326.23367, 362.21100		C18H34NO4+; has Na adduct; ethanolamide; 62, hydrocarbon ions up to C14, 207.17445 (C14H23O+), 225.18495 (C14H25O2), 243.19543 (C14H27O3+), 249.18501 (C16H25O2+), 267.19543 (C16H27O3+), 310.23758 (C18H32NO3+); has corresponding peak in ES-, 326.23367, and its HCl adduct, 362.21100, although the peaks appear to gradually decrease
		8.26311	644.341	see growth medium, ES- table			C28H55NPO13+; 4x diff.; has -glucose fragment in MS1; 86.06059 (C4H8ON+), 98.06046 (C5H8ON+), 292.26334 (C19H34ON+), 310.27390 (C19H36O2N+) in MS/MS; has corresponding peak in ES- (710.3139, 8.29 min)
		8.27133	682.287				5x diff.; only high mass defect peaks in MS/MS that don't make sense; not in ES-
		8.27144	688.304				only high mass defect peaks in MS/MS that don't make sense; not in ES-
		8.28798	656.341	see growth medium, ES- table			C29H55NPO13+; has Na adduct; there's a big peak first, which is not diff., ~1min later is diff. peak; 1st peak gives 86, 98, 304.26349 (C20H34ON+), 322.27408 (C20H36O2N+); 2nd peak has 86 (higher) and 322.27408 (C20H36NO2+); has corresponding peaks in ES- (see 9.07 min in ES- table)
		8.32205	654.326	see growth medium, ES- table			C29H53NPO13+; 8.3 and 8.7 min; 1st peak: 86 and 320.25836 (C20H34NO2+); 2nd peak: 100.07613 (C5H10NO+), 126.05511 (C6H8NO2+), and 320.25836 (C20H34NO2+); has corresponding peak in ES-
		8.32421	285.242	231.21075 (C17H27+), 249.22121 (C17H29O+), 267.23169 (C17H31O2+)			C17H33O3+; 7.7 and 8.5 min, peak at 8.75 is not diff.; has ammonium and Na adducts; 1st peak: hydrocarbon ions up to C17, 3 consecutive H2O losses from [M+H]+; 2nd peak: same but 95.08599 (C7H11+) is more pronounced; not in ES-
		8.39396	308.258	86.06059 (C4H8NO+)			C19H34NO2+; 8.5 and 9.2 min; peak at 10.2 min is reverse-diff. (high in N2); 86 in MS/MS; 8.5min peak coincides with 642.32513 and is its fragment; only 10.2 min peak (reverse diff.) has corresponding peak in ES- (HCl adduct, 342.22045)
		8.39396	642.325	see growth medium, ES- table			C28H53NPO13+; has -glucose fragment in MS1, has ammonium and Na adducts; 86.06061 (C4H8ON+), 308.25833 (C19H34O2N+) in MS/MS; has corresponding peak in ES-
		8.57078	300.253	8.6 min: 187.13293 (C10H19O3+), 223.20592 (C15H27O+), 229.29560 (C17H25+), 247.20572 (C17H27O+), 265.21622 (C17H29O2+); 10.1 min: see growth medium, ES- table			C17H34NO3+; variable; peak with this mass at 10.1 min is diff., 8.6 min peak: hydrocarbon ions up to C10, 187.13293 (C10H19O3+), loss of ammonia and 3 consecutive H2O losses from [M+H]+, this is ammonium adduct, found [M+H]+ and corresponding Na adduct; 10min peak: ethanolamide; 62, 86, and H2O loss from [M+H]+; 10.1min peak has corresponding peak in ES-, 298.23877, and its HCl adduct, 334.21591
		8.58647	409.342	84.08136 (C5H10N+), 326.26907 (C19H36NO3+)			C24H45N2O3+; 3x diff.; 2 peaks, 0.25 min apart; 84.08136 (C5H10N+), 326.26907 (C19H36NO3+) small in MS/MS, same fragmentation for both peaks; not in ES-
		8.61534	630.325	86.06063 (C4H8NO+), 296.25845 (C18H34O2N+)	628.311		C27H53NPO13+; the first peak at 7.8 min is not diff., but the second, ~1 min later is; 1st peak: 86, 98, 278.24780 (C18H32ON+), 296.25845 (C18H34O2N+) in MS/MS; 2nd (smaller) peak: 86 and 296.25845 (C18H34O2N+) only in MS/MS; has corresponding peak in ES-, 628.31082
		8.64385	809.399	see growth medium, ES- table			C40H62N2PO13+; 3x diff.; has corresponding peak in ES-
		8.68129	785.398	120.08100 (C8H10N+), 166.08617 (C9H12NO2+), 292.11777 (C15H18NO5+), 304.26337 (C20H34NO+), 310.12827 (C15H20NO6+), 482.14243 (C18H29NPO12+)	783.384		C38H62N2PO13+; 3x diff.; has corresponding peak in ES-, 783.38394
		8.68243	606.413	1st peak: 84.08137 (C5H10N+), 396.38370 (C25H50NO2+); 2nd and 3rd peaks additionally have 70.06584 (C4H8N+)			C31H61NPO8+; double peak; 1st peak: 84.08137 (C5H10N+) and 396.38370 (C25H50NO2+) in MS/MS; 2nd and 3rd peaks additionally have 70.06584 (C4H8N+); has homolog at 9.17 min; phosphorylated version of 526.44696 at 9.27 min; not in ES-
		8.82452	281.247	199.16922 (C12H23O2+), 245.22639 (C18H29+), 263.23706 (C18H31O+)			C18H33O2+; there's another peak with mass at 11.0 min, which is present in N2 but not in FCS1; hydrocarbon ions up to C14; 199.16922 (C12H23O2+), 2 cosecutive H2O losses from [M+H]+ in MS/MS; not in ES-
		8.90231	309.242	255.21057 (C19H27+), 273.22134 (C19H29O+), 291.23181 (C19H31O2+)			C19H33O3+; hydrocarbon ions up to C16, 3 consecutive H2O losses from [M+H]+ in MS/MS; not in ES-
		8.92188	680.341	see growth medium, ES- table			C31H55NPO13+; has ammonium and Na adducts; 86.06062 (C4H8NO+), 346.27405 (C22H36NO2+) in MS/MS; has corresponding peak in ES-
		9.06231	482.288	86.06061 (C4H8NO+), 98.06048 (C5H8NO+), 292.26331 (C19H34NO+), 310.27390 (C19H36NO2+)			C22H45NPO8+; first peak at 8.2 min is 3x diff, second peak ~0.5 min later is not diff.; 86, 98, 292.26331 (C19H34NO+), 310.27390 (C19H36NO2+) in MS/MS; fragmentation is the same for both peaks; at least one of these peaks has corresponding peak in ES-, 480.27337
		9.16133	389.266	371.25580 (C22H36O3Na+)			C22H38O4Na+; one H2O loss, no other fragments in MS/MS; not in ES-
		9.17098	620.429	1st peak: 84.08136 (C5H10N+), 410.39923 (C26H52NO2+) in MS/MS; 2nd peak additionally has 70.06589 (C4H8N+)			C32H63NPO8+; two peaks, 0.3 min apart; 1st peak: 84.08136 (C5H10N+) and 410.39923 (C26H52NO2+) in MS/MS; 2nd peak additionally has 70.06589 (C4H8N+); has homolog at 8.68 min
		9.26695	526.447	1st peak: 84.08138 (C5H10N+), 396.38397 (C25H50NO2+); 2nd peak additionally has 70.06586 (C4H8N+), 200.12827 (C10H18NO3+)			C31H60NO5+; 2 peaks, 0.25 min apart; 1st peak: 84.08138 (C5H10N+) and 396.38397 (-130, C25H50NO2+); 2nd peak additionally has 70.06586 (C4H8N+) and 200.12827 (C10H18NO3+); not in ES-
ascr		9.30626	518.406	62.06084 (C2H8NO+), 352.32092 (C22H42NO2+), 370.33163 (C22H44NO3+), 388.34225 (C22H46NO4+)	552.368		C28H56NO7+; MS/MS would be contaminated by 518.32465; ethanolamide of bhas; has HCl adduct in ES-, 552.36788
		9.31804	460.363	277.25278 (C19H33O+), 295.26318 (C19H35O2+), 313.27374 (C19H37O3+)			C25H50NO6+; ammonium adduct; there's corresponding Na adduct C25H46O6Na+; 277.25278 (C19H33O+), 295.26318 (C19H35O2+), 313.27374 (-130, C19H37O3+) in MS/MS; [M+H]+ would be C25H47O6+; ascr#34 (C25H47O6-) elutes at 11.3 min; not in ES-
EA		9.34865	360.311	62.06087 (C2H8NO+), 306.27951 (C20H36NO+), 324.29004 (C20H38NO2+), 342.30054 (C20H40NO3+)	394.27282, 404.30197		C20H42NO4+; 9.4 and 10.2 min; both peaks are ethanolamides; 62 and 3 consecutive H2O losses from [M+H]+ in MS/MS; both peaks have HCl (394.27282) and FA (404.30197) adducts in ES-
ascr		9.45015	540.462	9.05 min: 56.05032 (C3H6N+), 84.08134 (C5H10N+), 214.14383 (C11H20NO3+), 410.39905 (C26H52NO2+); 9.30 min: 70.06588 (C4H8N+), 126.09155 (C7H12NO+), 200.12823 (C10H18NO3+), 410.39905 (C26H52NO2+)			C32H62NO5+; 9.05 and 9.30 min; not in ES-
		9.50925	584.286	124.03950 (C6H6NO2+), 215.17972 (C16H23+), 268.08145 (C12H14NO6+)	618.24795, 628.27679		C32H42NO9+ ?; looks like nicotinic acid fragment in MS/MS; has small HCl (618.24795) and FA (628.27679) adducts in ES-
		9.5374	227.201				C14H27O2+; 8.6 and 9.6 min, peak in between is not diff.; has ammonium and Na adducts; hydrocarbon ions up to C14 in MS/MS for all 3 peaks; not in ES-
		9.55978	307.227	271.20648 (C19H27O+), 289.21625 (C19H29O2+)			C19H31O3+; peak at 9.6 min is variable but peak at 10.2 min is more stable and diff.; has Na adduct; MS/MS may be contaminated by 306.27924; hydrocarbon ions and 2 H2O losses from [M+H]+ in MS/MS; not in ES-
		9.61252	538.372				C28H53O7NNa+, Na adduct of 516.38965; p. 117
ascr		9.61592	516.39	62.06082 (C2H8NO+), 86.06058 (C4H8NO+), *325.27368 (C20H37O3+), 350.30515 (C22H40NO2+), 368.31589 (C22H42NO3+), 386.32648 (C22H44NO4+)	514.37515, 550.35229, 560.38098		C28H54NO7+; 9.35 and 9.55 min; has Na adduct, 538.37170; ethanolamide of bkas; has corresponding peak in ES-, 514.37515, its HCl (550.35229) and FA (560.38098) adducts
ascr		9.88794	532.421	see growth medium, ES- table			C29H58NO7+; has Na adduct; 2 peaks, 0.25 min apart; 62, 366.33664 (C23H44NO2+), 384.34717 (C23H46NO3+), 402.35773 (-130, C23H48NO4+) in MS/MS for both peaks; homolog of 518.40570 at 9.25 min, ethanolamide of bhas; has FA adduct in ES-, 576.41205
ascr		10.1627	530.405	see growth medium, ES- table			C29H56NO7+; has -130 fragment; 2 peaks, 0.25 min apart; ethanolamide of bkas; 62, 86, 364.32083 (C23H43NO2+), 382.33154 (C23H44NO3+), 400.34213 (-130, C23H46NO4+) in MS/MS; 2nd peak additionally has 339.28937 (C21H39O3+); has corresponding peak in ES-
ascr		10.2028	488.395	305.28369 (C21H37O+), 323.29449 (C21H39O2+), 341.30518 (C21H41O3+)			C27H54NO6+; ammonium adduct; 305.28369 (C21H37O+), 323.29449 (C21H39O2+), 341.30518 (-130, C21H41O3+); not in ES- but corresponding mass in ES-, 469.35409, has three diff. peaks at 11.7-12.1 min
		10.4419	568.419		580.399		C30H59NO7Na+; 10.2 and 10.5 min; MS/MS of the 1st peak may be contaminated; no good fragments in MS/MS; has HCl adduct in ES-, 580.39929
ascr		10.4883	544.421	see growth medium, ES- table			C30H58NO7+; 10.5 and 10.7 min; 62, 86, 353.30499 (C22H41O3+), 378.33673 (C24H44NO2+), 396.34735 (C24H46NO3+), 414.35809 (C24H48NO4+) in MS/MS for both peaks; ethanolamide of bkas; has corresponding peaks in ES-, 542.40674
EA		10.5296	398.327	62.06086 (C2H8NO+), 86.06065 (C4H8NO+), 277.25314 (C19H33O+), 295.26285 (C19H35O2+), 313.27380 (C19H37O3+), 337.27383 (C21H37O3+), 380.31607 (C23H42NO3+)	396.31231, 432.28900		C23H44NO4+; has Na adduct; ethanolamide; 62, 86, hydrocarbon ions, 277.25314 (C19H33O+), 295.26285 (C19H35O2+), 313.27380 (C19H37O3+), 337.27383 (C21H37O3+), 380.31607 (C23H42NO3+) in MS/MS; has small corresponding peak in ES-, 396.31231, and its HCl adduct, 432.28900
		10.593	506.406				10.6 and 10.8 min; ammonium adduct of 489.37903, C27H56O7N+ --> C27H53O7+, 489.37903 has -130 fragment; MS/MS of the 1st peak may be contaminated by 506.32486; hydrocarbon ions up C21, 305.28409 (C21H37O+), 323.29474 (C21H39O2+), 341.30533 (C21H41O3+), 359.31567 (-130, C21H43O4+), 365.30511 (C23H41O3+) in MS/MS; has corresponding peak in ES- (487)
EA		10.69	326.269	see growth medium, ES- table			C19H36NO3+; ethanolamide; 62, 86, -H2O in MS/MS; has corresponding peak in ES-
		10.7037	337.31	241.21593 (C15H29O2+), 255.23206 (C16H31O2+)			C22H41O2+; 10.7 and 11.2 min; hydrocarbon ions up to C16, 241.21593 (C15H29O2+), 255.23206 (C16H31O2+) in MS/MS; not in ES-
ascr		10.7086	502.41	319.29962 (C22H39O+), 337.31009 (C22H41O2+), 355.32086 (C22H43O3+)			C28H56NO6+; ammonium adduct; hydrocarbon ions, 319.29962 (C22H39O+), 337.31009 (C22H41O2+), 355.32086 (-130, C22H43O3+) in MS/MS; not in ES-, but corresponding mass in ES-, 483.36993, and its HCl adduct have three diff. peaks at 12.2-12.7 min (has homologs, -14 and +14)
		10.7764	726.456	see growth medium, ES- table			C35H69NPO12+; has ammonium and Na adducts; 10.8 min (small) and 11.3 min (large) peaks; both peaks have 100.07612 (C5H10NO+) and 424.37854 (C26H50NO3+) in MS/MS; 1st peak additionally has 406.36810 (C26H48NO2+); has corresponding peak in ES- (see 11.31 in ES- table)
ascr		10.7851	560.453	62.06082 (C2H8NO+), 376.35785 (C25H46NO+), 394.36826 (C25H48NO2+), 412.37866 (C25H50NO3+), 430.38922 (C25H52NO4+)	594.415		C31H62NO7+; has Na adduct; 62, 376.35785 (C25H46NO+), 394.36826 (C25H48NO2+), 412.37866 (C25H50NO3+), 430.38922 (-130, C25H52NO4+) in MS/MS; ethanolamine of bhas?; has HCl adduct in ES-, 594.415
		10.8286	440.374	11.9 min: 62.06082 (C2H8NO+), 325.27362 (C20H37O3+), 341.30457 (C21H41O3+), 379.32086 (C24H43O3+), 422.36288 (C26H48NO3+); 12.2 min: 62.06082 (C2H8NO+), 325.27362 (C20H37O3+), 355.32077 (C22H43O3+), 379.32089 (C24H43O3+), 422.36288 (C26H48NO3+)	474.336		C26H50NO4+; 11.9 and 12.2 min; wide peak around 11 min is not diff; has Na adduct; 12.2 min peak is a doublet; 11.9 min and 1st 12.2 min peaks are ethanolamides; 11.9 min MS/MS: 62, 325.27362 (C20H37O3+), 341.30457 (C21H41O3+), 379.32086 (C24H43O3+), 422.36288 (C26H48NO3+), 12.2 min MS/MS: 62 (first peak), 325.27362 (C20H37O3+), 355.32077 (C22H43O3+), 379.32089 (C24H43O3+), 422.36288 (C26H48NO3+)…
		10.8547	271.263	235.24219 (C17H31+), 253.25266 (C17H33O+)			C17H35O2+; hydrocarbon ions up to C13, 2 consecutive H2O losses in MS/MS; not in ES-
		10.8635	314.269	see growth medium, ES- table			C18H36NO3+; has Na adduct; 62, 86, and H2O loss from [M+H]+ in MS/MS; has FA adduct in ES-, 358.26022
		10.8721	356.316				C21H42NO3+; ammonium adduct of 339.28934; second peak (at 11.6 min) is not diff.; hydrocarbon ions up to C14, -NH3 in MS/MS ==> 1st peak is ammonium adduct of C21H39O3+; 2nd peak (not diff.) is ethanolamide; not in ES-
		10.9681	364.285		362.27005, 398.24695		C22H38NO3+; has Na adduct; MS/MS may be contaminated with 364.30283; probably ethanolamide (62); has corresponding peak in ES-, 362.27005, and its HCl adduct, 398.24695
		10.9769	321.166	57.07075 (C4H9+), 72.04508 (C3H6NO+), 100.07610 (C5H10NO+), 156.13837 (C9H18NO+)			C14H29N2S2O2+; has 2 S; 57.07075 (C4H9+), 72.04508 (C3H6NO+), 100.07610 (C5H10NO+), 156.13837 (C9H18NO+) in MS/MS; not in ES-
		11.0467	410.363	see comments			C25H48NO3+; 7.5, 11.0, and 12.3 min; at 11.0 the molecular ion may be 428.37366, C25H50NO4+, which is in turn -130 from 558.43650; 7.5 min: 84.08141 (C5H10N+); 11 min (coincides with 428.37366): 62.06082 (C2H8NO+), 86.06058 (C4H8NO+), loss of H2O ==> ethanolamide; 12.2 min: hydrocarbon ions up to C22, H2O loss; not in ES-
		11.0467	428.374	see comments			C25H50NO4+; -130 from 558.43689; at 11.5 this maybe a molecular ion, since it has Na adduct (but not at 11.0 and 11.2 min); 11.0 min (coincides with 410.36295): 62.06082 (C2H8NO+), 86.06058 (C4H8NO+), 2 H2O losses; 11.5 min peak has corresponding peak in ES-, 426.35916, and its HCl adduct, 462.33584
ascr		11.0467	558.437	62.06082 (C2H8NO+), 86.06058 (C4H8NO+), 392.35233 (C25H46NO2+), 410.36292 (C25H48NO3+), 428.37360 (C25H50NO4+)	556.42239, 592.39948, 602.42841		C31H60NO7+; has Na adduct, -130 fragment; 2 peaks, 0.25 min apart; 62.06082 (C2H8NO+), 86.06058 (C4H8NO+), 392.35233 (C25H46NO2+), 410.36292 (C25H48NO3+), 428.37360 (-130, C25H50NO4+) in MS/MS; ethanolamide of bkas; has corresponding peak in ES-, 556.42239, its HCl (592.39948) and FA (602.42841) adducts
EA		11.0728	412.342	62.06082 (C2H8NO+), 86.06058 (C4H8NO+), 291.26816 (C20H35O+), 309.27890 (C20H37O2+), 327.28937 (C20H39O3+), 351.28943 (C22H39O3), 394.33188 (C24H44NO3+)	410.32779, 446.30466		C24H46NO4+; ethanolamide; 62.06082 (C2H8NO+), 86.06058 (C4H8NO+), hydrocarbon ions, 291.26816 (C20H35O+), 309.27890 (C20H37O2+), 327.28937 (C20H39O3+), 351.28943 (C22H39O3), 394.33188 (C24H44NO3+) in MS/MS; has small corresponding peak in ES-, 410.32779, and its HCl adduct, 446.30466
EA		11.0816	386.363	62.06084 (C2H8NO+), 368.35291 (C23H46NO2+)			C23H48NO3+; ethanolamide; 62 and H2O loss; not in ES-
		11.1426	520.421				ammonium adduct; C28H58O7N+; 277.28888 (C20H37+), 295.29944 (C20H39O+), 301.28860 (C22H37+), 319.29956 (C22H39O+), 337.30988 (C22H41O2+), 355.32053 (C22H43O3+); has corresponding peak in ES- (501)
		11.1775	837.561	84.08137 (C5H10N+), 124.99995 (C2H6PO4+), 184.07330 (C5H15NPO4+), 448.41574 (C29H54NO2+), 452.40942 (C28H54NO3+), 466.42560 (C29H56NO3+)			C42H82N2PO12+ (?); MS/MS would be contaminated by 837.36749; 84.08137 (C5H10N+), 123.04185 (C5H8O2Na+ ?), 124.99995 (C2H6PO4+), 184.07330 (C5H15NPO4+), 448.41574 (C29H54NO2+), 452.40942 (C28H54NO3+), 466.42560 (C29H56NO3+) in MS/MS; not in ES-
		11.195	355.321	241.21635 (C15H29O2+), 255.23204 (16H31O2+), 319.29941 (C22H39O+), 337.31000 (C22H41O2+)			C22H43O3+; has ammonium adduct; hydrocarbon ions up to C15, 241.21635 (C15H29O2+), 255.23204 (16H31O2+), H2O loss in MS/MS; not in ES-
		11.2124	267.268				C18H35O+; 11.2 and 11.45 min; likely fragment, has +H2O; hydrocarbon ions up to C12, H2O loss in MS/MS; not in ES-
EA		11.256	456.368	62.06082 (C2H8NO+), 100.07612 (C5H10NO+), 282.27914 (C18H36NO+), 420.34659 (C26H46NON+), 438.35788 (C26H48NO4+)	454.354		C26H50NO5+; 62.06082 (C2H8NO+), 100.07612 (C5H10NO+), 282.27914 (C18H36NO+), 420.34659 (C26H46NON+), 438.35788 (C26H48NO4+) in MS/MS; has corresponding peak in ES-, 454.35391
		11.2909	454.353		452.339		C26H48NO5+; MS/MS maybe contaminated by 454.29330; no MS/MS, but peak is present in MS1; has small corresponding peak in ES-, 452.33871
ascr		11.2952	574.469	62.06082 (C2H8NO+), 390.37314 (C26H48NO+), 408.38394 (C26H50NO2+), 426.39426 (C26H52NO3+), 444.40503 (C26H54NO4+)	608.43105, 618.45966		C32H64NO7+; has Na adduct and -130 fragment; 2 peaks 0.25 min apart; 62.06082 (C2H8NO+), 390.37314 (C26H48NO+), 408.38394 (C26H50NO2+), 426.39426 (C26H52NO3+), 444.40503 (-130, C26H54NO4+) in MS/MS; has small HCl (608.43105) and FA (618.45966) adducts in ES-
		11.2995	297.279				C19H37O2+; 2 peaks, 0.3 min apart; MS/MS would be contaminated by 297.24265; hydrocarbon ions, but other fragments don't make sense; not in ES-
		11.3082	516.426				C29H58NO6+; ammonium adduct; wide shapeless peak; MS/MS may be contaminated by a larger peak 516. 30682; MS/MS fragments don't make sense, probably contamination; not in ES-, but there're 3 peaks with corresponding mass, 497.38565, and its HCl adduct, 533.36233, in ES- at 12.7-13.1 min (has homologs at -14, -28)
		11.3258	572.452	see growth medium, ES- table			C32H62NO7+; 2 peaks, 0.25 min apart; has Na adduct and -130 fragment; 62, 100.07610 (C5H10ON+), 406.36783 (C26H48O2N+), 424.37854 (C26H50O3N+), 442.38919 (-130, C26H52O4N+) in MS/MS; 2nd (bigger) peak additionally has 381.33655 (C24H45O3+); has FA adduct in ES-, 616.44391
EA		11.3607	426.358	all peaks have 62.06082 (C2H8NO+); additionally, 11.3 min peak has: 100.07618 (C5H10NO+), 291.26831 (C20H35O+), 309.27893 (C20H37O2+), 327.28998 (C20H39O3+), 365.30518 (C23H41O3+), 408.34741 (C25H46NO3+); 11.55 and 11.65 min peaks have: 305.28387 (C21H37O+), 323.29449 (C21H39O2+), 341.30521 (C21H41O3+), 365.30518 (C23H41O3+), 408.34741 (C25H46NO3+)	460.32		C25H48NO4+; 3 peaks, 11.3, 11.55, and 11.65 min; all peaks have 62 and hydrocarbon ions in MS/MS; additionally, 11.3 min peak has: 100.07618 (C5H10NO+), 291.26831 (C20H35O+), 309.27893 (C20H37O2+), 327.28998 (C20H39O3+), 365.30518 (C23H41O3+), 408.34741 (C25H46NO3+) in MS/MS; 11.55 and 11.65 min peaks have: 305.28387 (C21H37O+), 323.29449 (C21H39O2+), 341.30521 (C21H41O3+), 365.30518 (C23H41O3+),…
		11.4305	432.368	249.25772 (C18H33+), 267.26819 (C18H35O+); 2nd peak additionally has 285.27869 (C18H37O2+)			C24H50NO5+; ammonium adduct; has corresponding Na adduct; 2 peaks 0.25 min apart; both peaks have hydrocarbon ions up to C9, 249.25772 (C18H33+), 267.26819 (C18H35O+) in MS/MS; 2nd peak additionally has 285.27869 (-130, C18H37O2+); not in ES-
		11.4478	528.426	10.2 min: 85.02900 (C4H5O2+); 11.5 min: 325.27411 (C20H37O3+), 380.35272 (C24H46NO2+), 398.36301 (C24H48NO3+);			C30H58NO6+; 10.2 and 11.5 min; 10.2 min peak: 85.02900 (C4H5O2+); 11.5 min: hydrocarbon ions up to C9, 325.27411 (C20H37O3+), 380.35272 (C24H46NO2+), 398.36301 (-130, C24H48NO3+); not in ES-; 11.5min peak may have a small HCl adduct in ES-, 562.38821
		11.5439	603.495	62.06082 (C2H8NO+), 100.07608 (C5H10NO+), 424.37906 (C26H50NO3+), 442.38904 (C26H52NO4+)			C33H67N2O7+; maybe related to 572.45261, looks like methylamine adduct; coincides with 2nd (bigger) 572.45261 peak; 62, 100.07608 (C5H10NO+), 424.37906 (C26H50NO3+), 442.38904 (C26H52NO4+) in MS/MS; not in ES-
		11.6748	534.437				ammonium adduct; C29H60O7N+; hydrocarbon ions up to C14, 291.30472 (C21H39+), 309.31519 (C21H41O+), 315.30490 (C23H39+), 333.31506 (C23H41O+), 351.32571 (C23H43O2+), 369.33640 (C23H45O3+) in MS/MS; has corresponding peak in ES-, 515.39575
		11.7533	383.352	see comments			C24H47O3+; 11.8, 12.2, 13.4, and 13.6 min; 11.5 and 11.8 min peaks coincide with 692.49512; for 12.2 min it's a -130 - H2O fragment from 531.42590 (ammonium adduct 548 at 12.20 min); hydrocarbon ions up to C24, 347.33084 (C24H43O+), 365.34128 (C24H45O2+) in MS/MS; not in ES-
ascr		11.7533	692.495	see growth medium, ES- table			C36H70NO11+; ammonum adduct; 2 peaks, 0.25 min apart; hydrocarbon ions, glucose fragments, 291.30438 (C21H39+), 319.33578 (C23H43+), 329.32019 (C24H41+), 347.33072 (C24H43O+), 365.34137 (C24H45O2+) in MS/MS; ascr glucoside?; has FA adduct in ES-, 719.45984
		11.762	446.384	263.27316 (C19H35+), 281.28372 (C19H37O+); 2nd peak additionally has 299.29459 (C19H39O2+)			C25H52NO5+; ammonium adduct; 2 peaks 0.25 min apart; hydrocarbon ions up to C9; 263.27316 (C19H35+), 281.28372 (C19H37O+) in MS/MS for both peaks; 2nd peak additionally has 299.29459 (-130, C19H39O2+); not in ES-
		11.7839	384.347	10.8 min: 62.06086 (C2H8NO+), 366.33691 (C23H44NO2+)			C23H46NO3+; 10.8 and 11.8 min; 2nd peak is ammonium adduct of 367.32080; 10.8 min peak - ethanolamide: 62.06086 (C2H8NO+) and H2O loss in MS/MS; 2nd peak: hydrocarbon ions up to C11 and [M+H]+ (367); not in ES-
		11.7882	367.321				C23H43O3+; coincides with 2nd 384.34738 peak; hydrocarbon ions up to C11 in MS/MS; not in ES-
		11.8493	354.3	see comments			C21H40NO3+; 6.0, 9.0, 11.9 min; peak at 12.5 min is not diff.; only peaks at 11.9 and 12.5 min have Na adducts; 6.0 min: 70.06585 (C4H8N+) and 84.08137 (C5H10N+); 9.0 min, ethanolamide: 62.06084 (C2H8NO+), hydrocarbon ions up to C16; 11.9 min, ethanolamide: 62.06082 (C2H8NO+), 86.06065 (C4H8NO+), H2O loss from [M+H]+; 12.5 min, small: hydrocarbon ions up to C9, 294.27924 (C19H36NO+); 11.9 min pea…
ascr		11.9496	588.484	62.06083 (C2H8NO+), 422.39948 (C27H52NO2+), 440.41019 (C27H54NO3+), 458.42047 (C27H56NO4+)	622.446		C33H66NO7+; has Na adduct and -130 fragment; ethanolamide; 62.06083 (C2H8NO+), 422.39948 (C27H52NO2+), 440.41019 (C27H54NO3+), 458.42047 (-130, C27H56NO4+) in MS/MS; has HCl adduct in ES-, 622.44631
		12.0063	529.447	345.35187 (C25H45+), 363.36212 (C25H47O+)			C31H61O6+; has ammonium adduct; hydrocarbon ions up to C12, 345.35187 (C25H45+), 363.36212 (C25H47O+) in MS/MS; ascr#46 has the same formula but elutes at 14.0 min; not in ES-
		12.0674	342.3	62.06085 (C2H8NO+), 86.06064 (C4H8NO+), 324.28979 (C20H38NO2+)			C20H40NO3+; has Na adduct; ethanolamide; 62, 86, and H2O loss from [M+H]+ in MS/MS; not in ES- or overlaps with another, non-diff. peak
		12.1284	473.384				-130 from 473.38388; C27H53O6+ --> C21H43O3+; 473.38388 has ammonium and Na adducts; 2 peaks 0.25 min apart; hydrocarbon ions, 289.28906 (C21H37+), 307.29950 (C21H39O+), 325.30975 (C21H41O2+); ascr#38; has corresponding peak in ES-
ascr		12.1372	586.469	62.06085 (C2H8NO+), 86.06064 (C4H8NO+), 420.38361 (C27H50NO2+), 438.39429 (C27H52NO3+)	584.45407, 620.43073		C33H64NO7+; has Na adduct and -130 fragment; ethanolamide; 62, 86, 420.38361 (C27H50NO2+), 438.39429 (C27H52NO3+) in MS/MS; has corresponding peak in ES-, 584.45407, and its HCl adduct, 620.43073
		12.1808	544.458	361.34659 (C25H45O+), 379.35718 (C25H47O2+)			C31H62NO6+; ammonium adduct; hydrocarbon ions up to C9, 361.34659 (C25H45O+), 379.35718 (C25H47O2+) in MS/MS; not in ES-
		12.1982	548.453				ammonium adduct; C30H62O7N+; hydrocarbon ions up to C16, 305.32016 (C22H41+), 323.33087 (C22H43O+), 329.32037 (C24H41+), 347.33105 (C24H43O+), 365.34143 (C24H45O2+), 383.35187 (C24H47O3+) in MS/MS; has corresponding peak in ES-, 529.41168
		12.2942	460.4	277.28925 (C20H37+), 295.29974 (C20H39O+); 2nd peak additionally has 313.31030 (C20H41O2+)			C26H54NO5+; ammonium adduct; 2 peaks, 0.25 min apart; both peaks have hydrocarbon ions up to C10, 277.28925 (C20H37+), 295.29974 (C20H39O+) in MS/MS; 2nd peak additionally has 313.31030 (-130, C20H41O2+); not in ES-
ascr		12.364	600.484	see growth medium, ES- table			C34H66NO7+; ethanolamide; 62, 100.07616 (C5H10ON+), 434.39944 (C28H52O2N+), 452.41019 (C28H54O3N+), 470.42041 (-130, C28H56O4N+) in MS/MS; has FA adduct in ES-, 644.47552
		12.4033	694.51	85.02903 (C4H5O2+), 95.04966 (C6H7O+), 97.02892 (C5H5O2+), 113.06007 (C6H9O2+), 127.03916 (C6H7O3+), 131.07059 (C6H11O3+), 145.04971 (C6H9O4+), 349.34668 (C24H45O+), 367.35727 (C24H47O2+)	675.47		C36H72NO11+; first two peaks, third peak is not diff.; ammonium adduct; glucose fragments, 349.34668 (C24H45O+), 367.35727 (C24H47O2+) in MS/MS; ascr glucoside?; has corresponding peak in ES-, 675.47
ascr		12.5647	556.458	347.33090 (C24H43O+), 408.38376 (C26H50NO2+), 426.39459 (C26H52NO3+)	590.42		C32H62NO6+; has Na adduct; 2 peaks 0.3 min apart; hydrocarbon ions up to C12, 347.33090 (C24H43O+), 408.38376 (C26H50NO2+), 426.39459 (C26H52NO3+) in MS/MS; has HCl adduct in ES-, 590.41982
		12.569	393.373	319.33627 (C23H43+), 347.36789 (C25H47+), 357.35144 (C26H45+), 375.36246 (C26H47O+)			C26H49O2+; 12.6 and 14.5 min; hydrocarbon ions up to C11, 319.33627 (C23H43+), 347.36789 (C25H47+), 357.35144 (C26H45+), 375.36246 (C26H47O+) in MS/MS for both peaks; not in ES-
EA		12.617	454.389	62.06085 (C2H8NO+), 282.27823 (C18H36NO+), 313.27383 (C19H37O3+), 369.33578 (C23H45O3+), 393.33575 (C25H45O3+), 436.37976 (C27H50NO3+)	488.352		C27H52NO4+; has Na adduct; 62, 282.27823 (C18H36NO+), 313.27383 (C19H37O3+), 369.33578 (C23H45O3+), 393.33575 (C25H45O3+), 436.37976 (C27H50NO3+) in MS/MS; has small HCl adduct in ES-, 488.35168
		12.6257	509.382				Na adduct; C28H54O6Na+; no fragments in MS/MS; Na adduct of ascr#40, has corresponding peak in ES-, 485.38541
		12.713	562.468				ammonium adduct; C31H64O7N+; 307.26358 (C20H35O2+), 319.33652 (C23H43+), 337.34650 (C23H45O+), 343.33594 (C25H43+), 361.34650 (C25H45O+), 379.35696 (C25H47O2+), 397.36740 (C25H49O3+); has corresponding peak in ES- (543); bhas
		12.7916	474.416	291.30457 (C21H39+), 309.31509 (C21H41O+); 2nd peak additionally has 327.32602 (C21H43O2+)	491.352		C27H56NO5+; ammonium adduct; 2 peaks 0.25 min apart, 2nd peak is small; hydrocarbon ions up to C12, 291.30457 (C21H39+), 309.31509 (C21H41O+); 2nd peak additionally has 327.32602 (-130, C21H43O2+); has small HCl adduct in ES-, 491.3521
		12.8003	468.405	62.06083 (C2H8NO+), 100.07610 (C5H10NO+), 212.23735 (C14H30N+), 407.35123 (C26H47O3+), 450.39441 (C28H52NO3+)	502.367		C28H54NO4+; MS/MS may be contaminated by 468.47815; 62.06083 (C2H8NO+), 100.07610 (C5H10NO+), 212.23735 (C14H30N+), 407.35123 (C26H47O3+), 450.39441 (C28H52NO3+); has small HCl adduct in ES-, 502.36727
		13.1107	518.442				ammonum adduct, C29H60O6N+; hydrocarbon ions up to C11, 335.33054 (C23H43O+), 353.34137 (C23H45O2+); has corresponding peak in ES- (499); ascr#42
		13.1325	638.498				C37H68NO7+; poor fragmentation in MS/MS; not in ES-
ascr		13.1677	614.5	62.06083 (C2H8NO+), 448.41498 (C29H54NO2+), 466.42572 (C29H56NO3+)	648.462		C35H68NO7+; MS/MS may be contaminated; 62.06083 (C2H8NO+), 448.41498 (C29H54NO2+), 466.42572 (C29H56NO3+) in MS/MS; has HCl adduct in ES-, 648.46218
		13.2456	488.431	305.32031 (C22H41+), 323.33087 (C22H43O+); 2nd (small) peak additionally has 341.34128 (C22H45O2+)	505.367		C28H58NO5+; ammonium adduct; hydrocarbon ions up to C14, 305.32031 (C22H41+), 323.33087 (C22H43O+) in MS/MS; 2nd (small) peak additionally has 341.34128 (C22H45O2+); has HCl adduct in ES-, 505.36742
		13.3501	604.479	319.33673 (C23H43+), 343.33636 (C25H43+), 361.34680 (C25H45O+), 379.35757 (C25H47O2+), 439.37784 (C27H51O4+)			C33H66NO8+; ammonium adduct; hydrocarbon ions, 319.33673 (C23H43+), 343.33636 (C25H43+), 361.34680 (C25H45O+), 379.35757 (C25H47O2+), 439.37784 (C27H51O4+) in MS/MS; has small corresponding peak in ES-
		13.3718	513.416	291.30432 (C21H39+), 319.33646 (C23H43+), 329.32016 (C24H41+), 347.33087 (C24H43O+), 365.34152 (C24H45O2+)	511.401		Na adduct of 513.41565 (C30H57O6+); 2 peaks 0.25 min apart; 291.30432 (C21H39+), 319.33646 (C23H43+), 329.32016 (C24H41+), 347.33087 (C24H43O+), 365.34152 (C24H45O2+) in MS/MS for both peaks; in addition, 535.39880 has other diff. peaks at 13.1 and 14.4 min, C32H55O6+; has corresponding peak in ES-, 511.40115; probably ascr#43
ascr		13.4109	584.489	375.36240 (C26H47O-), 436.41498 (C28H54NO2+), 454.42575 (C28H56NO3+)	618.451		C34H66NO6+; hydrocarbon ions, 375.36240 (C26H47O-), 436.41498 (C28H54NO2+), 454.42575 (-130, C28H56NO3+) in MS/MS; has HCl adduct in ES-, 618.45101
		13.4802	367.357	331.33612 (C23H43+), 349.34692 (C24H45O+)			C24H47O2+; hydrocarbon ions and loss of 2 H2O in MS/MS; not in ES-
		13.6988	595.455				Na adduct, C33H64O7Na+; no good fragments in MS/MS; has corresponding peak in ES-,
		13.7101	502.447	319.33594 (C23H43+), 337.34634 (C23H45O+); 2nd (smaller) peak additionally has 355.35687 (C23H47O2+)			C29H60NO5+; ammonium adduct; 2 peaks, 0.3 min apart; hydrocarbon ions, 319.33594 (C23H43+), 337.34634 (C23H45O+) in MS/MS for both peaks; 2nd (smaller) peak additionally has 355.35687 (-130, C23H47O2+); has small HCl adduct in ES-
		13.7993	451.376				C26H52O4Na+; MS/MS would be contaminated by 451.24573; no fragmentation in MS/MS; not in ES-
ascr		14.0759	573.41	443.34793 (C24H47N2O5+), 499.37332 (C27H51N2O6+)			C30H57N2O8+; 443.34793 (-130, C24H47N2O5+), 499.37332 (C27H51N2O6+) in MS/MS, but overall pure fragmentation; not in ES-
		14.179	516.462	333.35147 (C24H45+), 351.36206 (C24H47O+)	533.399		C30H62NO5+; ammonium adduct; hydrocarbon ions, 333.35147 (C24H45+), 351.36206 (C24H47O+) in MS/MS; has small HCl adduct in ES-, 533.39858
		14.4049	563.428				C32H60O6Na+; has Na2 adduct; poor fragmentation; 433.36597 (-130, C26H50O3Na+) in MS/MS; has corresponding peak in ES-, 539.43201; ascr#47
		14.4137	411.383	319.33615 (C23H43+), 347.36719 (C25H47+), 357.35162 (C26H45+), 375.36224 (C26H47O+)			C26H51O3+; hydrocarbon ions up to C13, 319.33615 (C23H43+), 347.36719 (C25H47+), 357.35162 (C26H45+), 375.36224 (C26H47O+) in MS/MS; not in ES-
		14.7384	530.478	347.36725 (C25H47+), 365.37784 (C25H49O+)	547.415		C31H64NO5+; ammonium adduct; hydrocarbon ions, 347.36725 (C25H47+), 365.37784 (C25H49O+) in MS/MS; has small HCl adduct in ES-, 547.41457
			171 features, 43 are also in ES- table, 8 are also diff. in L1 medium, of which all 8 are in L1 medium table
